# Supplementary material
Source: PubMed Central journal article supplement (PMC4698150)

**eTable 1. Pearson Correlation Coefficients<sup>#</sup> Between Air Toxics Measured at 4 Monitoring Stations in Los Angeles County, 1995-2006.**

|                       | Benzene | Perchloroethylene | 1,3-Butadiene | Toluene | Ortho-Xylene | Meta/para-Xylene | Ethyl Benzene | Methylene Chloride | PAHs  | Lead  | Vanadium | Chromium | Manganese | Nickel | Selenium | Acetaldehyde | Formaldehyde | Ortho-dichlorobenzene | Para-dichlorobenzene | Chloroform | Trichloroethylene | Copper | Hexavalent Chromium | Molybdenum |  |
|-----------------------|---------|-------------------|---------------|---------|--------------|------------------|---------------|--------------------|-------|-------|----------|----------|-----------|--------|----------|--------------|--------------|-----------------------|----------------------|------------|-------------------|--------|---------------------|------------|--|
| Benzene               | 1.00    |                   |               |         |              |                  |               |                    |       |       |          |          |           |        |          |              |              |                       |                      |            |                   |        |                     |            |  |
| Perchloroethylene     | 0.94    | 1.00              |               |         |              |                  |               |                    |       |       |          |          |           |        |          |              |              |                       |                      |            |                   |        |                     |            |  |
| 1,3-Butadiene         | 0.97    | 0.93              | 1.00          |         |              |                  |               |                    |       |       |          |          |           |        |          |              |              |                       |                      |            |                   |        |                     |            |  |
| Toluene               | 0.90    | 0.91              | 0.85          | 1.00    |              |                  |               |                    |       |       |          |          |           |        |          |              |              |                       |                      |            |                   |        |                     |            |  |
| Ortho-Xylene          | 0.93    | 0.91              | 0.90          | 0.91    | 1.00         |                  |               |                    |       |       |          |          |           |        |          |              |              |                       |                      |            |                   |        |                     |            |  |
| Meta/para-Xylene      | 0.84    | 0.84              | 0.82          | 0.88    | 0.94         | 1.00             |               |                    |       |       |          |          |           |        |          |              |              |                       |                      |            |                   |        |                     |            |  |
| Ethyl Benzene         | 0.90    | 0.88              | 0.88          | 0.84    | 0.94         | 0.83             | 1.00          |                    |       |       |          |          |           |        |          |              |              |                       |                      |            |                   |        |                     |            |  |
| Methylene Chloride    | 0.78    | 0.80              | 0.72          | 0.79    | 0.77         | 0.69             | 0.79          | 1.00               |       |       |          |          |           |        |          |              |              |                       |                      |            |                   |        |                     |            |  |
| PAHs                  | 0.85    | 0.81              | 0.89          | 0.72    | 0.73         | 0.65             | 0.71          | 0.70               | 1.00  |       |          |          |           |        |          |              |              |                       |                      |            |                   |        |                     |            |  |
| Lead                  | 0.69    | 0.76              | 0.67          | 0.76    | 0.73         | 0.57             | 0.70          | 0.65               | 0.40  | 1.00  |          |          |           |        |          |              |              |                       |                      |            |                   |        |                     |            |  |
| Vanadium              | -0.49   | -0.51             | -0.50         | -0.53   | -0.48        | -0.31            | -0.50         | -0.55              | -0.44 | -0.48 | 1.00     |          |           |        |          |              |              |                       |                      |            |                   |        |                     |            |  |
| Chromium              | -0.03   | 0.02              | -0.12         | 0.15    | -0.00        | -0.01            | 0.03          | 0.31               | 0.37  | 0.08  | 0.22     | 1.00     |           |        |          |              |              |                       |                      |            |                   |        |                     |            |  |
| Manganese             | -0.11   | -0.04             | -0.21         | 0.10    | -0.06        | -0.03            | -0.06         | 0.24               | 0.06  | 0.07  | 0.31     | 0.94     | 1.00      |        |          |              |              |                       |                      |            |                   |        |                     |            |  |
| Nickel                | -0.27   | -0.23             | -0.34         | -0.17   | -0.29        | -0.26            | -0.26         | -0.04              | -0.07 | -0.16 | 0.51     | 0.86     | 0.83      | 1.00   |          |              |              |                       |                      |            |                   |        |                     |            |  |
| Selenium              | 0.24    | 0.38              | 0.20          | 0.37    | 0.25         | 0.17             | 0.25          | 0.44               | 0.34  | 0.49  | -0.08    | 0.66     | 0.61      | 0.58   | 1.00     |              |              |                       |                      |            |                   |        |                     |            |  |
| Acetaldehyde          | 0.19    | 0.31              | 0.23          | 0.26    | 0.27         | 0.25             | 0.19          | 0.15               | 0.27  | 0.32  | -0.12    | 0.09     | 0.05      | 0.00   | 0.39     | 1.00         |              |                       |                      |            |                   |        |                     |            |  |
| Formaldehyde          | 0.22    | 0.28              | 0.25          | 0.24    | 0.31         | 0.30             | 0.26          | 0.15               | 0.26  | 0.43  | -0.10    | 0.13     | 0.11      | -0.00  | 0.41     | 0.63         | 1.00         |                       |                      |            |                   |        |                     |            |  |
| Ortho-dichlorobenzene | 0.01    | -0.05             | -0.04         | -0.01   | 0.13         | 0.07             | 0.09          | 0.06               | 0.00  | 0.29  | -0.06    | 0.02     | 0.02      | -0.19  | -0.09    | -0.03        | 0.18         | 1.00                  |                      |            |                   |        |                     |            |  |
| Para-dichlorobenzene  | 0.01    | -0.04             | -0.02         | -0.01   | 0.11         | 0.18             | 0.10          | -0.01              | -0.06 | 0.04  | -0.18    | -0.19    | -0.16     | -0.24  | -0.12    | -0.32        | -0.09        | 0.33                  | 1.00                 |            |                   |        |                     |            |  |
| Chloroform            | 0.39    | 0.44              | 0.33          | 0.43    | 0.51         | 0.52             | 0.45          | 0.37               | 0.40  | 0.24  | -0.26    | -0.03    | -0.05     | -0.23  | 0.05     | 0.33         | 0.36         | 0.29                  | 0.20                 | 1.00       |                   |        |                     |            |  |
| Trichloroethylene     | 0.34    | 0.32              | 0.38          | 0.43    | 0.37         | 0.43             | 0.38          | 0.32               | 0.23  | 0.38  | -0.52    | -0.15    | -0.10     | -0.39  | 0.03     | -0.12        | -0.13        | -0.05                 | 0.28                 | -0.06      | 1.00              |        |                     |            |  |
| Copper                | 0.52    | 0.62              | 0.50          | 0.49    | 0.50         | 0.54             | 0.47          | 0.56               | 0.36  | 0.48  | -0.28    | -0.00    | 0.01      | -0.13  | 0.27     | -0.02        | 0.20         | 0.37                  | 0.32                 | 0.33       | 0.25              | 1.00   |                     |            |  |
| Hexavalent Chromium   | 0.52    | 0.34              | 0.42          | 0.43    | 0.47         | 0.40             | 0.38          | 0.54               | 0.21  | 0.18  | -0.22    | 0.15     | 0.00      | -0.14  | -0.03    | -0.05        | 0.10         | 0.33                  | -0.09                | 0.26       | -0.11             | 0.12   | 1.00                |            |  |
| Molybdenum            | 0.54    | 0.49              | 0.47          | 0.47    | 0.49         | 0.33             | 0.41          | 0.43               | 0.41  | 0.38  | 0.02     | 0.38     | 0.28      | 0.36   | 0.50     | 0.37         | 0.46         | 0.12                  | -0.25                | 0.19       | -0.23             | 0.10   | 0.25                | 1.00       |  |

<sup>#</sup> pregnancy averages based on non-cases.

**eTable 2:** Air Toxics Measures Entire Pregnancy Averages Among Non-cases 5 km Distance to Governmental Air Monitoring Stations, Los Angeles County.

| Air Toxic                     | Factor load <sup>#</sup> | Mean (SD)     | IQR   |
|-------------------------------|--------------------------|---------------|-------|
| <b>Factor 1</b>               |                          |               |       |
| Benzene (ppbV)                | 0.96                     | 1.16 (0.58)   | 0.78  |
| Perchloroethylene (ppbV)      | 0.96                     | 0.23 (0.17)   | 0.24  |
| 1,3-Butadiene (ppbV)          | 0.95                     | 0.31 (0.17)   | 0.28  |
| Toluene (ppbV)                | 0.94                     | 3.04 (1.33)   | 1.68  |
| Ortho-Xylene (ppbV)           | 0.93                     | 0.49 (0.22)   | 0.28  |
| Meta/para-Xylene (ppbV)       | 0.86                     | 1.41 (0.62)   | 0.88  |
| Ethyl Benzene (ppbV)          | 0.91                     | 0.38 (0.16)   | 0.19  |
| Methylene Chloride (ppbV)     | 0.85                     | 0.77 (0.40)   | 0.54  |
| PAHs (ppbv)                   | 0.81                     | 1.14 (0.49)   | 0.79  |
| Lead (ng/m3)                  | 0.73                     | 23.96 (11.54) | 13.64 |
| Vanadium (ng/m3)              | -0.61                    | 12.12 (5.19)  | 6.58  |
| <b>Factor 2</b>               |                          |               |       |
| Chromium (ng/m3)              | 0.97                     | 7.09 (3.80)   | 1.74  |
| Manganese (ng/m3)             | 0.94                     | 26.99 (12.52) | 5.62  |
| Nickel (ng/m3)                | 0.91                     | 6.39 (2.25)   | 1.82  |
| Selenium (ng/m3)              | 0.73                     | 1.60 (0.65)   | 0.59  |
| <b>Factor 3</b>               |                          |               |       |
| Acetaldehyde (ppbV)           | 0.78                     | 1.39 (0.42)   | 0.50  |
| Formaldehyde (ppbV)           | 0.76                     | 4.00 (1.30)   | 1.93  |
| <b>Factor 4</b>               |                          |               |       |
| Ortho-Dichloro-benzene (ppbV) | 0.86                     | 0.14 (0.03)   | 0.02  |
| Para-Dichloro-benzene (ppbV)  | 0.64                     | 0.16 (0.03)   | 0.02  |
| <b>Not loading</b>            |                          |               |       |
| Chloroform (ppbV)             | -                        | 0.05 (0.01)   | 0.01  |
| Trichloroethylene (ppbV)      | -                        | 0.11 (0.14)   | 0.14  |
| Copper (ng/m3)                | -                        | 59.12 (51.69) | 22.81 |
| Hexavalent Chromium (ng/m3)   | -                        | 0.19 (0.16)   | 0.10  |
| Molybdenum (ng/m3)            | -                        | 2.51 (0.53)   | 0.82  |

<sup>#</sup>Factor loadings for given factors absolute values: >0.60; Varimax Rotation Factor Pattern (SAS 9.3).

**eTable 3.** Trimester-Specific Means for Pregnancy Exposure to Air Toxics in 5 km Buffer Birth Years 1995-2006.

| Air Toxic            | Trimester 1 |       |       | Trimester 2 |       |       | Trimester 3 |       |       |
|----------------------|-------------|-------|-------|-------------|-------|-------|-------------|-------|-------|
|                      | N           | Mean  | SD    | N           | Mean  | SD    | N           | Mean  | SD    |
| <b>Factor 1</b>      |             |       |       |             |       |       |             |       |       |
| Benzene              | 128,221     | 1.27  | 0.78  | 128,221     | 1.17  | 0.75  | 127,731     | 1.06  | 0.65  |
| Perchloroethylene    | 118,910     | 0.25  | 0.20  | 118,910     | 0.23  | 0.19  | 118,449     | 0.21  | 0.18  |
| 1,3-Butadiene        | 128,221     | 0.34  | 0.23  | 128,221     | 0.32  | 0.23  | 127,731     | 0.28  | 0.20  |
| Toluene              | 122,584     | 3.26  | 1.85  | 122,584     | 3.04  | 1.79  | 122,102     | 2.85  | 1.67  |
| Ortho-Xylene         | 121,744     | 0.54  | 0.32  | 121,744     | 0.49  | 0.30  | 121,265     | 0.44  | 0.26  |
| Meta/para-Xylene     | 122,485     | 1.53  | 0.93  | 122,485     | 1.39  | 0.89  | 121,998     | 1.32  | 0.85  |
| Ethyl Benzene        | 121,902     | 0.41  | 0.24  | 121,902     | 0.38  | 0.22  | 121,425     | 0.36  | 0.21  |
| Methylene Chloride   | 123,704     | 0.82  | 0.49  | 123,704     | 0.77  | 0.47  | 123,218     | 0.74  | 0.46  |
| PAHs                 | 109,899     | 1.31  | 0.99  | 109,899     | 1.14  | 0.96  | 109,489     | 0.97  | 0.79  |
| Lead                 | 79,290      | 25.22 | 17.43 | 79,290      | 24.41 | 17.48 | 78,986      | 22.70 | 15.04 |
| Vanadium             | 79,290      | 11.99 | 6.10  | 79,290      | 12.01 | 5.97  | 78,986      | 12.41 | 6.16  |
| <b>Factor 2</b>      |             |       |       |             |       |       |             |       |       |
| Chromium             | 79,290      | 7.17  | 4.15  | 79,290      | 7.16  | 4.47  | 78,986      | 7.03  | 4.51  |
| Manganese            | 79,290      | 27.24 | 13.49 | 79,290      | 27.14 | 14.84 | 78,986      | 26.82 | 14.87 |
| Nickel               | 79,290      | 6.33  | 2.65  | 79,290      | 6.37  | 2.79  | 78,986      | 6.46  | 2.77  |
| Selenium             | 79,290      | 1.63  | 0.85  | 79,290      | 1.58  | 0.79  | 78,986      | 1.57  | 0.84  |
| <b>Factor 3</b>      |             |       |       |             |       |       |             |       |       |
| Acetaldehyde         | 123,429     | 1.41  | 0.59  | 123,429     | 1.38  | 0.57  | 122,959     | 1.39  | 0.60  |
| Formaldehyde         | 123,429     | 3.94  | 1.57  | 123,429     | 3.97  | 1.65  | 122,959     | 4.08  | 1.75  |
| <b>Factor 4</b>      |             |       |       |             |       |       |             |       |       |
| Ortho-dichlorobenz.  | 105,254     | 0.14  | 0.05  | 105,254     | 0.14  | 0.05  | 104,836     | 0.14  | 0.04  |
| Para-dichlorobenzene | 104,914     | 0.16  | 0.05  | 104,914     | 0.15  | 0.05  | 104,496     | 0.16  | 0.05  |
| <b>Not loading</b>   |             |       |       |             |       |       |             |       |       |
| Chloroform           | 123,824     | 0.05  | 0.02  | 123,824     | 0.05  | 0.02  | 123,340     | 0.05  | 0.02  |
| Trichloroethylene    | 120,431     | 0.13  | 0.19  | 120,431     | 0.11  | 0.16  | 119,962     | 0.10  | 0.14  |
| Copper               | 79,290      | 59.13 | 74.33 | 79,290      | 58.25 | 70.51 | 78,986      | 61.20 | 82.51 |
| Hexavalent-chromium  | 73,843      | 0.20  | 0.30  | 73,843      | 0.20  | 0.31  | 73,548      | 0.19  | 0.30  |
| Molybdenum           | 79,290      | 2.58  | 0.80  | 79,290      | 2.53  | 0.79  | 78,986      | 2.43  | 0.69  |

**eTable 4.** Characteristics of the Population for the 10 Mile Cohort, Los Angeles County, Birth Years 1995-2006.

|                                            | Controls        |
|--------------------------------------------|-----------------|
|                                            | (N = 1,076,628) |
|                                            | n (%)           |
| <b>Mother's race/ethnicity</b>             |                 |
| Non-Hispanic White                         | 139,998 (13)    |
| Hispanic White                             | 731,269 (68)    |
| African American/Black                     | 89,219 (8)      |
| Asian                                      | 109,379 (10)    |
| Other/not specified                        | 4,937 (0.5)     |
| Missing                                    | 1,826 (0.2)     |
| <b>Mother's age</b>                        |                 |
| ≤ 18                                       | 78,741 (7)      |
| 19-25                                      | 369,838 (34)    |
| 26-30                                      | 289,303 (27)    |
| 31-35                                      | 219,978 (20)    |
| > 35                                       | 118,768 (11)    |
| <b>Source of payment for prenatal care</b> |                 |
| Public (Medi-Cal)                          | 621,155 (58)    |
| Private                                    | 420,664 (39)    |
| Other                                      | 28,945 (3)      |
| Missing                                    | 5,864 (0.5)     |
| <b>Parity</b>                              |                 |
| Prima para                                 | 407,698 (38)    |
| Second                                     | 333,571 (31)    |
| Third                                      | 193,646 (18)    |
| More                                       | 141,345 (13)    |
| Missing                                    | 368 (0)         |
| <b>Maternal education</b>                  |                 |
| Less than high school                      | 447,912 (42)    |
| High school                                | 288,158 (27)    |
| More than high school                      | 329,354 (31)    |
| Missing                                    | 11,204 (1)      |
| <b>US born</b>                             |                 |
| Yes                                        | 415,418 (39)    |
| No                                         | 659,548 (61)    |
| Missing                                    | 1,662 (0.2)     |
| <b>Child sex</b>                           |                 |
| Male                                       | 544,939 (51)    |
| Female                                     | 531,687 (49)    |
| Missing                                    | 2 (0)           |

Differences to 100% due to rounding.

**eTable 5.** Distribution of Cases and Non-cases by Air Toxics Monitor Los Angeles County, Birth Years 1995-2006.

|             | <b>Cases</b> | <b>Non-cases</b> |
|-------------|--------------|------------------|
|             | N (%)        | N (%)            |
| Long Beach  | 140 (18)     | 43,016 (29)      |
| Azusa       | 57 (7)       | 10,566 (7)       |
| Burbank     | 157 (20)     | 21,322 (14)      |
| LA Downtown | 414 (54)     | 73,040 (49)      |
| Missing     | -            | 10 (0)           |

Differences to 100% due to rounding.

**eTable 6:** Adjusted<sup>#</sup> Odds Ratios for Pregnancy Exposure to Air Toxics<sup>1</sup> in 5km Distance for Autistic Disorder in Two- and Three Pollutant Models, Birth Years 1995-2006, Los Angeles County.

| Air Toxic 1          | IQR  | Air Toxic 2          | IQR  | Air Toxic 3       | IQR   | N (case/<br>total<br>population) | Air toxic 1<br>OR (95% CI) | Air toxic 2<br>OR (95% CI) | Air toxic 3<br>OR (95% CI) |
|----------------------|------|----------------------|------|-------------------|-------|----------------------------------|----------------------------|----------------------------|----------------------------|
| 1,3-Butadiene        | 0.28 | Formaldehyde         | 1.93 |                   |       | 560/107,245                      | 1.25<br>(0.88, 1.78)       | 1.32<br>(1.13, 1.54)       |                            |
| Meta/para-<br>Xylene | 0.88 | Formaldehyde         | 1.93 |                   |       | 554/102,559                      | 1.36<br>(1.09, 1.68)       | 1.27<br>(1.08, 1.48)       |                            |
| 1,3-Butadiene        | 0.28 | Formaldehyde         | 1.93 | Trichloroethylene | 0.14  | 544/102,255                      | 1.15<br>(0.79, 1.68)       | 1.39<br>(1.18, 1.62)       | 1.14<br>(1.01, 1.28)       |
| Meta/para-<br>Xylene | 0.88 | Formaldehyde         | 1.93 | Trichloroethylene | 0.14  | 538/97,577                       | 1.24<br>(0.99, 1.56)       | 1.34<br>(1.14, 1.58)       | 1.12<br>(0.99, 1.27)       |
| 1,3-Butadiene        | 0.28 | Meta/para-<br>Xylene | 0.88 |                   |       | 641/120,714                      | 0.60 (0.31,<br>1.15)       | 1.99<br>(1.34, 2.95)       |                            |
| 1,3-Butadiene        | 0.28 | Meta/para-<br>Xylene | 0.88 | Lead              | 13.64 | 262/61,498                       | 0.67<br>(0.29, 1.55)       | 1.32<br>(0.77, 2.25)       | 1.43<br>(1.1, 1.88)        |

<sup>#</sup>Adjusted for: birth year, maternal race/ethnicity, maternal age and education, child sex, type of insurance, place of birth mother (US vs. non US), parity (prima para, 2, 3 or more births).

**eTable 7.** Pregnancy Exposure to Air Toxics<sup>1</sup> in 5km Distance Adjusted<sup>#</sup> Odds Ratios (per IQR increase) for Autistic Disorder by Sex, Birth Years 1995-2006, Los Angeles County.

| Air Toxic                 | case/<br>total<br>population<br>n | Boys          |            | case/<br>total<br>population<br>n | Girls         |            |
|---------------------------|-----------------------------------|---------------|------------|-----------------------------------|---------------|------------|
|                           |                                   | Odds<br>Ratio | 95% CI     |                                   | Odds<br>Ratio | 95% CI     |
| <b>Factor 1</b>           |                                   |               |            |                                   |               |            |
| Benzene                   | 523/64,628                        | 1.41          | 1.06, 1.89 | 128/61,774                        | 1.62          | 0.90, 2.89 |
| Perchloroethylene         | 497/59,978                        | 1.43          | 1.08, 1.90 | 122/57,312                        | 1.29          | 0.73, 2.29 |
| 1,3-Butadiene             | 523/64,628                        | 1.54          | 1.11, 2.15 | 128/61,774                        | 1.79          | 0.89, 3.58 |
| Toluene                   | 507/61,808                        | 1.39          | 1.12, 1.74 | 124/59,062                        | 1.26          | 0.80, 1.99 |
| Ortho-Xylene              | 494/61,415                        | 1.44          | 1.18, 1.77 | 125/58,644                        | 1.35          | 0.91, 2.00 |
| Meta/para-Xylene          | 513/61,711                        | 1.53          | 1.24, 1.88 | 128/59,003                        | 1.45          | 0.96, 2.19 |
| Ethyl Benzene             | 491/61,524                        | 1.50          | 1.23, 1.81 | 124/58,630                        | 1.43          | 0.99, 2.05 |
| Methylene<br>Chloride~    | 514/62,335                        | 1.10          | 0.93, 1.31 | 127/59,637                        | 1.01          | 0.71, 1.42 |
| PAHs                      | 453/55,324                        | 0.94          | 0.75, 1.17 | 104/53,181                        | 1.62          | 0.97, 2.68 |
| Lead                      | 291/39,943                        | 1.63          | 1.31, 2.01 | 57/38,430                         | 0.98          | 0.60, 1.61 |
| Vanadium                  | 291/39,943                        | 0.61          | 0.47, 0.78 | 57/38,430                         | 1.04          | 0.64, 1.68 |
| <b>Factor 2</b>           |                                   |               |            |                                   |               |            |
| Chromium                  | 291/39,943                        | 1.01          | 0.97, 1.06 | 57/38,430                         | 1.01          | 0.90, 1.12 |
| Manganese                 | 291/39,943                        | 1.02          | 0.98, 1.07 | 57/38,430                         | 1.03          | 0.93, 1.14 |
| Nickel                    | 291/39,943                        | 0.95          | 0.87, 1.05 | 57/38,430                         | 1.05          | 0.87, 1.27 |
| Selenium                  | 291/39,943                        | 1.04          | 0.93, 1.16 | 57/38,430                         | 1.11          | 0.88, 1.39 |
| <b>Factor 3</b>           |                                   |               |            |                                   |               |            |
| Acetaldehyde              | 516/62,277                        | 1.22          | 1.08, 1.38 | 125/59,516                        | 1.11          | 0.86, 1.43 |
| Formaldehyde              | 516/62,277                        | 1.38          | 1.19, 1.60 | 125/59,516                        | 1.17          | 0.87, 1.56 |
| <b>Factor 4</b>           |                                   |               |            |                                   |               |            |
| Ortho-<br>dichlorobenzene | 448/53,105                        | 1.07          | 0.97, 1.18 | 110/50,764                        | 0.95          | 0.78, 1.15 |
| Para-<br>dichlorobenzene  | 444/52,936                        | 0.97          | 0.91, 1.03 | 108/50,597                        | 0.92          | 0.81, 1.05 |
| <b>Not loading</b>        |                                   |               |            |                                   |               |            |
| Chloroform                | 510/62,456                        | 1.05          | 0.93, 1.18 | 126/59,665                        | 1.10          | 0.87, 1.39 |
| Trichloroethylene         | 501/60,701                        | 1.16          | 1.03, 1.31 | 123/58,080                        | 1.07          | 0.84, 1.36 |
| Copper                    | 291/39,943                        | 1.07          | 1.00, 1.16 | 57/38,430                         | 1.14          | 0.99, 1.31 |
| Hexavalent<br>Chromium    | 232/37,173                        | 0.99          | 0.88, 1.11 | 50/35,789                         | 0.70          | 0.33, 1.49 |
| Molybdenum <sup>#</sup>   | 291/39,943                        | 0.88          | 0.65, 1.18 | 57/38,430                         | 1.10          | 0.55, 2.17 |

<sup>#</sup>Adjusted for: birth year, maternal race/ethnicity, maternal age and education, type of insurance, place of birth mother (US vs. non US), parity (prima para, 2, 3 or more births).

**eFigure 1.** Map of the Los Angeles Basin with California Air Toxics Monitoring Stations (Long Beach, Azusa, Burbank, Los Angeles Downtown) indicated.



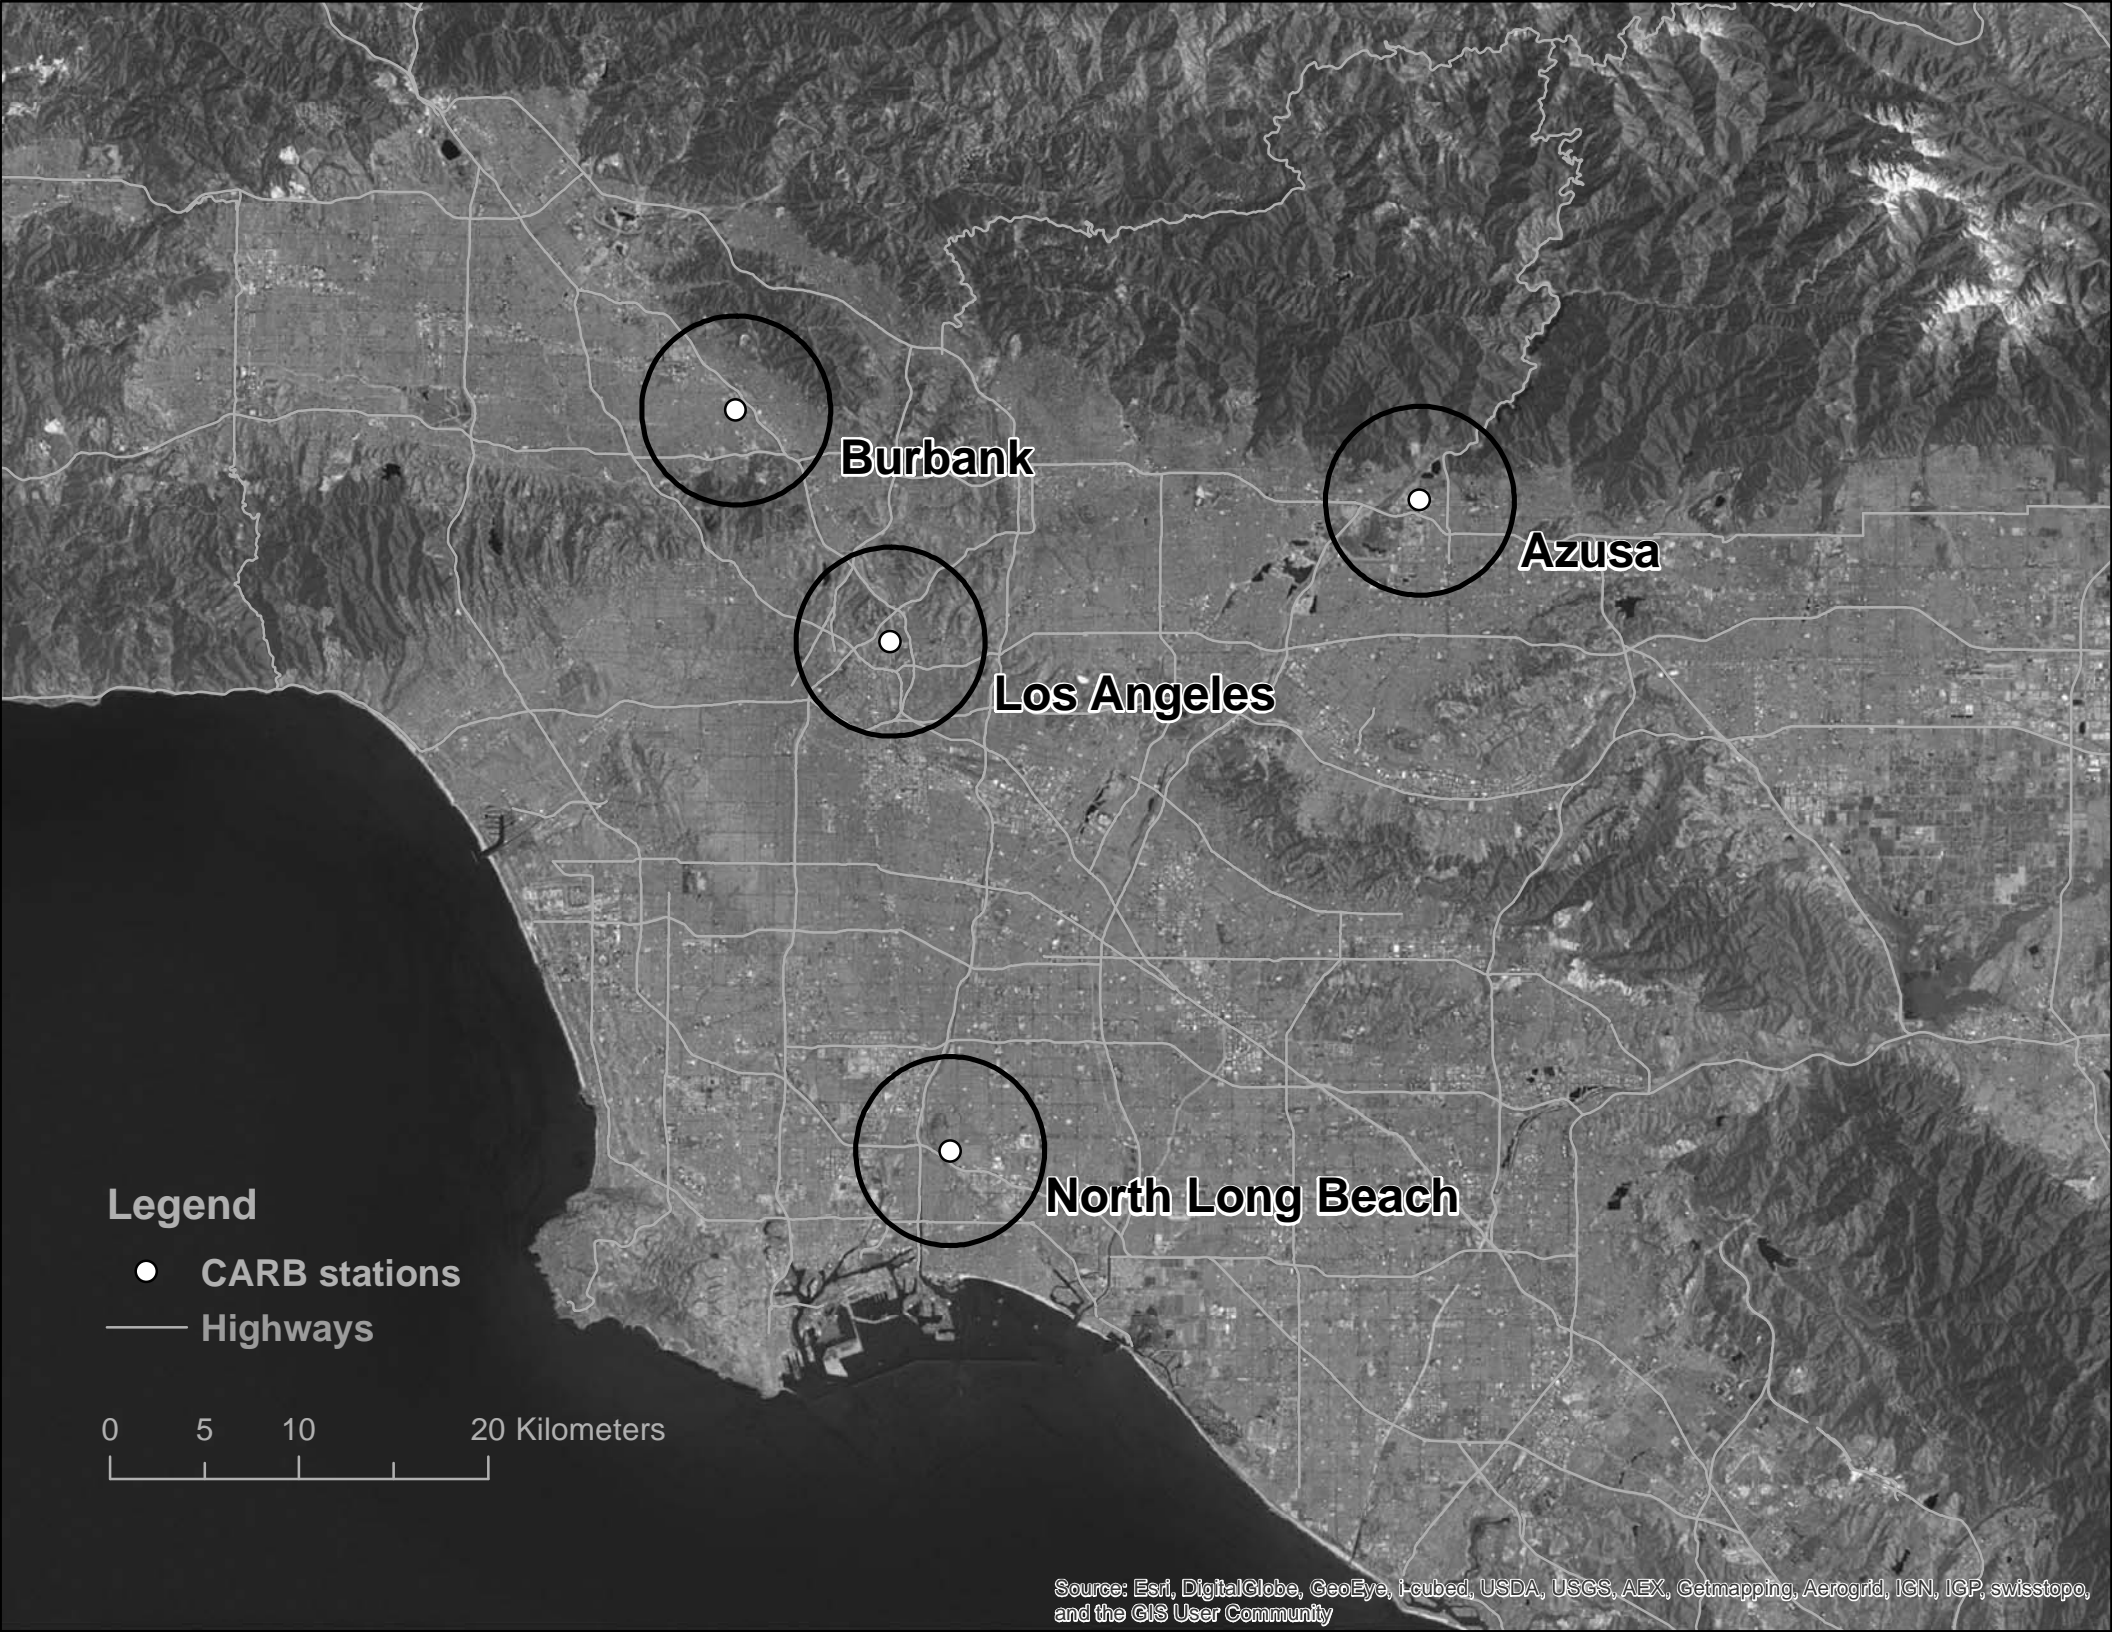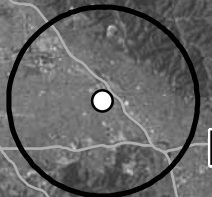

**Burbank**

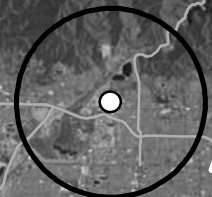

**Azusa**

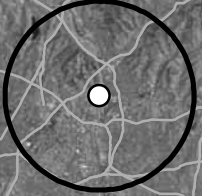

**Los Angeles**

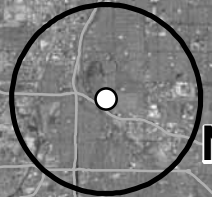

**North Long Beach**

**Legend**

- **CARB stations**
- **Highways**

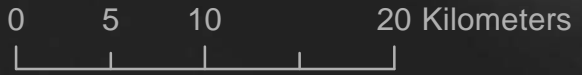

**eFigure 2.** Plots of 12-day measurement 24 hours averages 1995 – 2006 by monitoring site and air toxic.  
Legend for monitoring stations: 2429= Long Beach; 2484= Azusa; 2492= Burbank; 2899= Los Angeles downtown.

# Average ACCHO Exposure by Monitoring Station

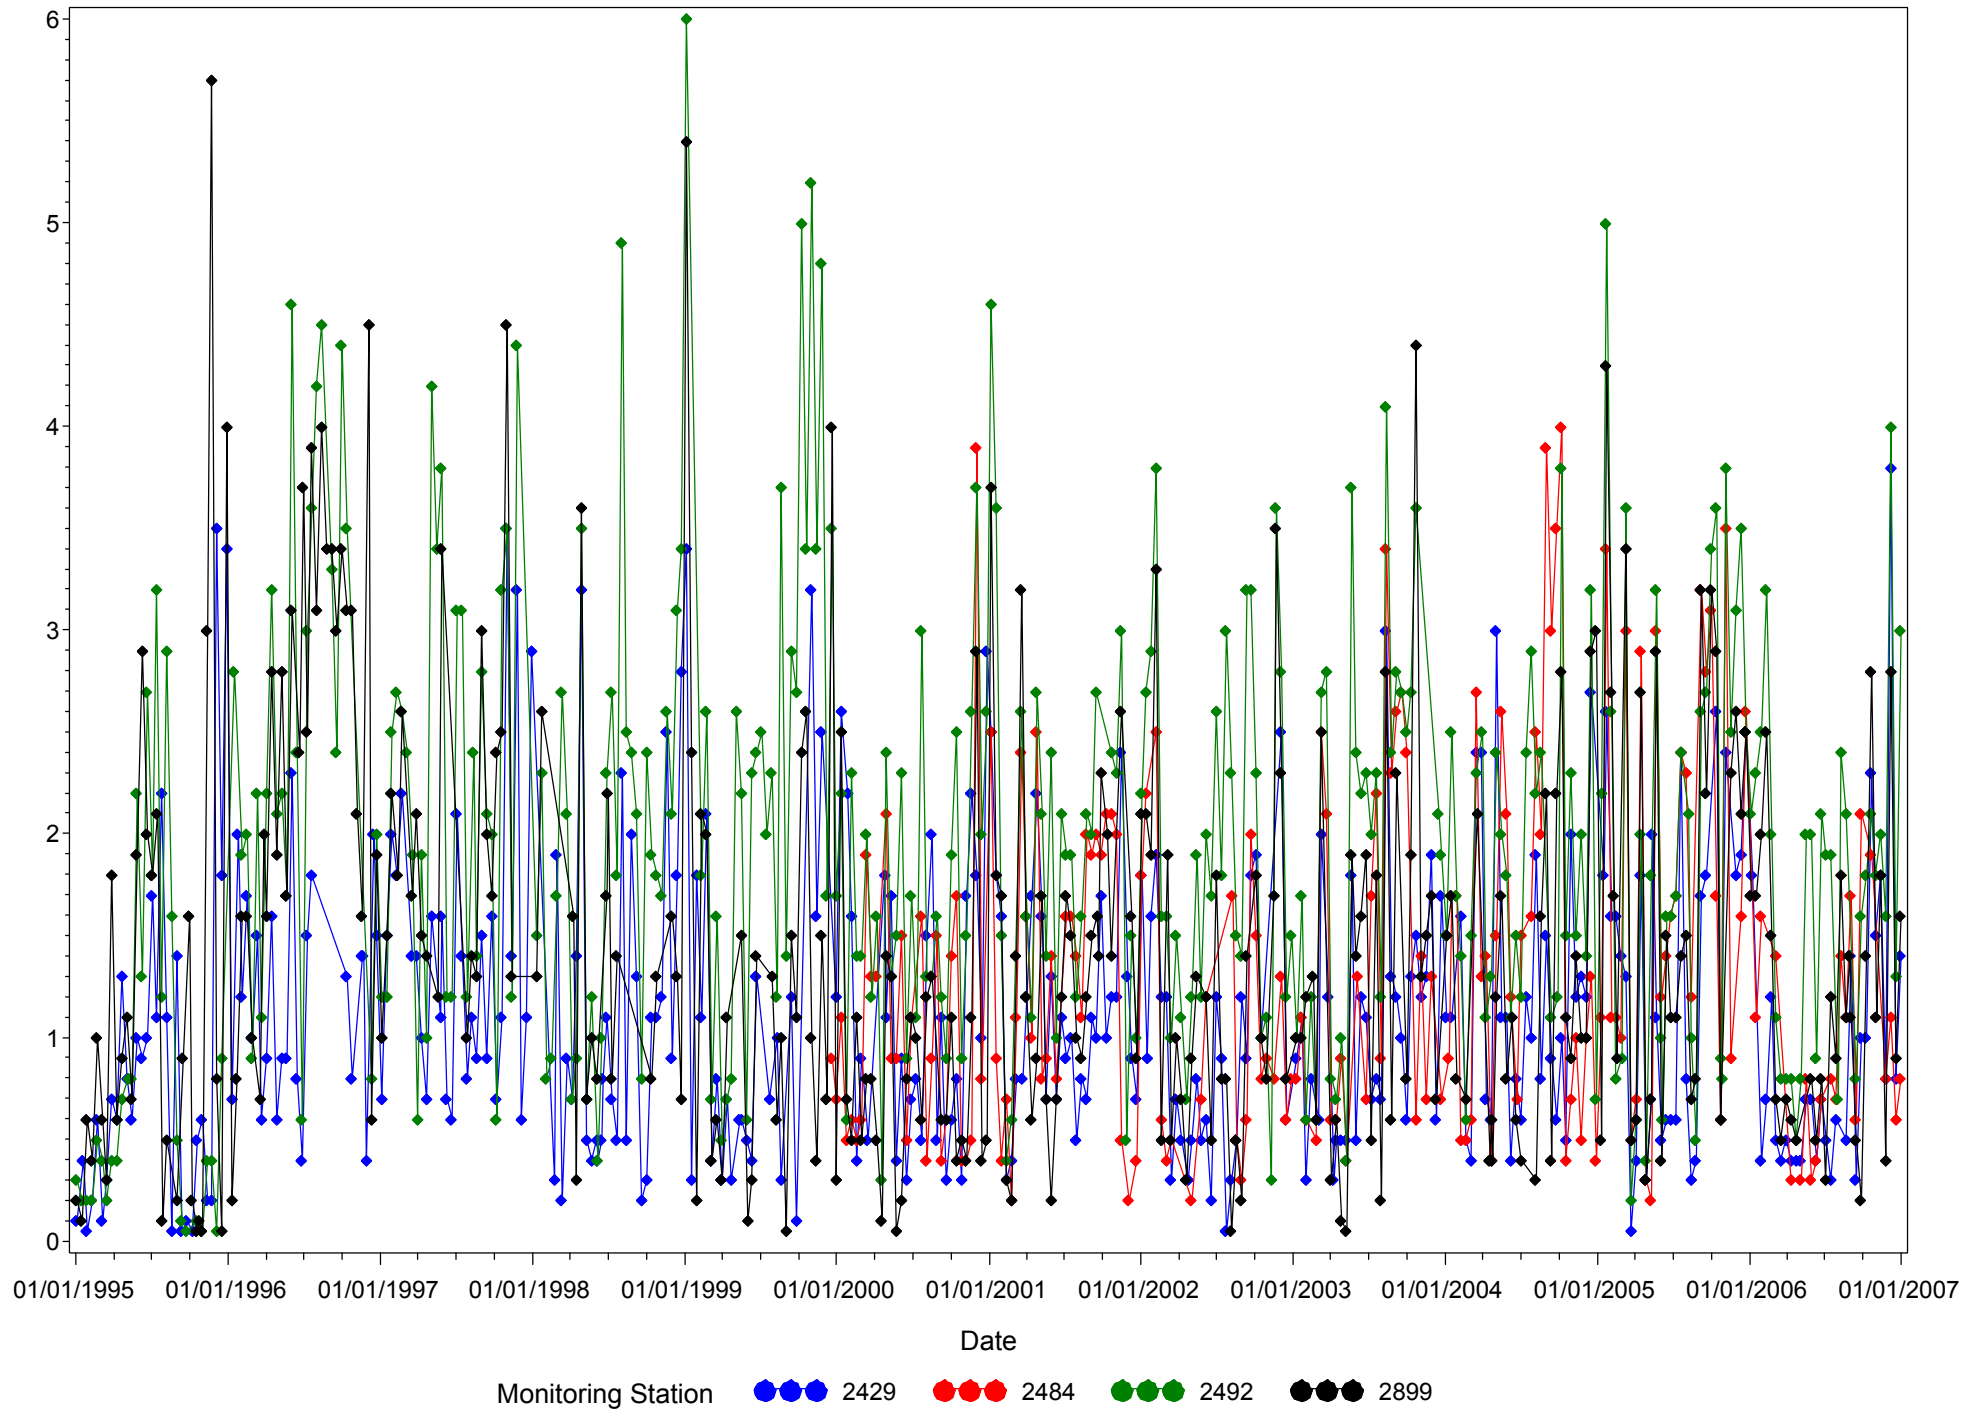

# Average BENZ Exposure by Monitoring Station

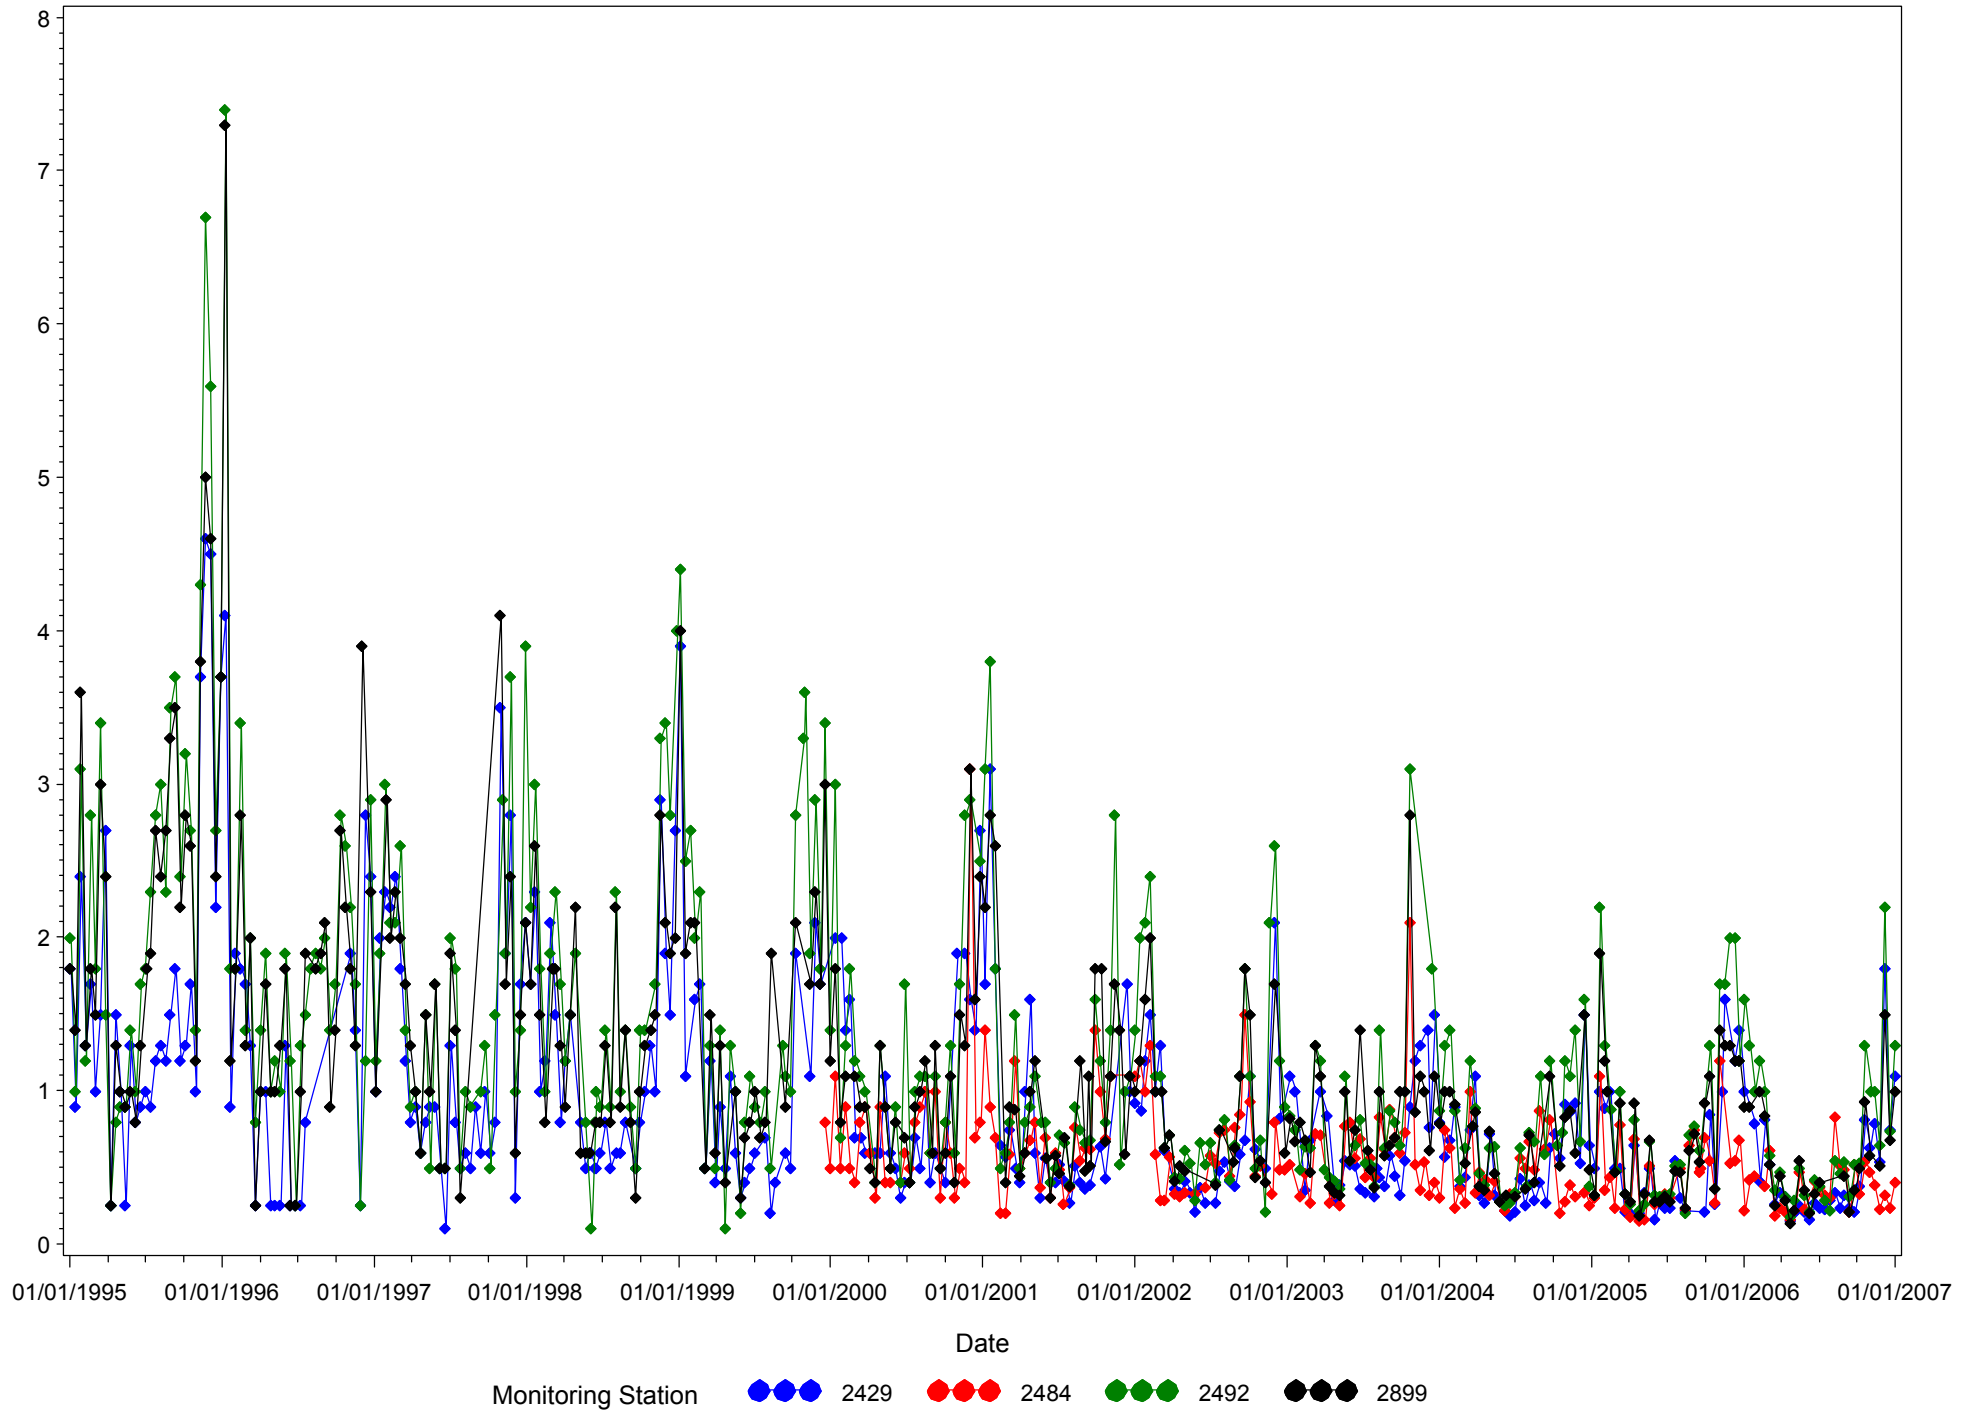

# Average BUTA Exposure by Monitoring Station

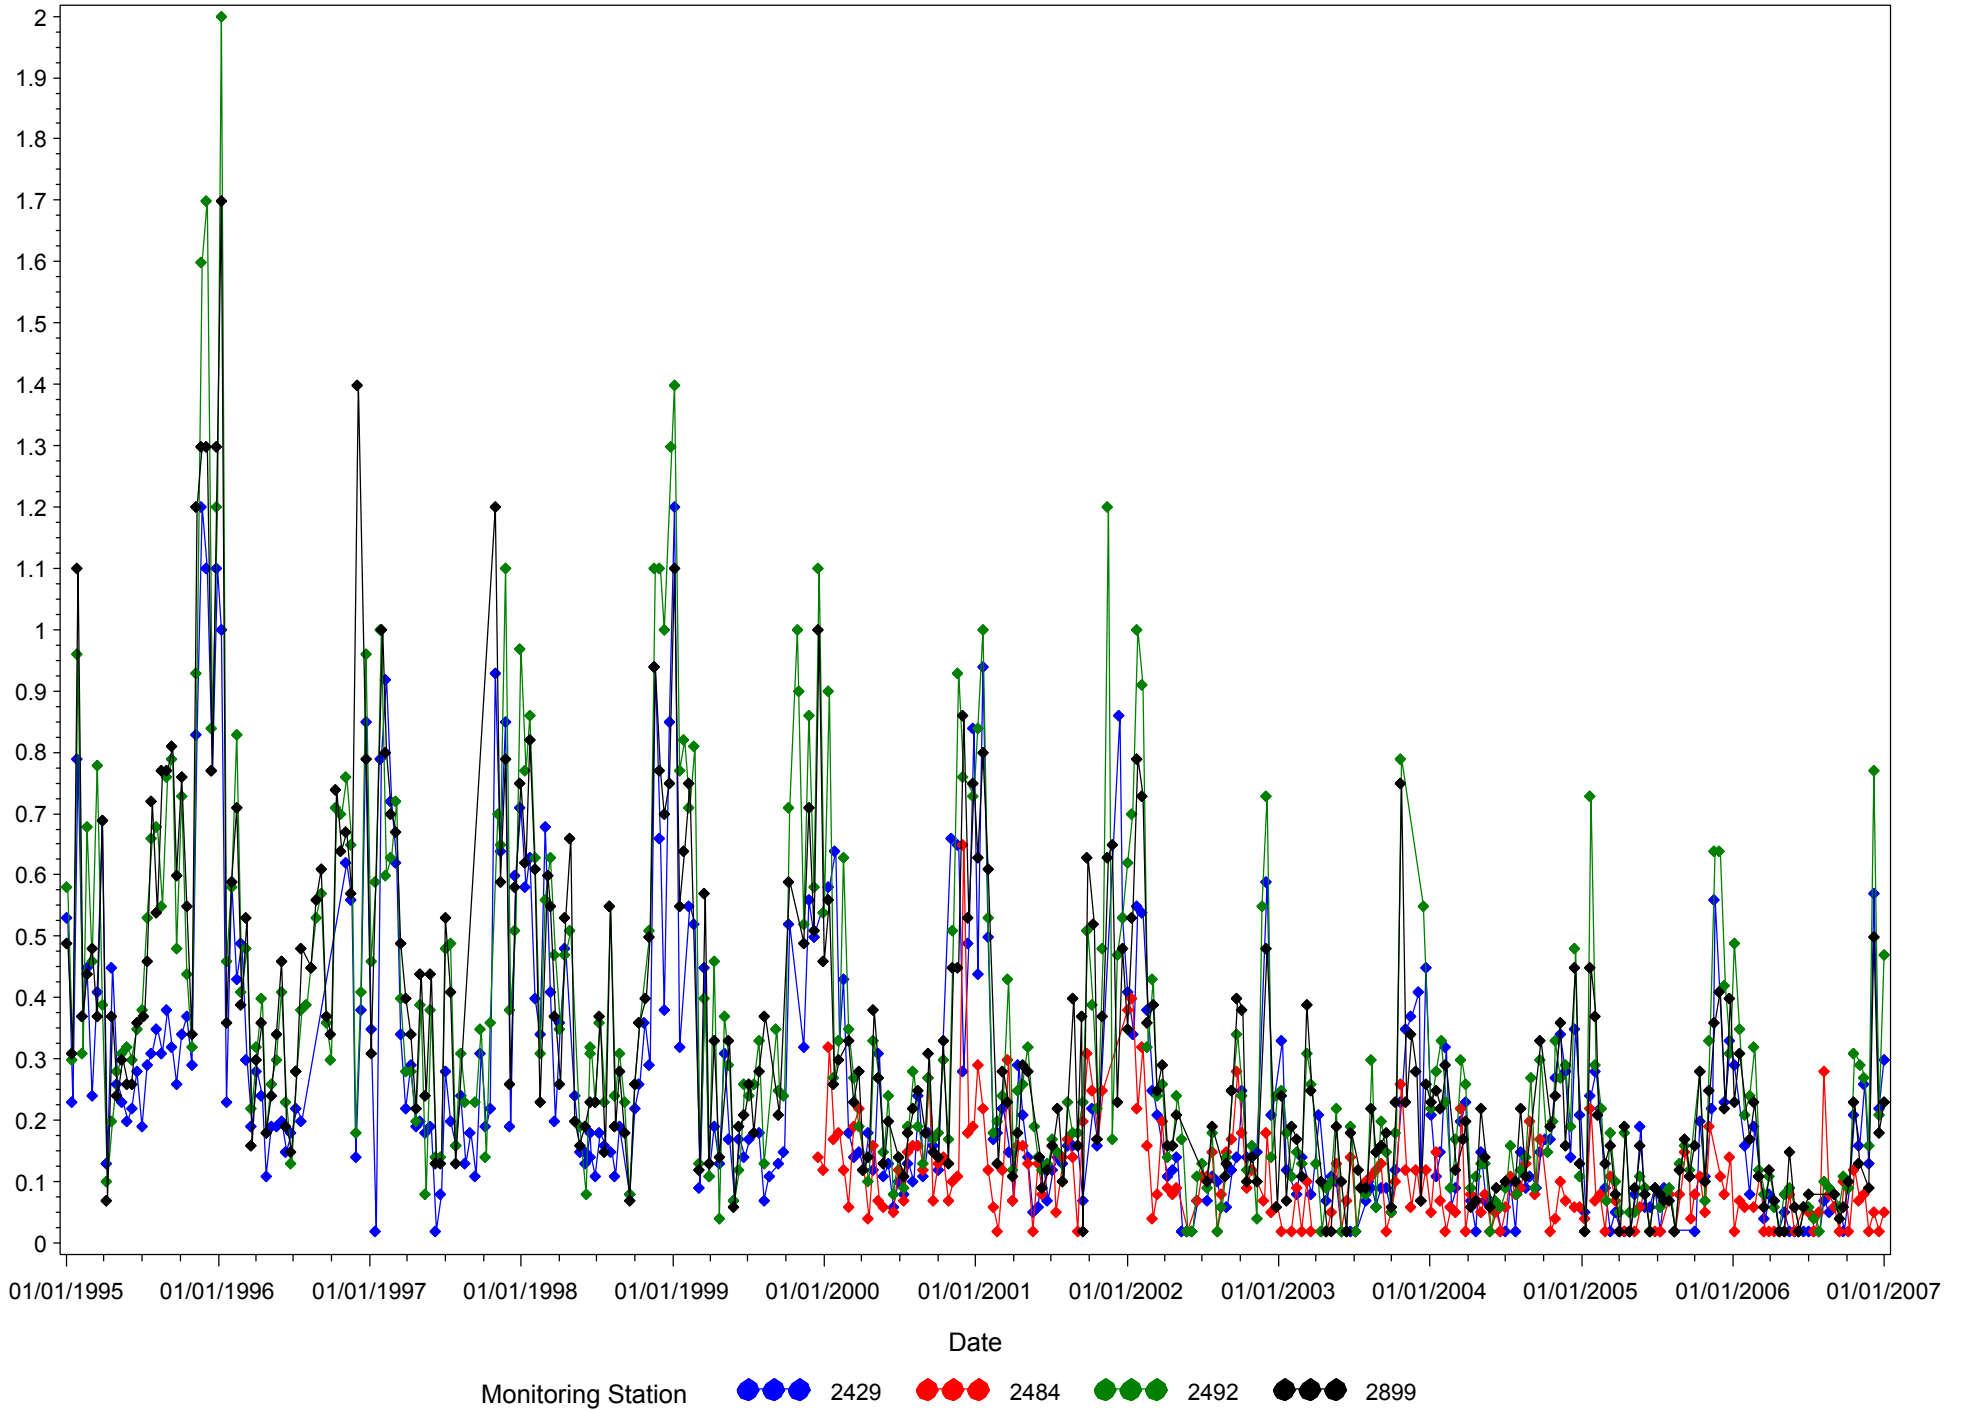

# Average CHCL3 Exposure by Monitoring Station

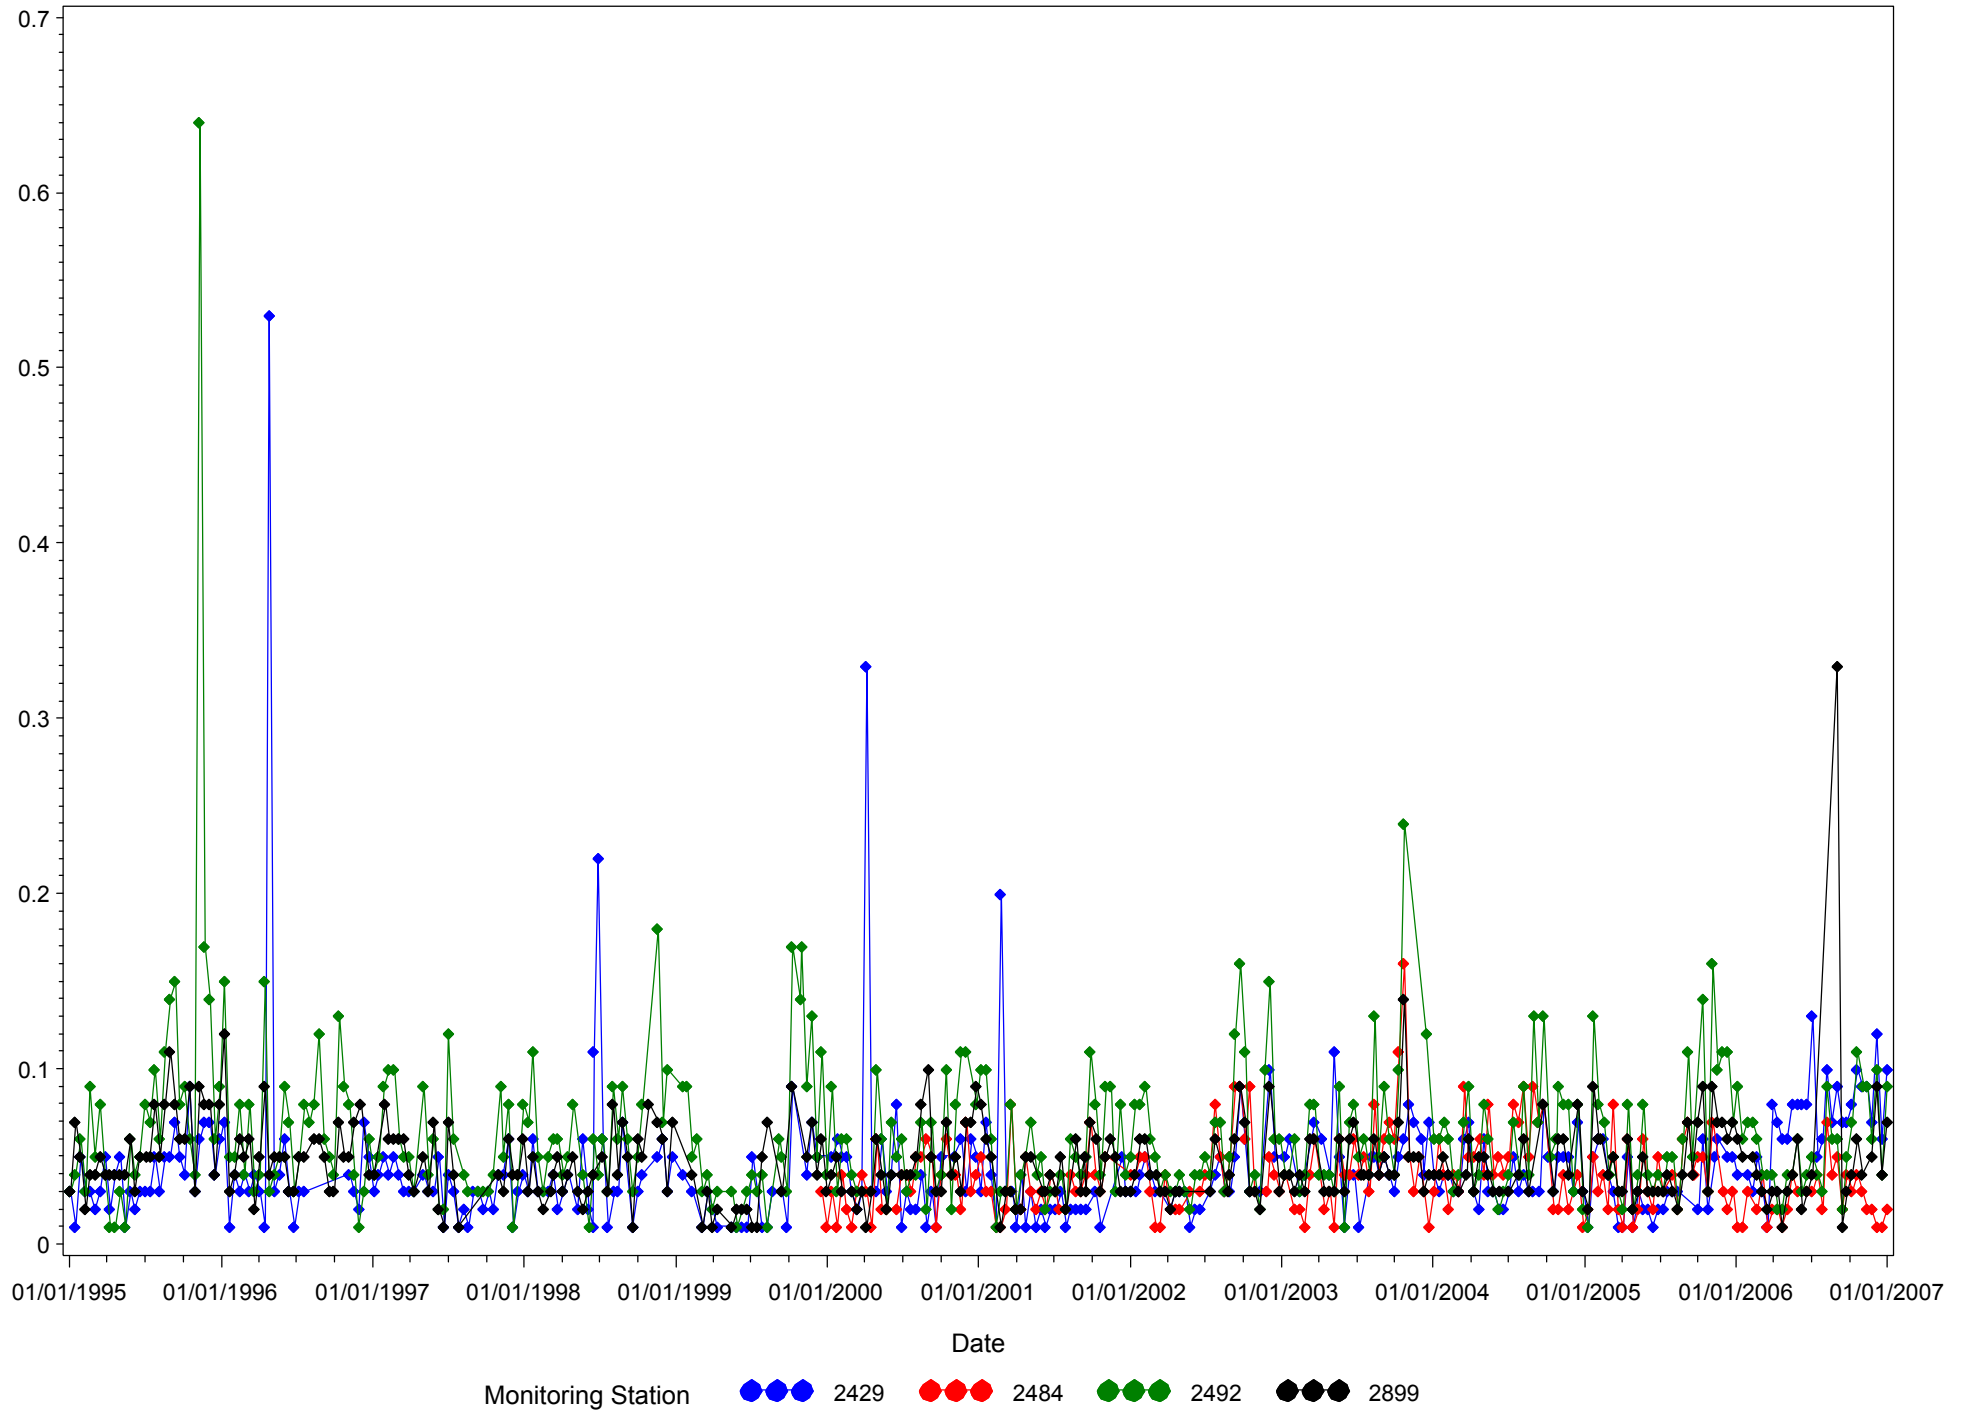

# Average CR6 Exposure by Monitoring Station

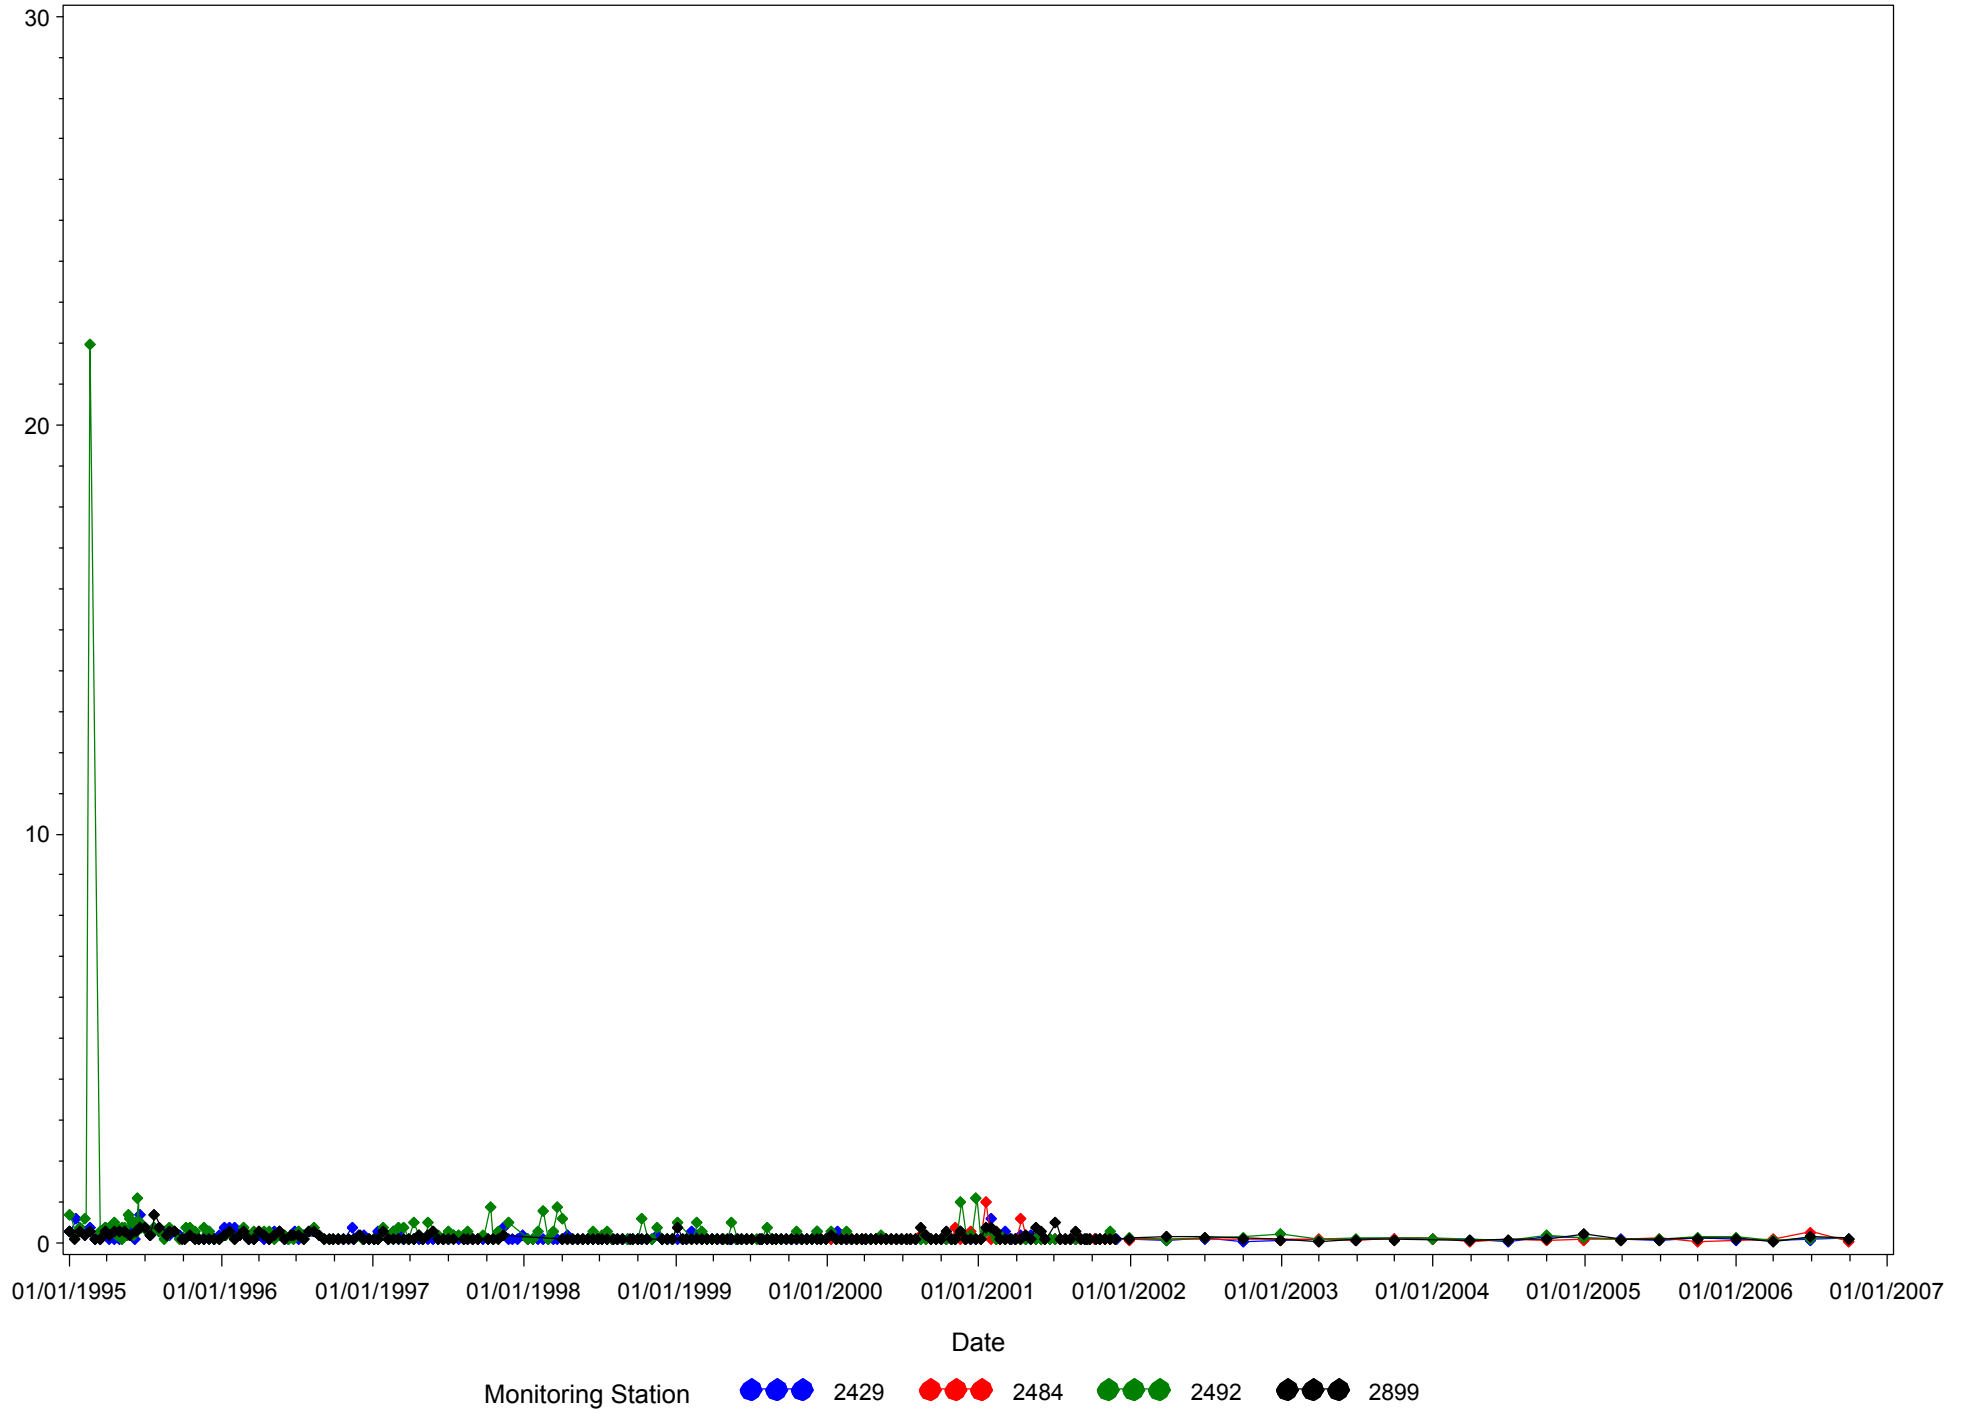

# Average CR Exposure by Monitoring Station

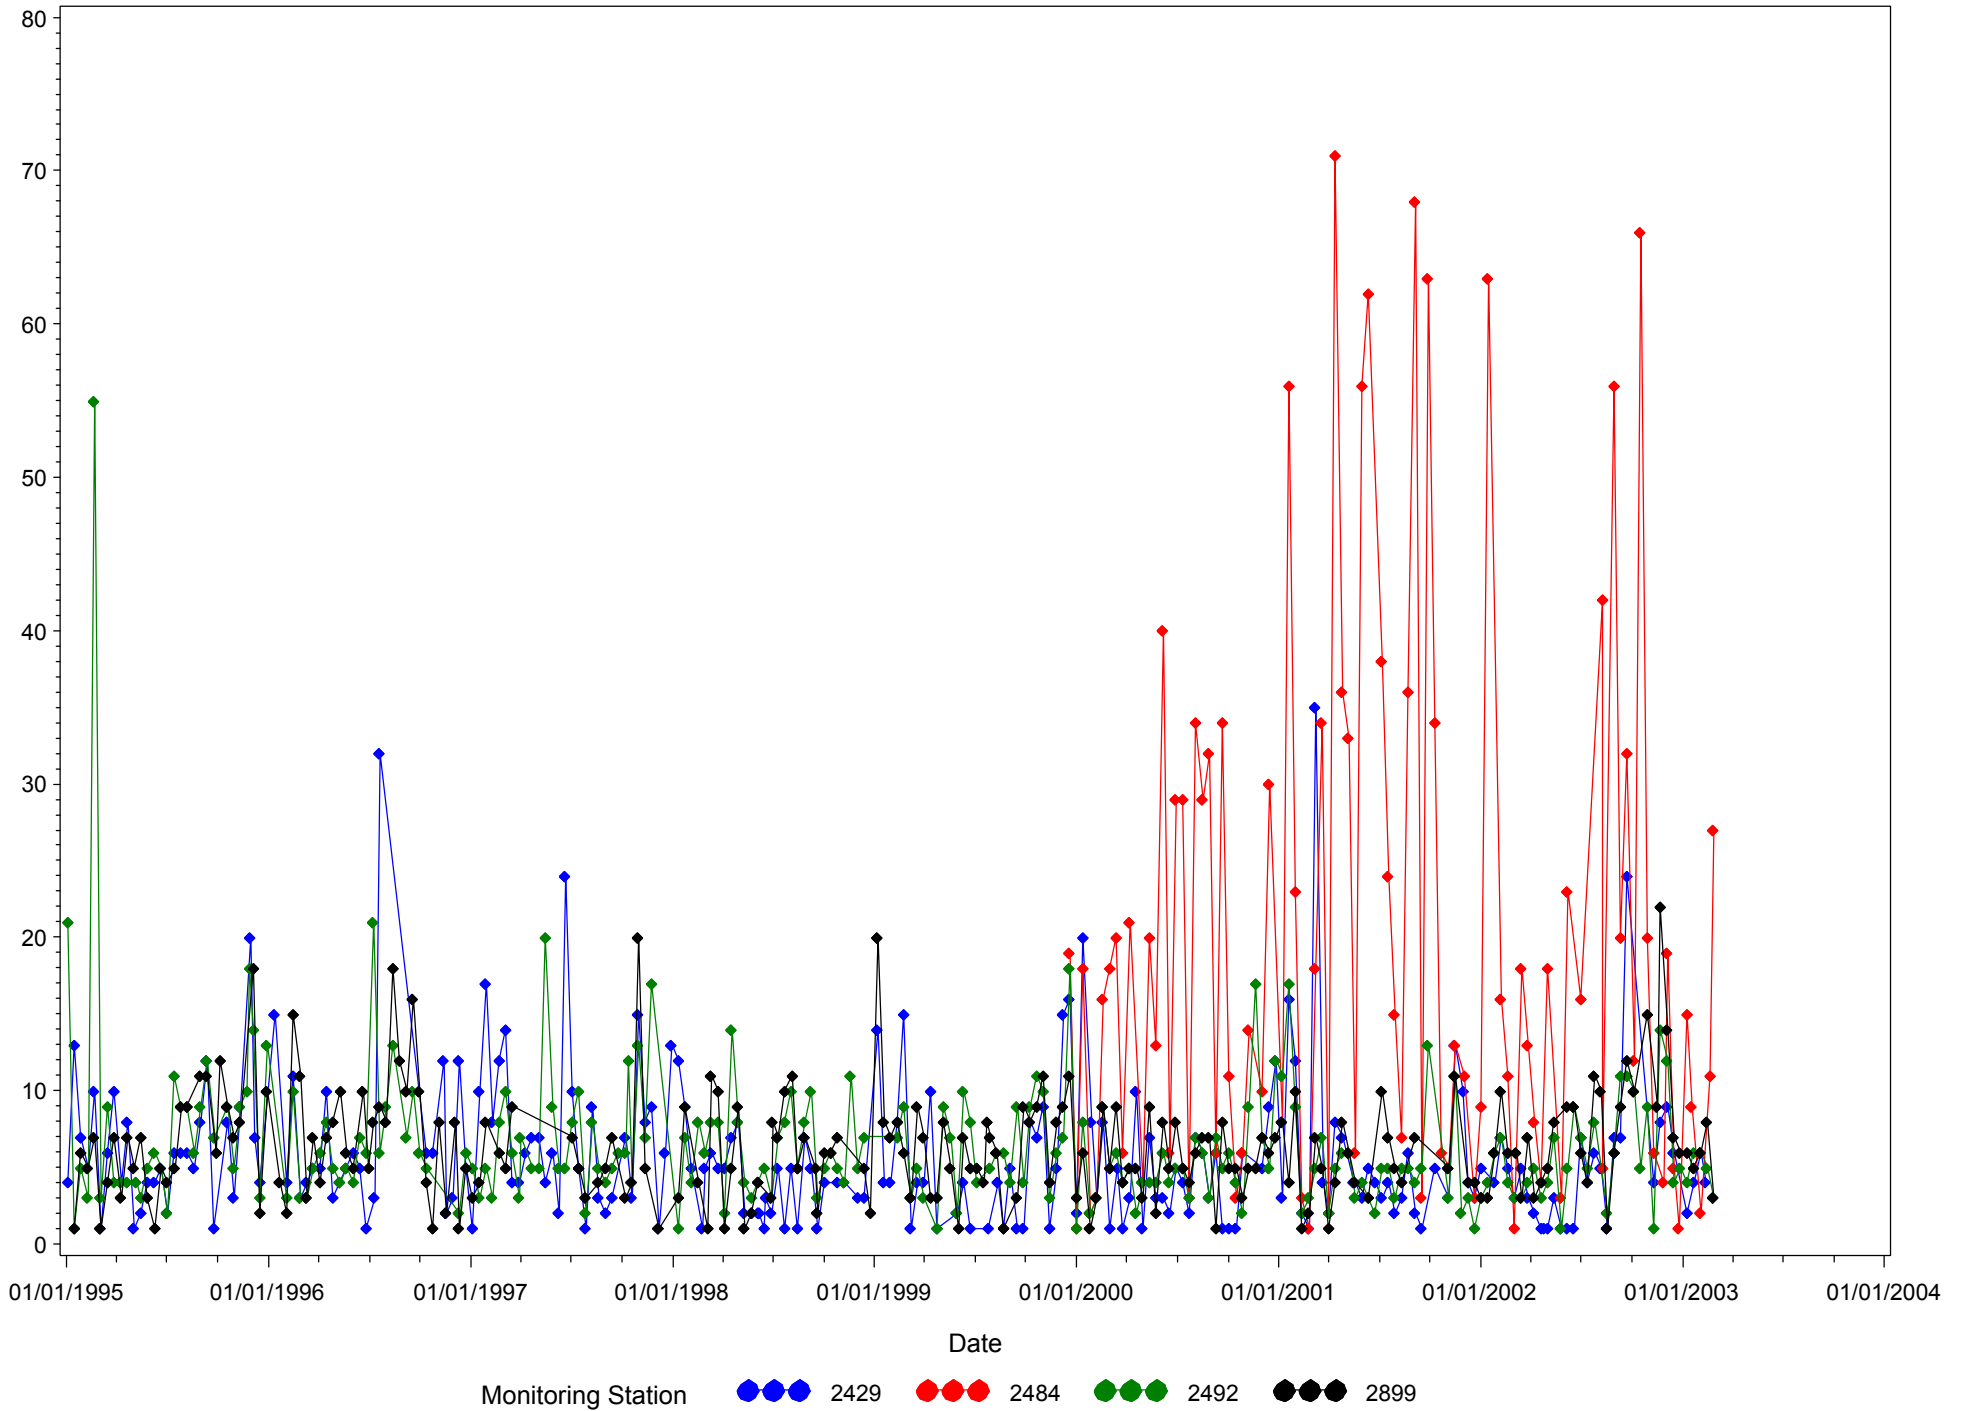



# Average CU Exposure by Monitoring Station

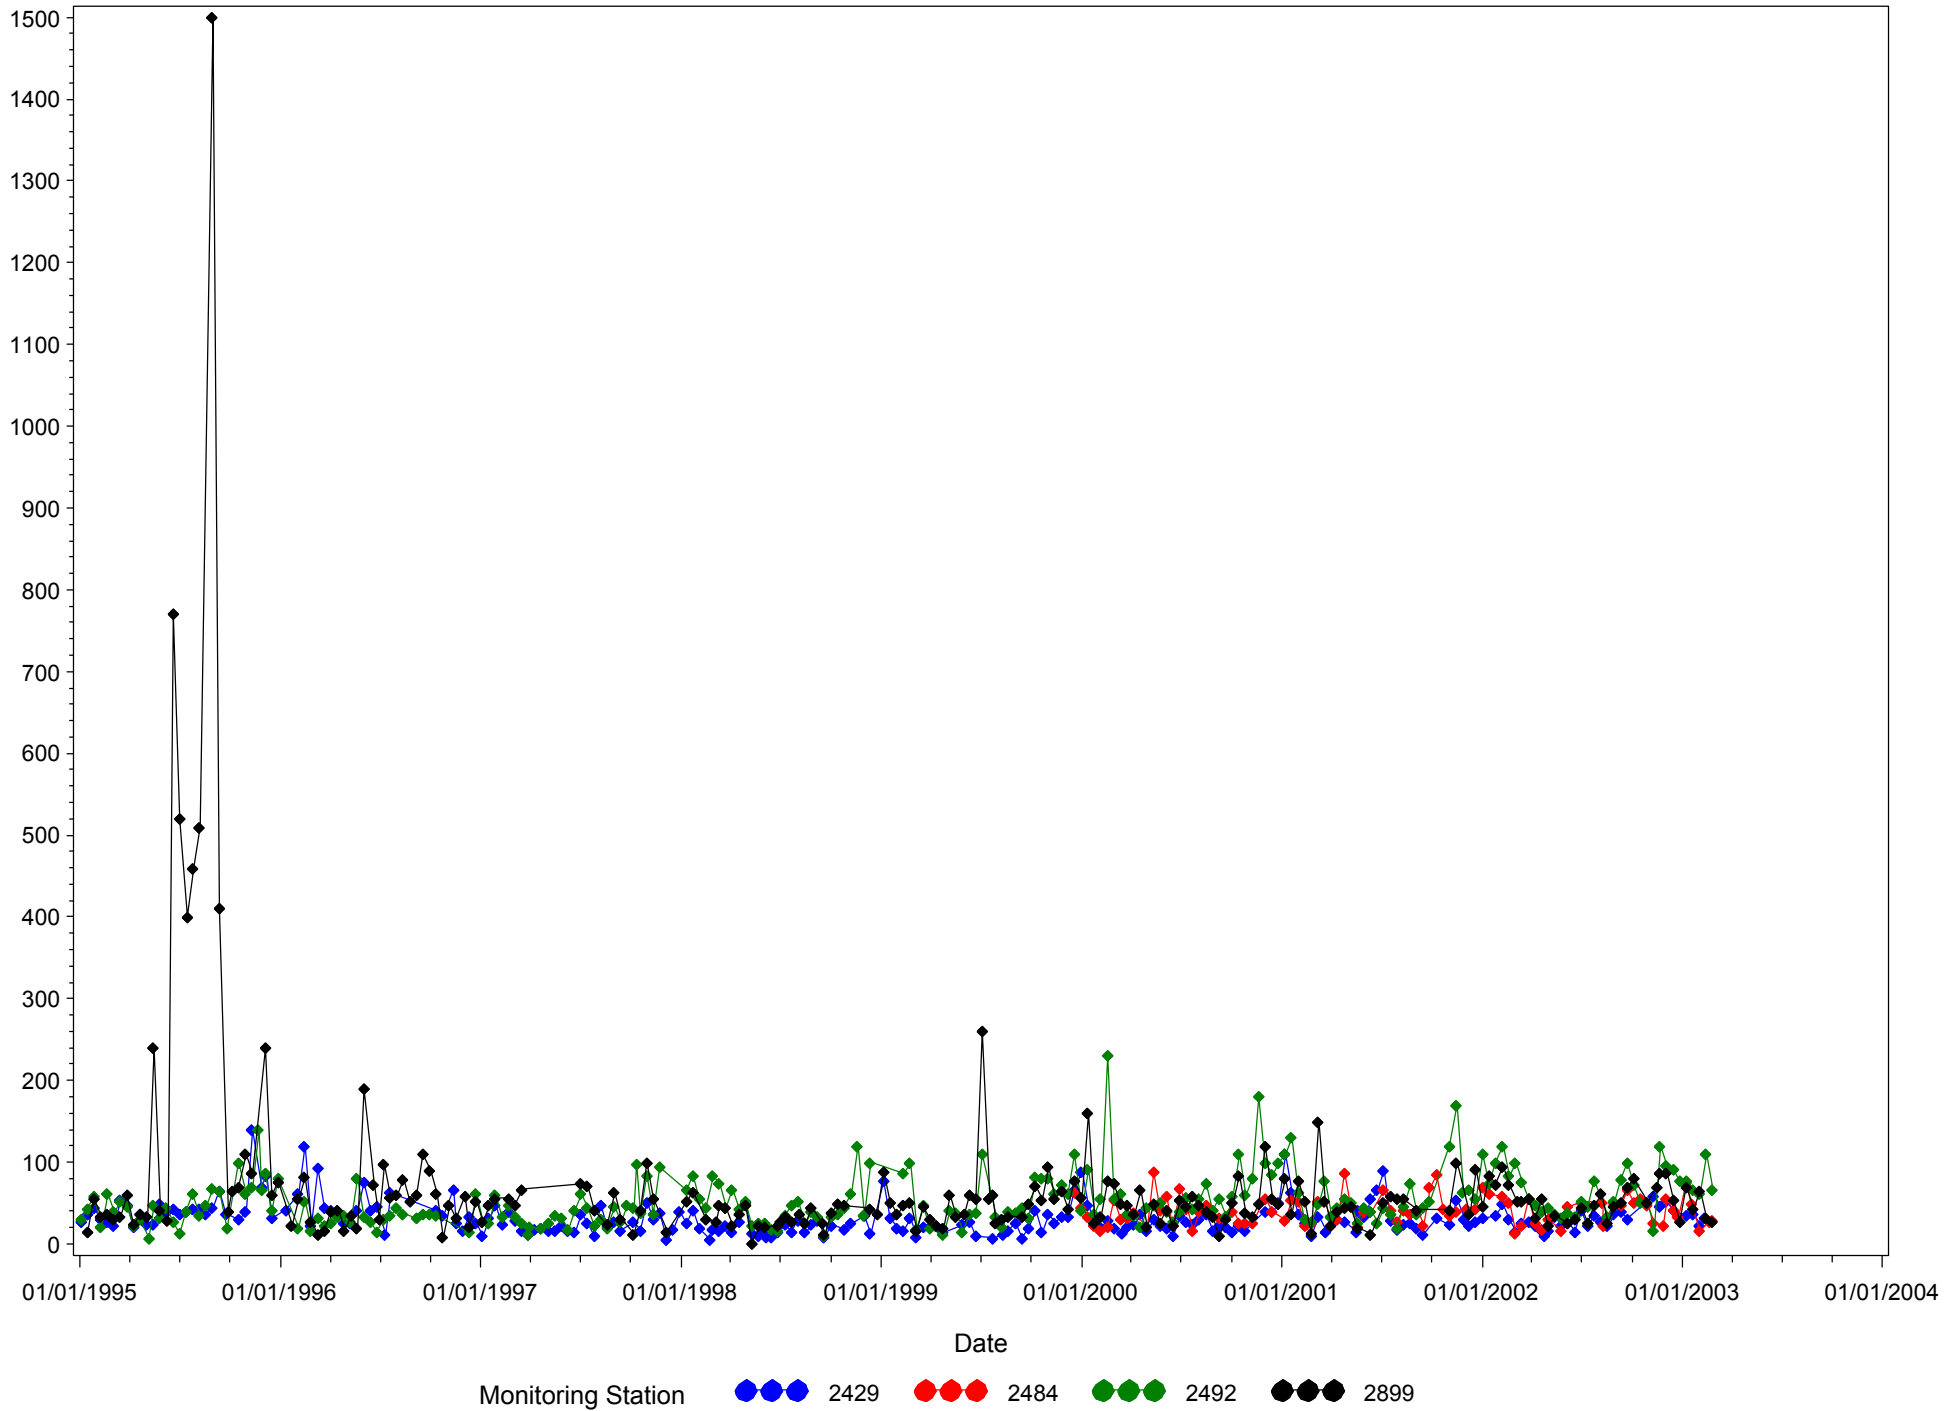

# Average DCM Exposure by Monitoring Station

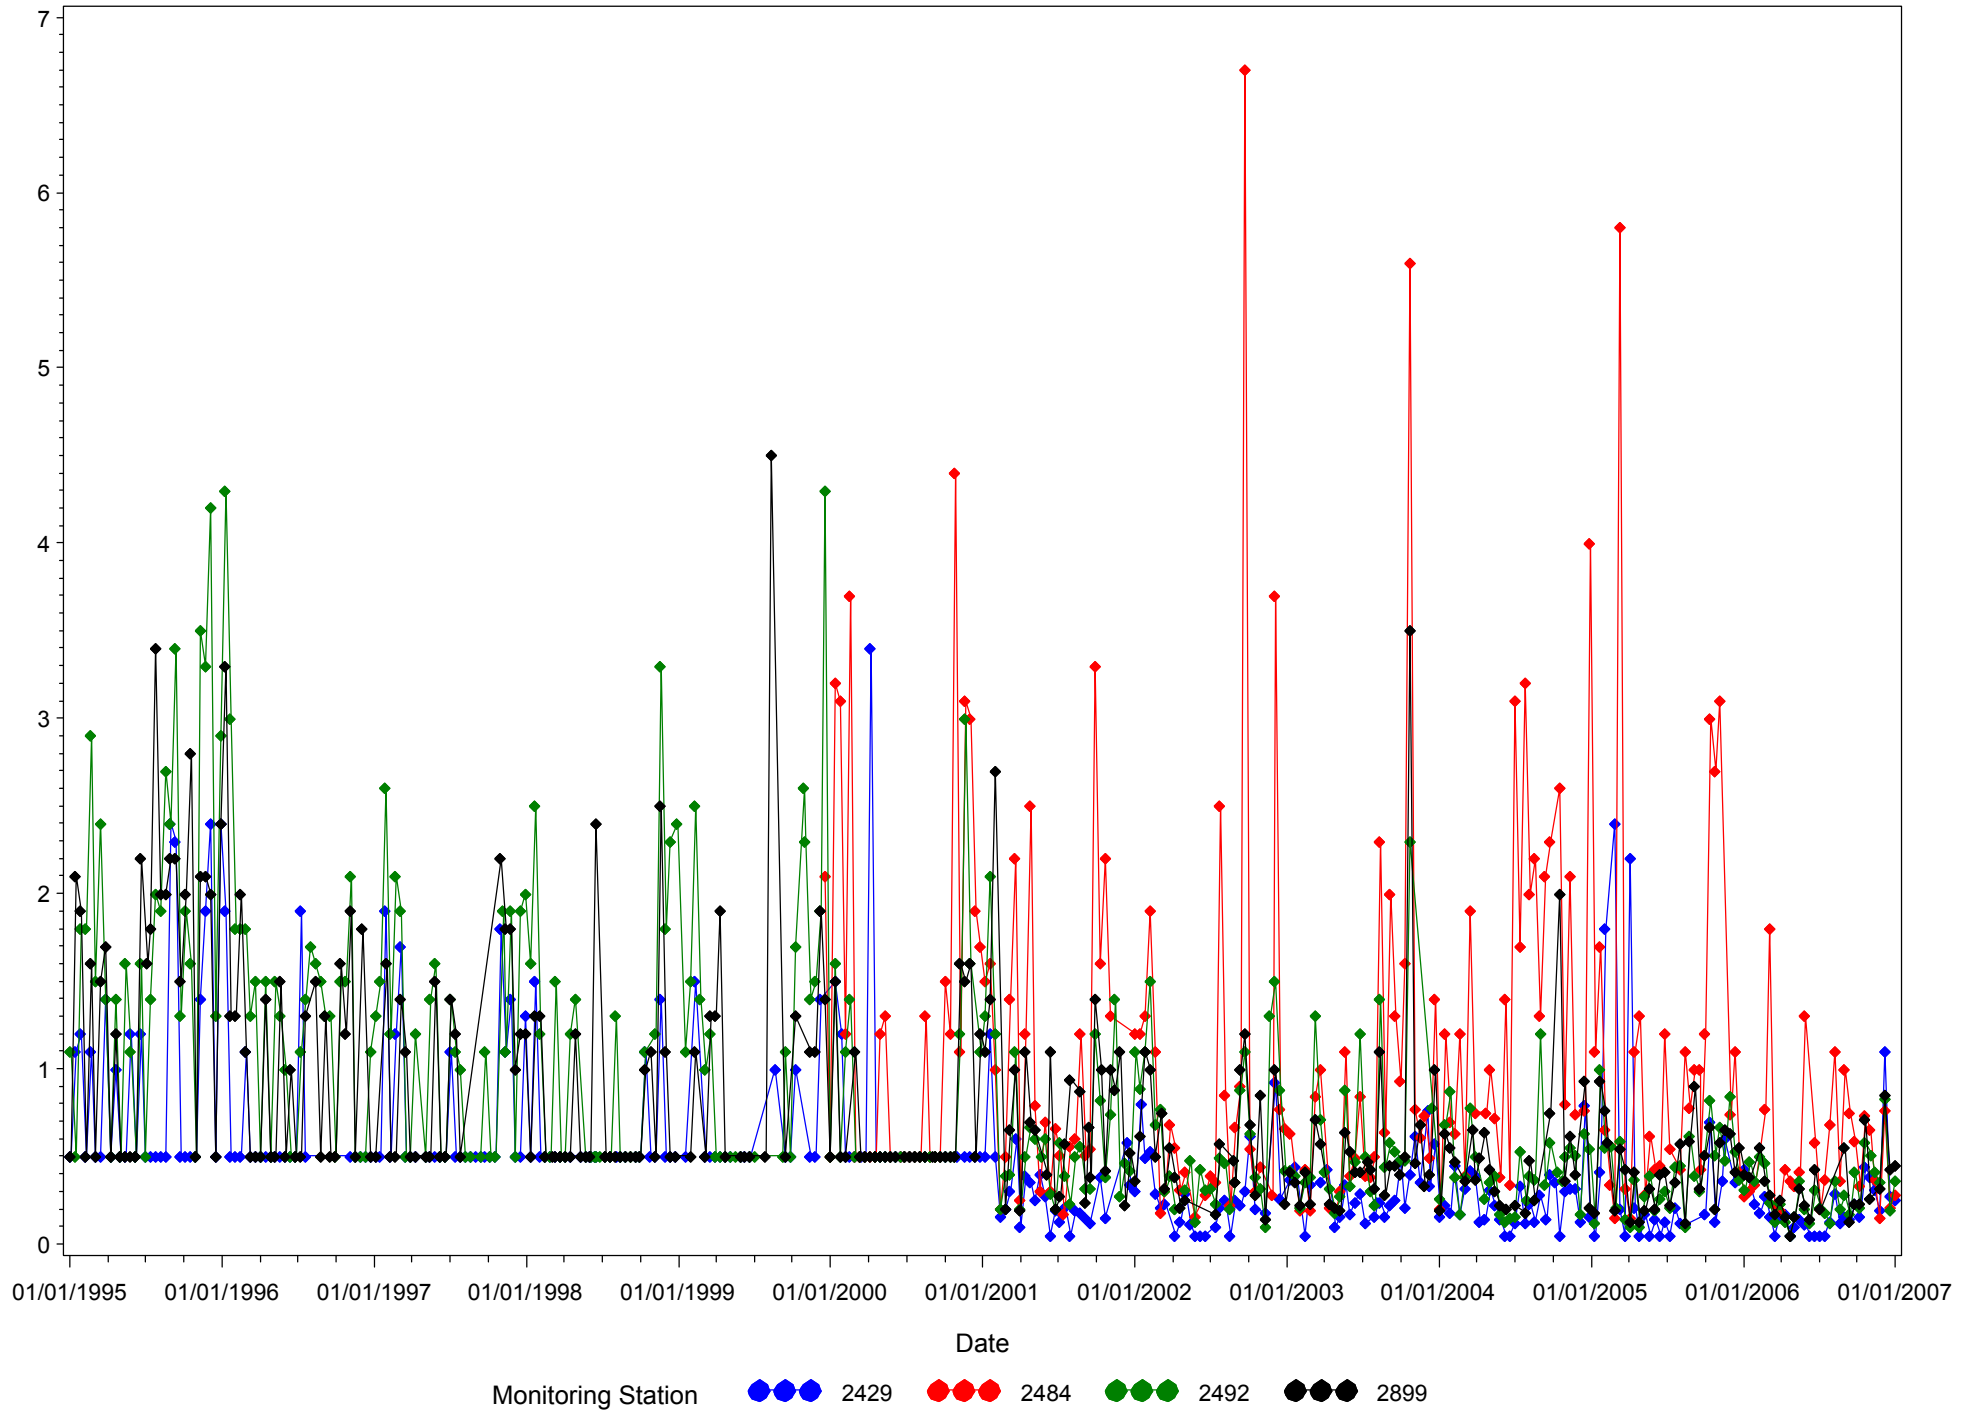

# Average EBZ Exposure by Monitoring Station

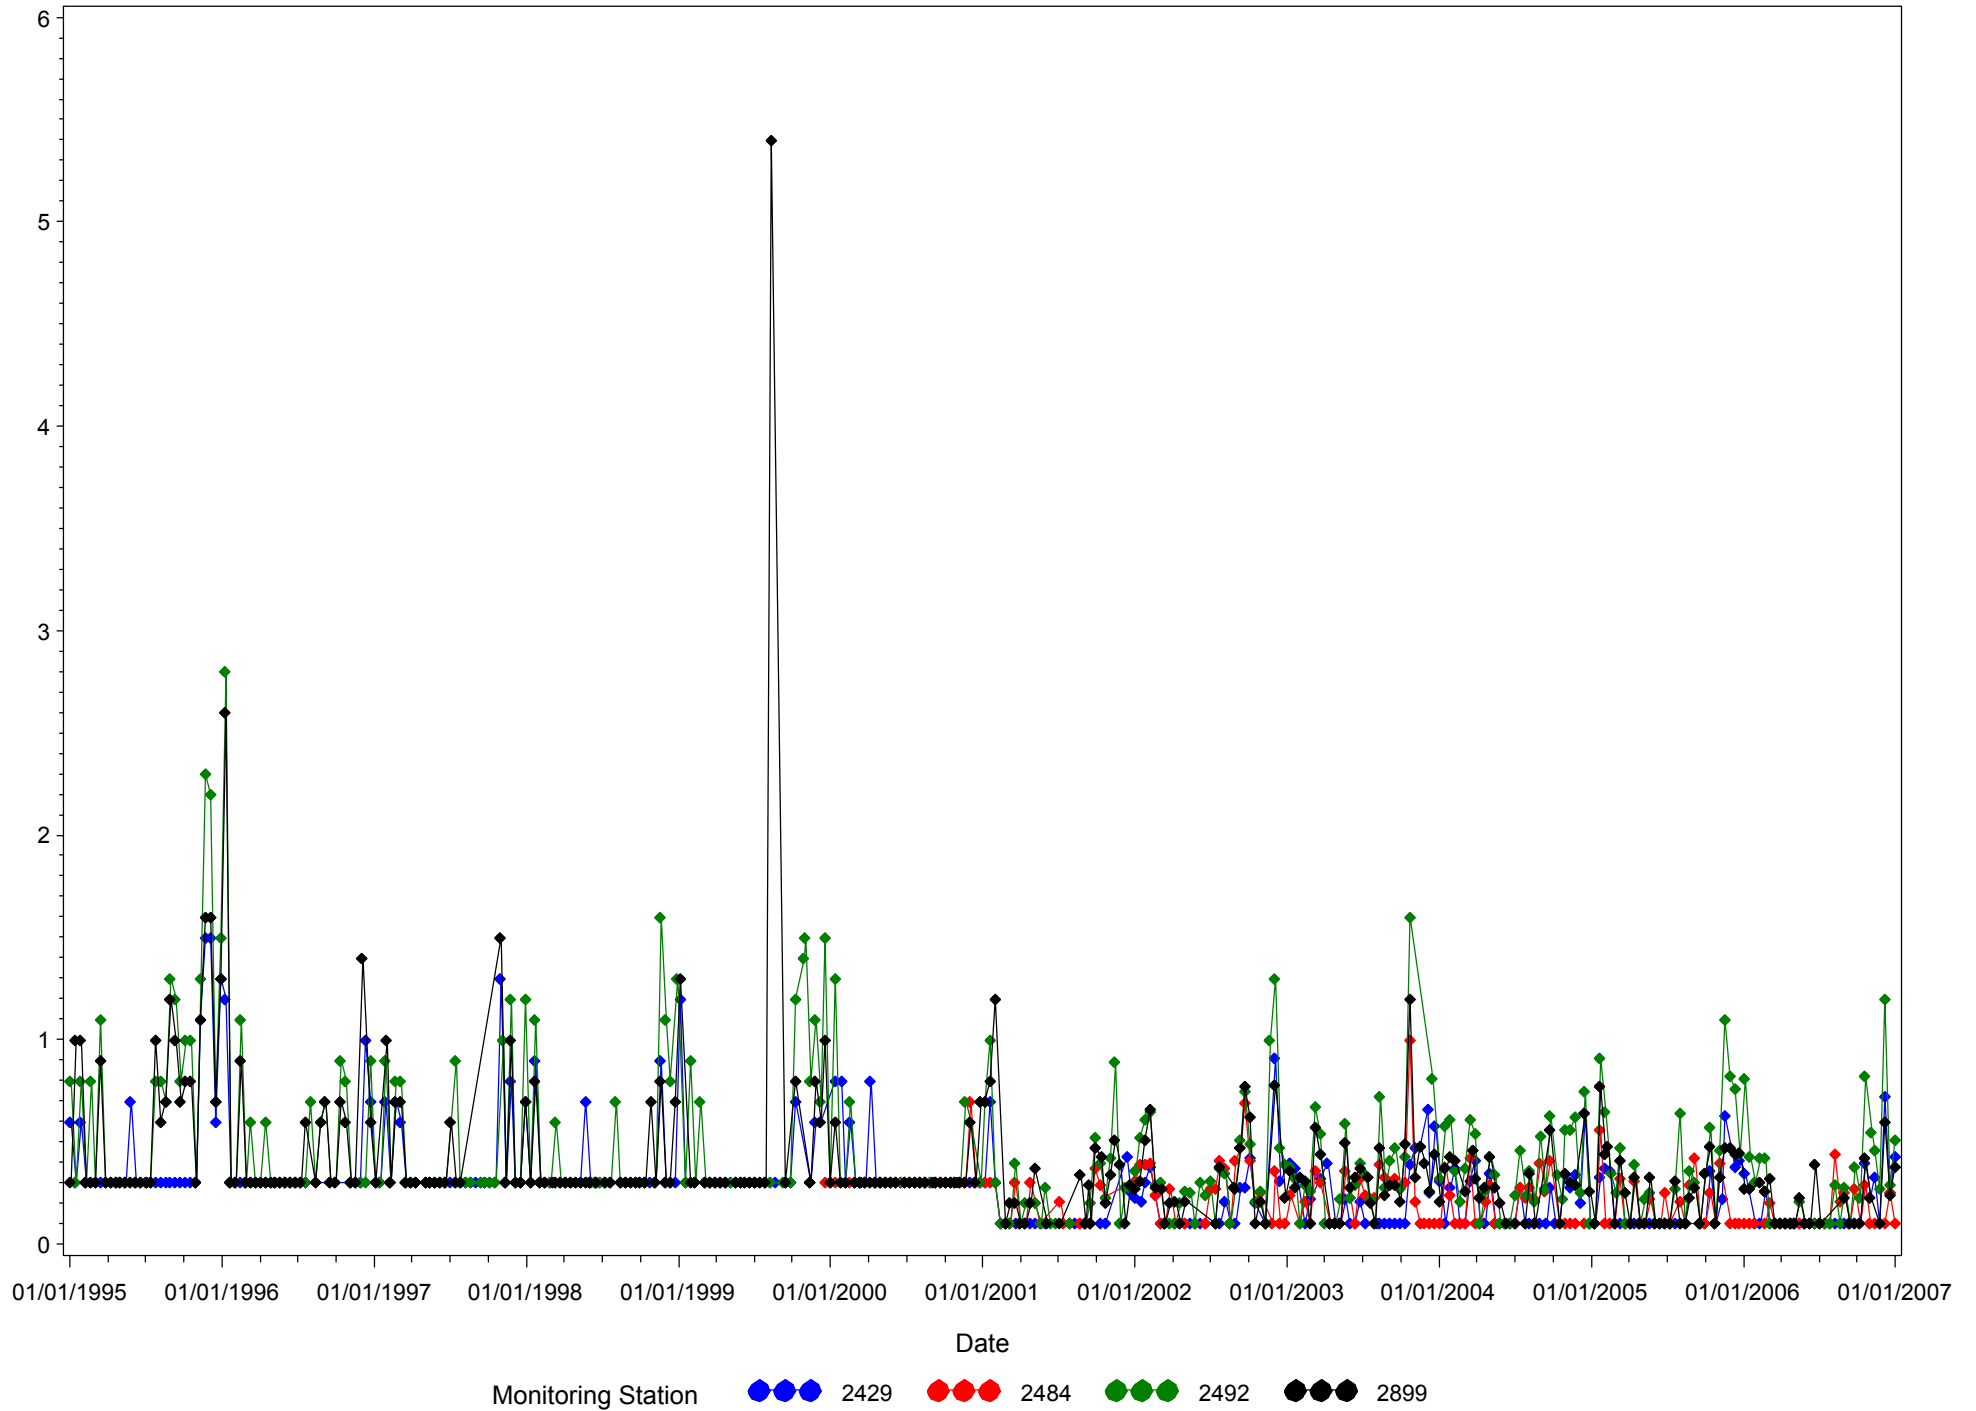

## Average HCHO Exposure by Monitoring Station

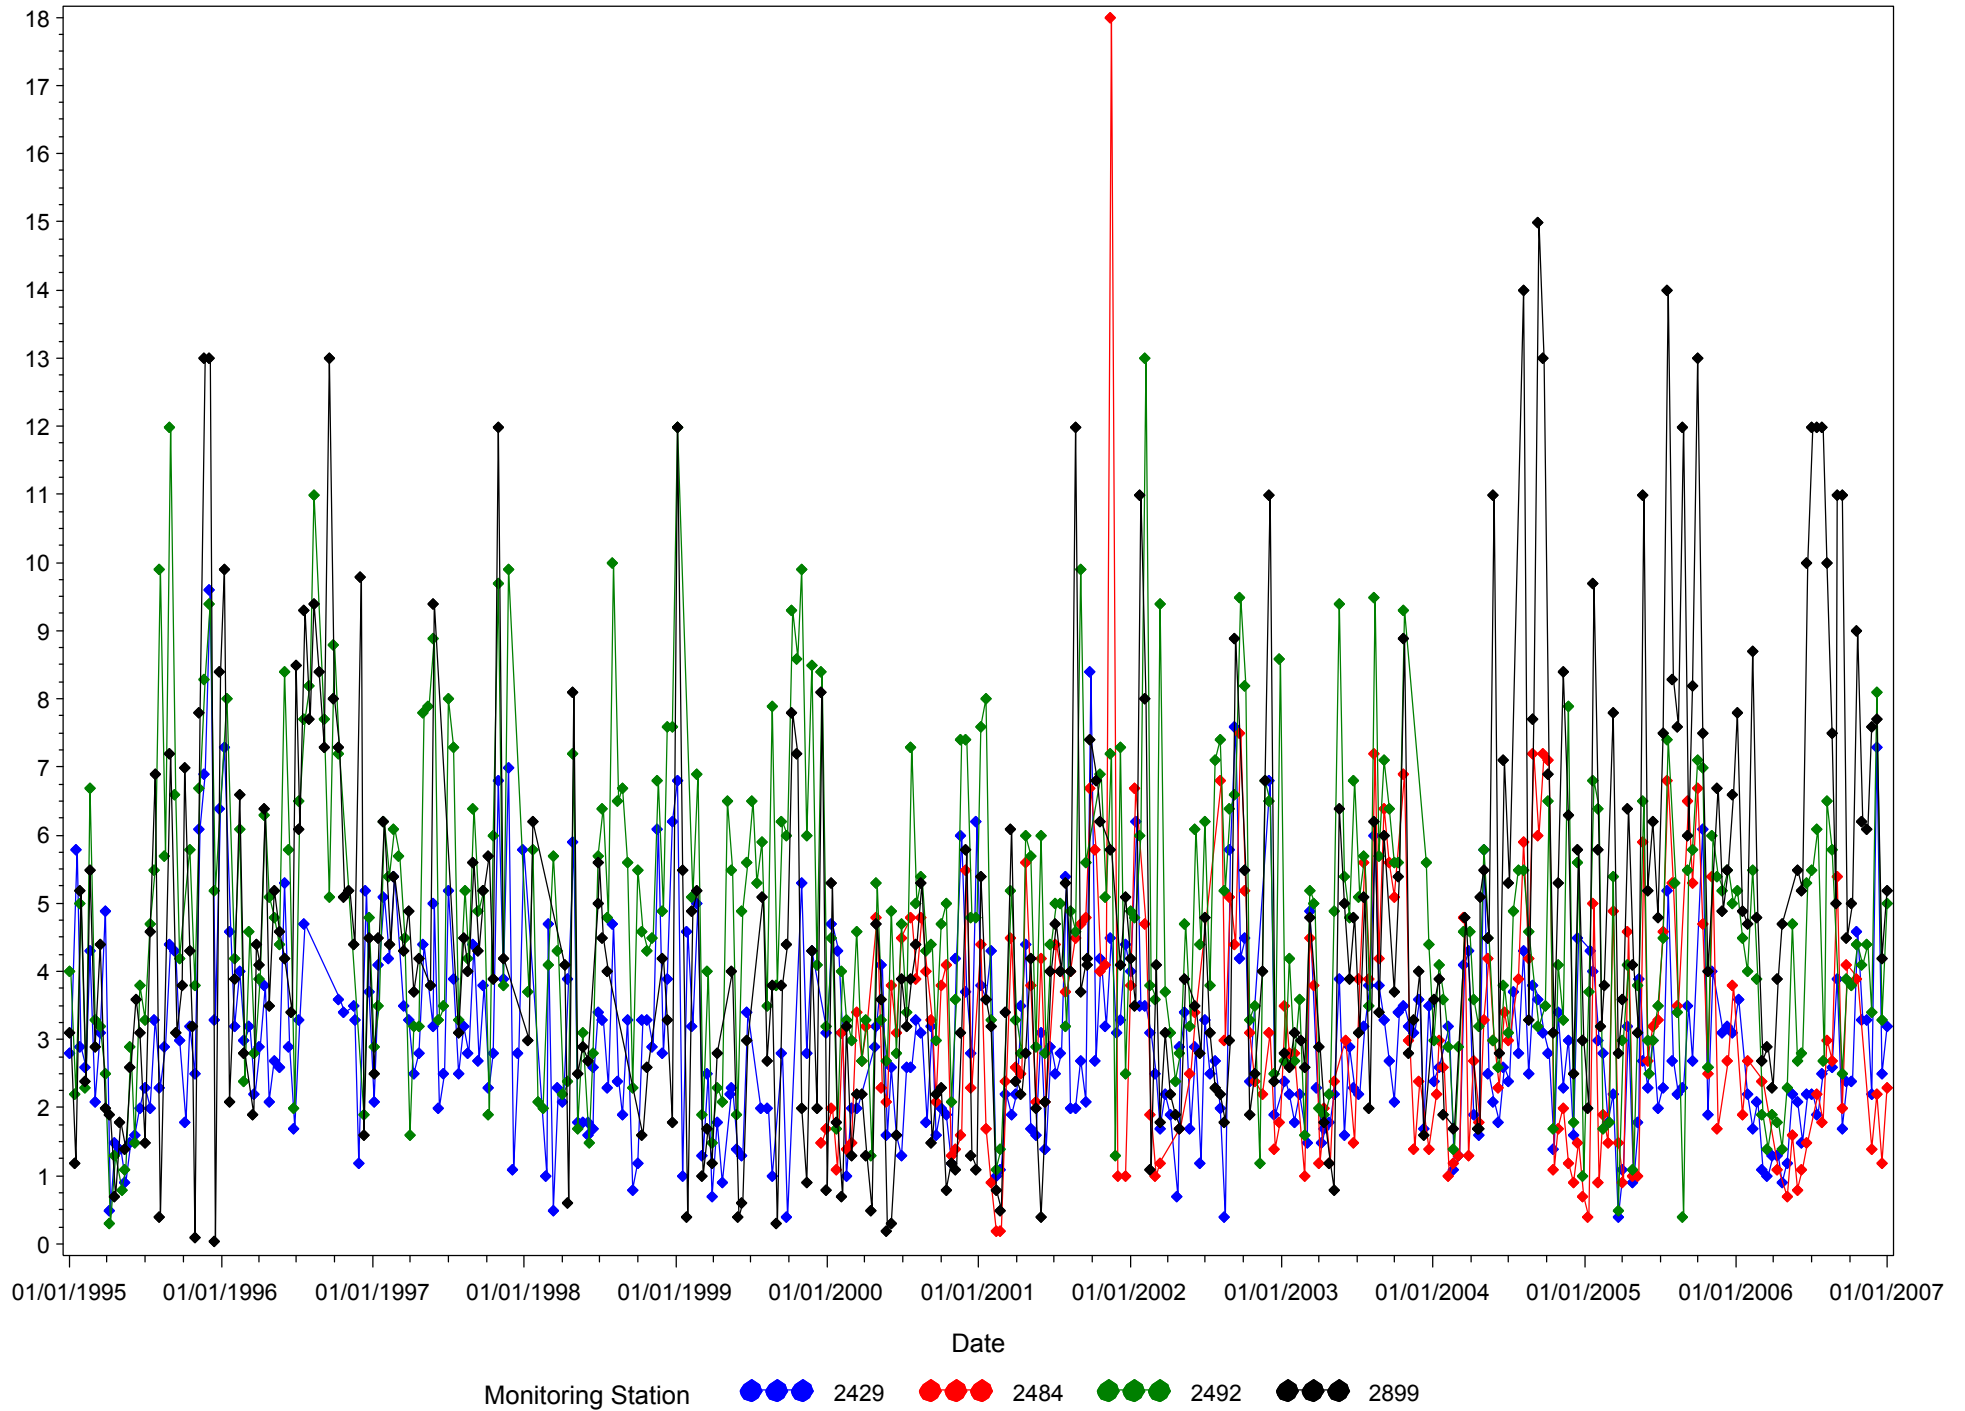

# Average MN Exposure by Monitoring Station

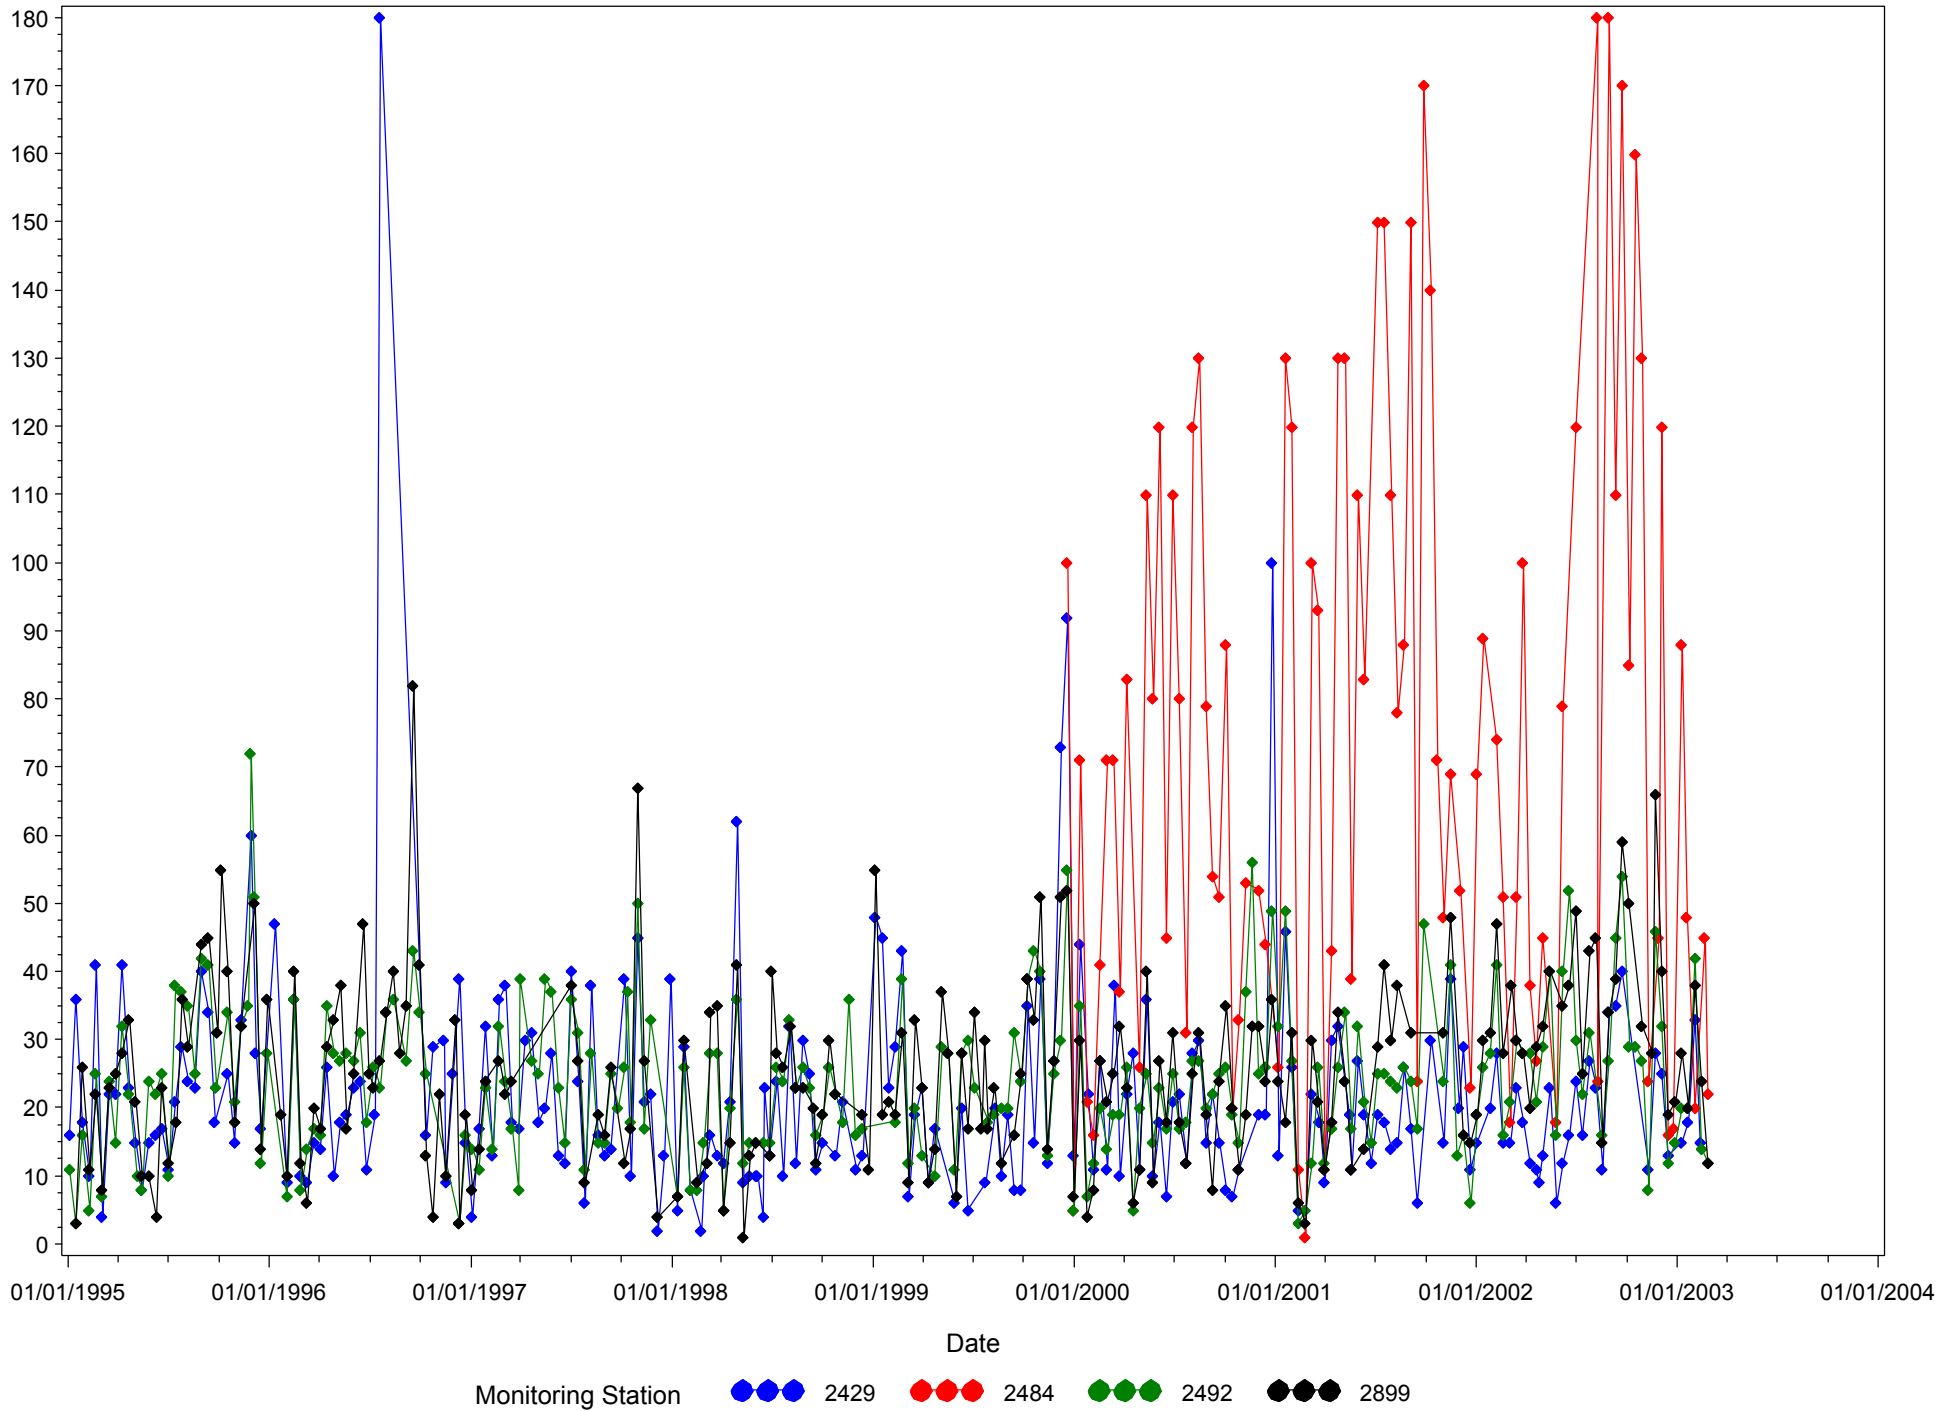

# Average MO Exposure by Monitoring Station

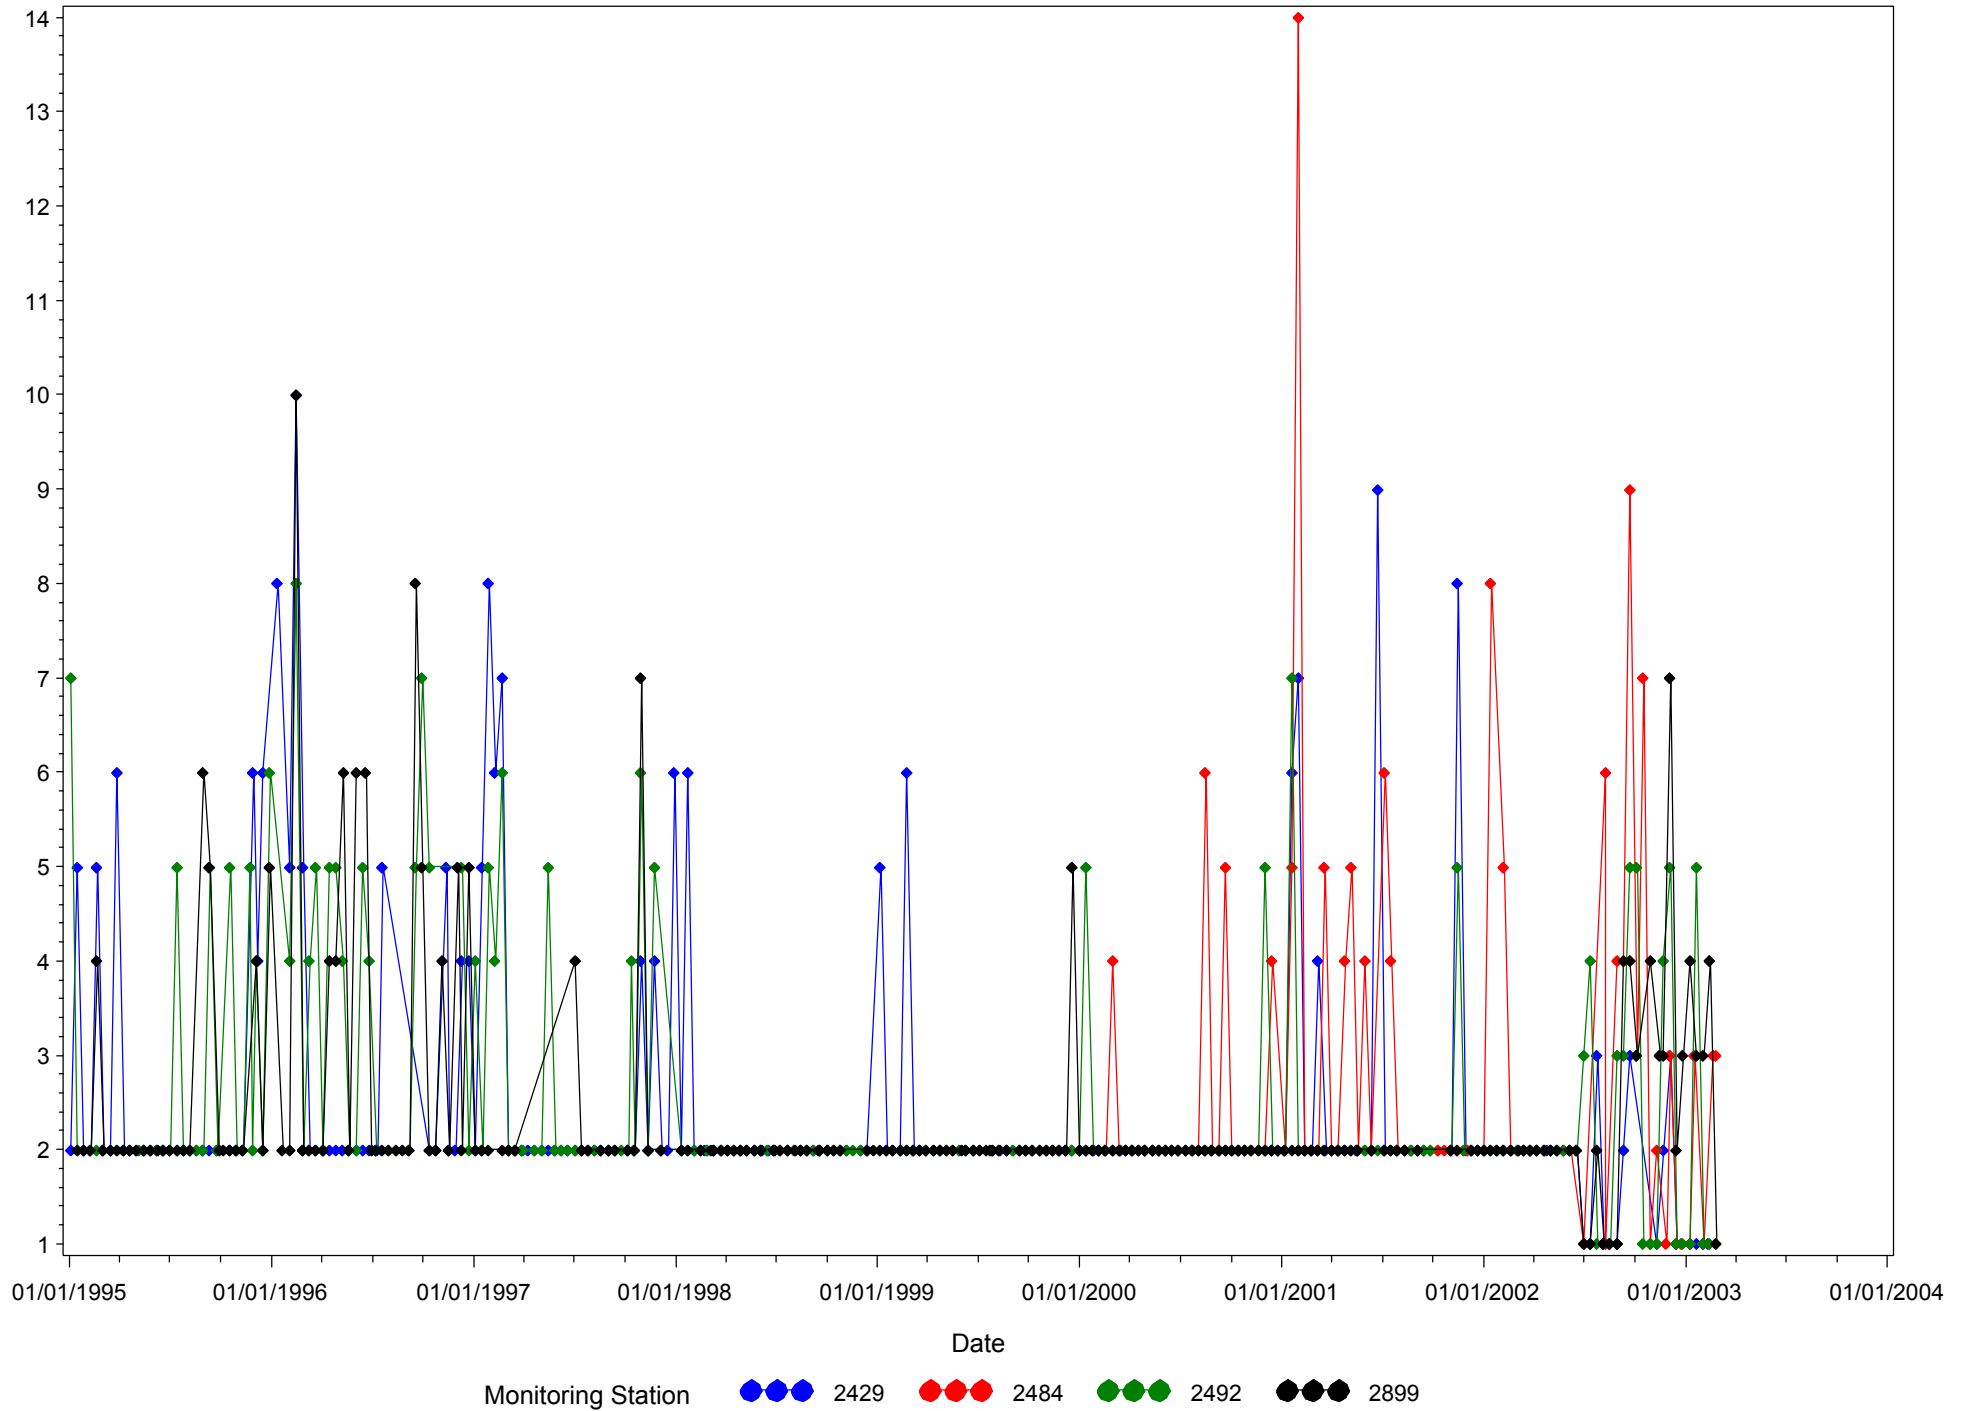

# Average MPXYL Exposure by Monitoring Station

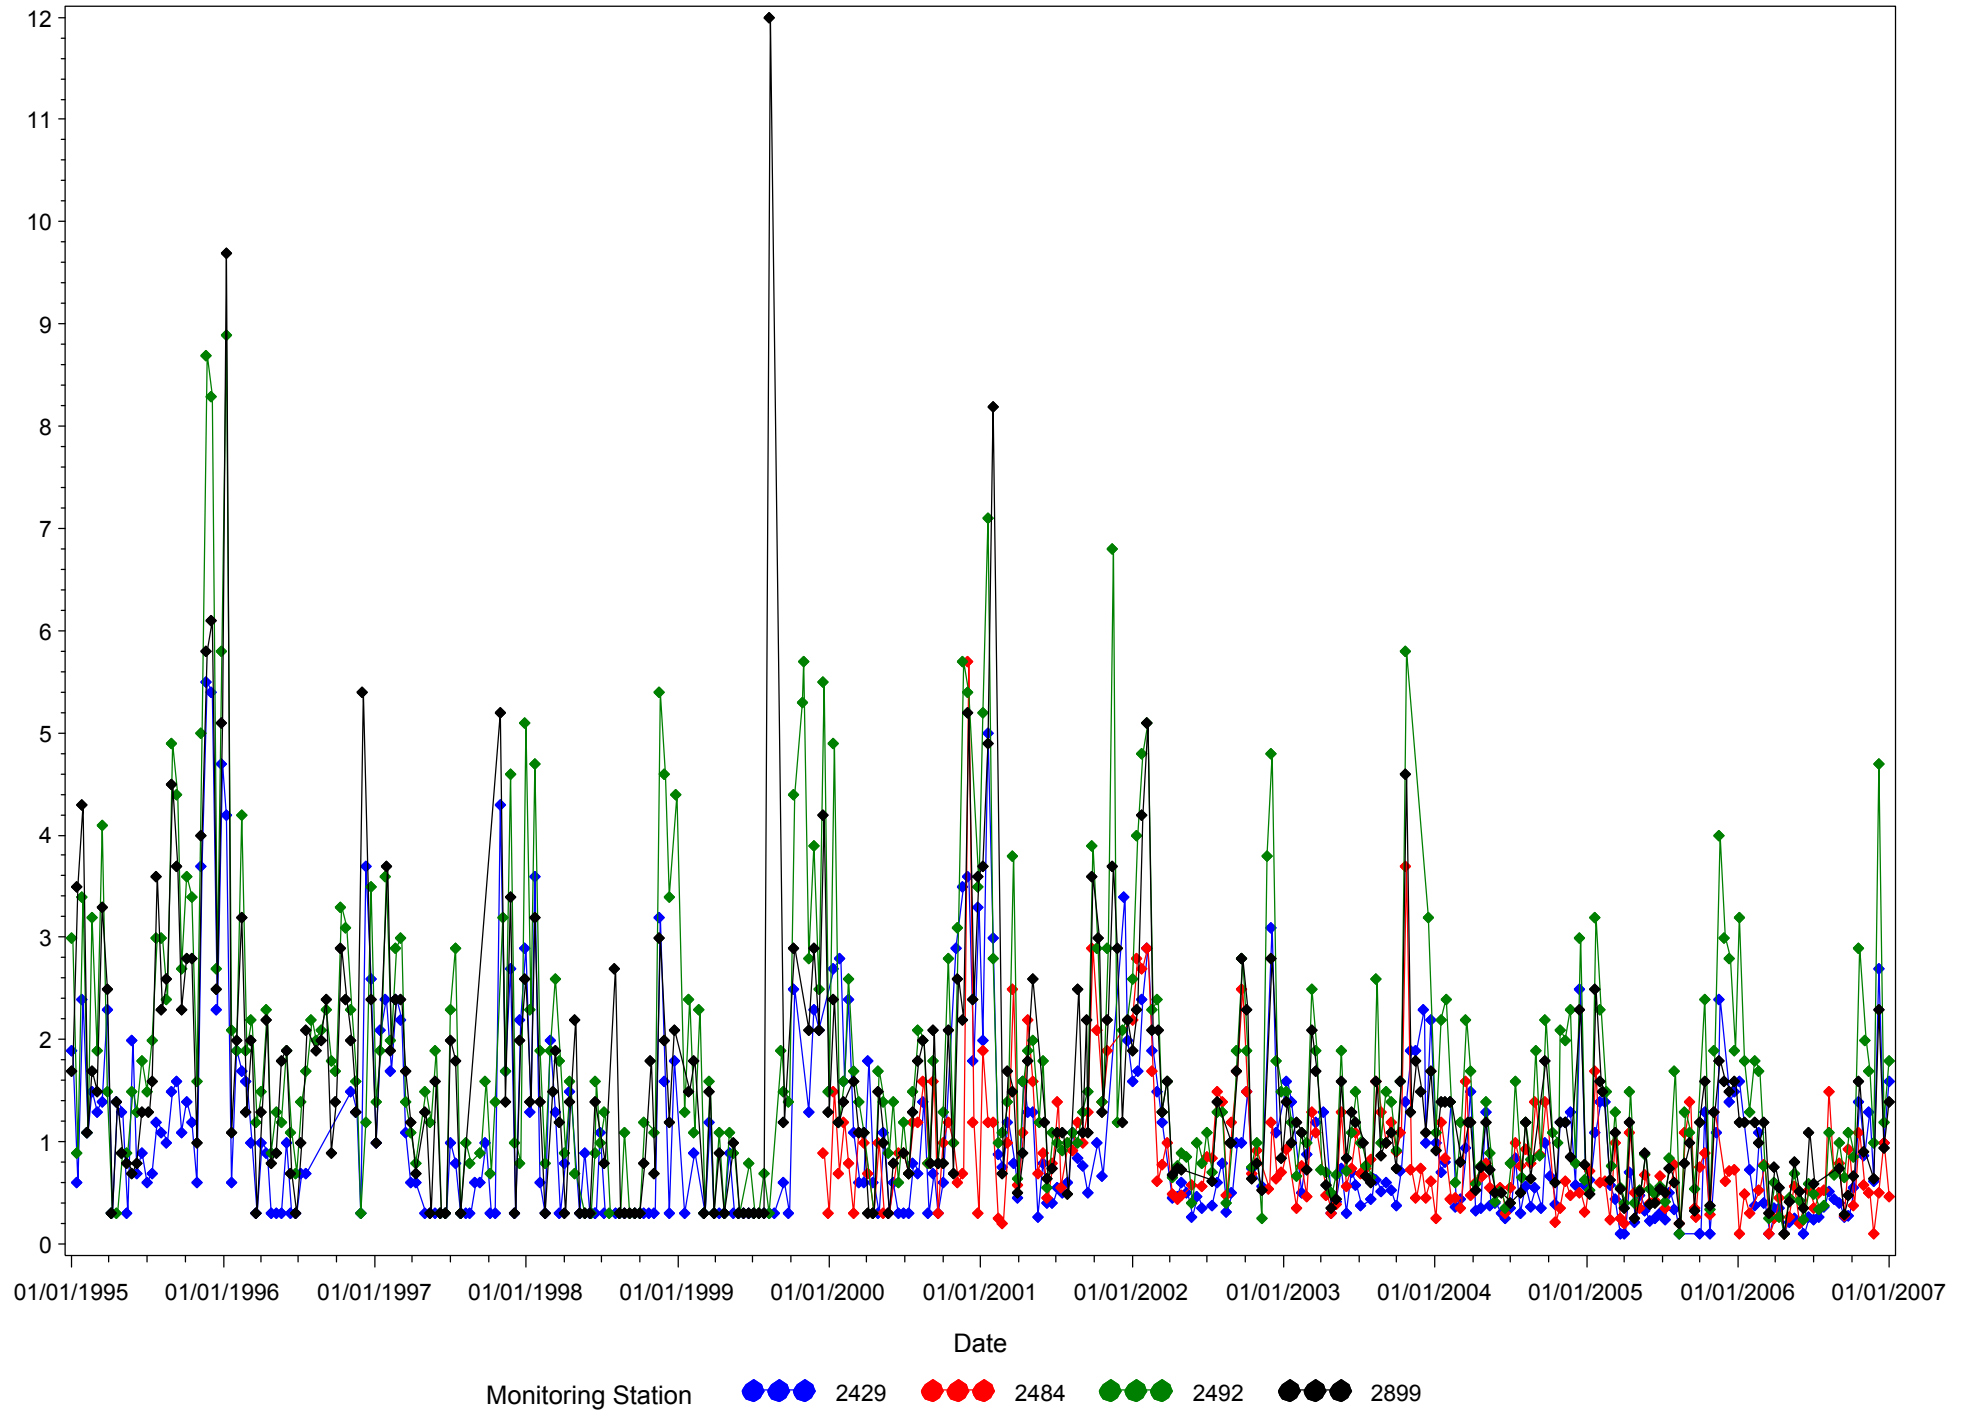

## Average NI Exposure by Monitoring Station

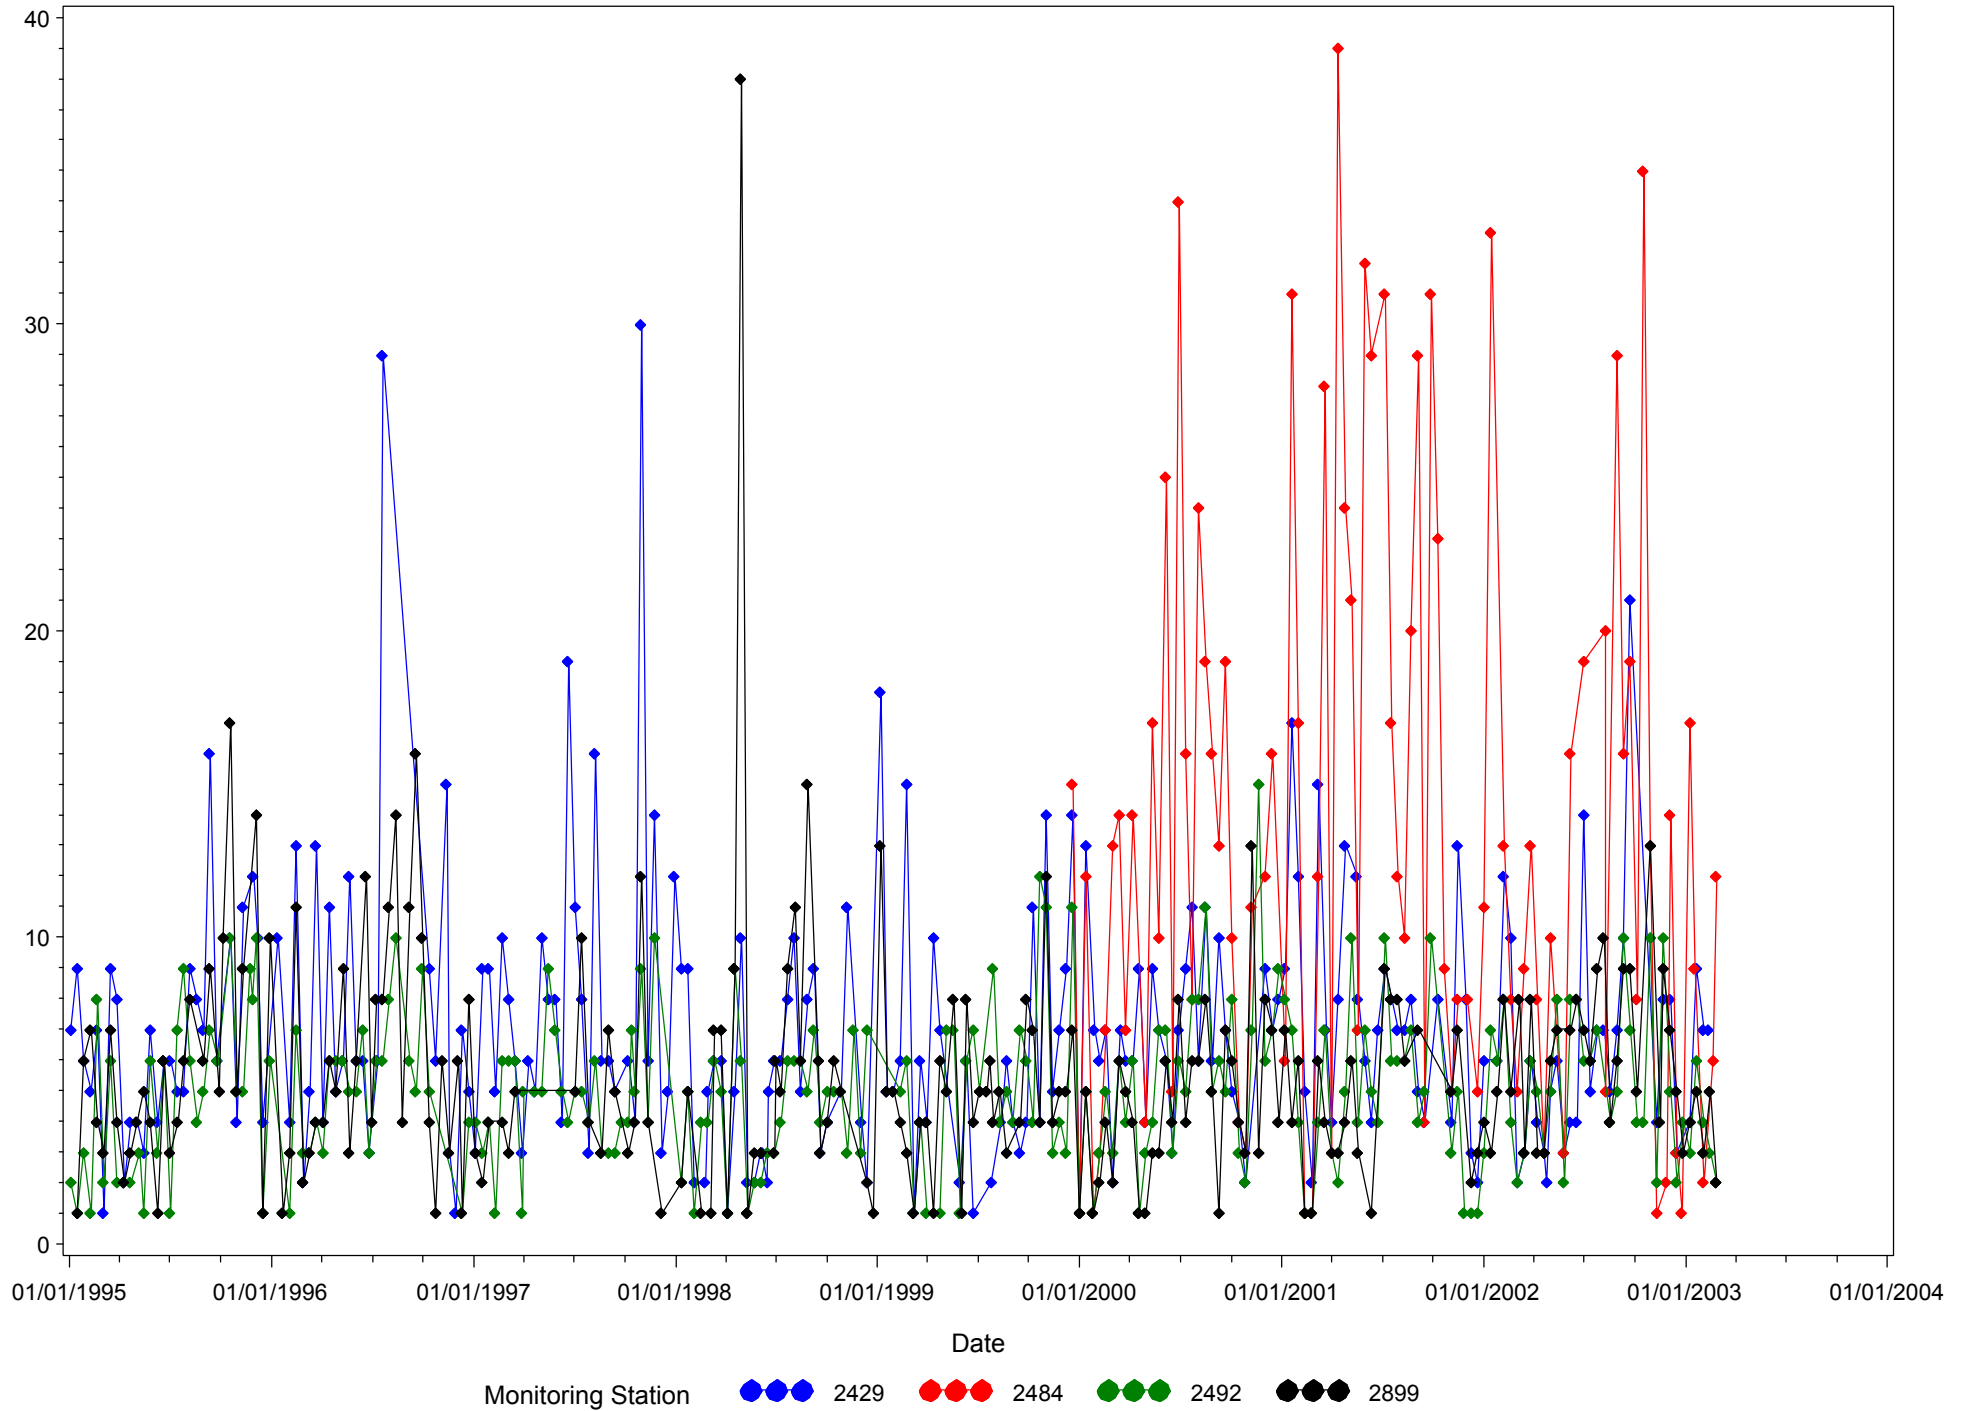



## Average ODCB Exposure by Monitoring Station

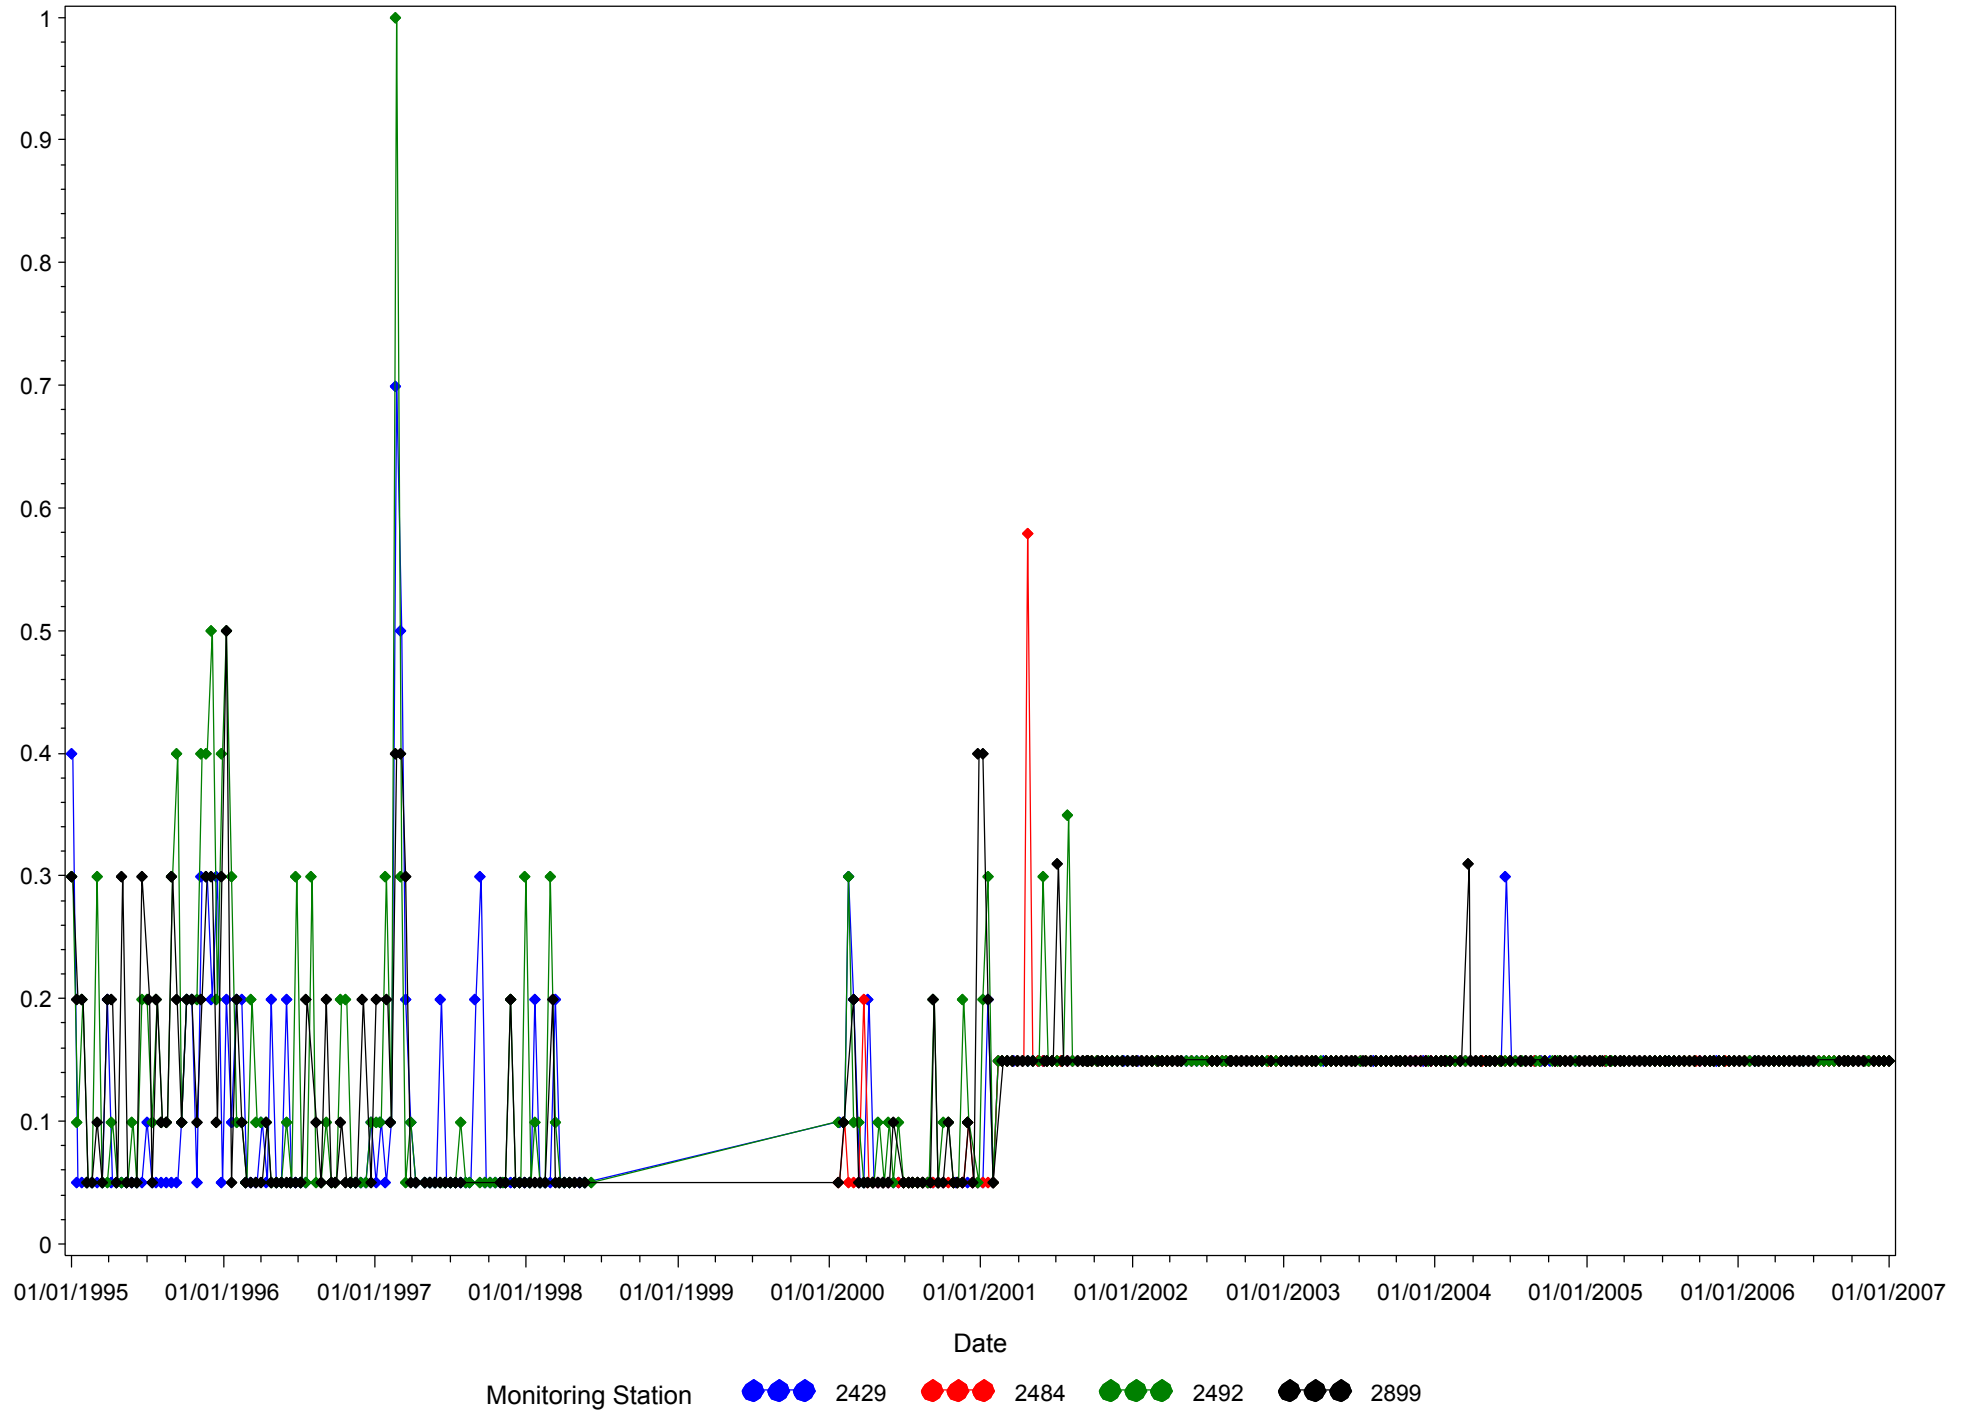

# Average OXYL Exposure by Monitoring Station

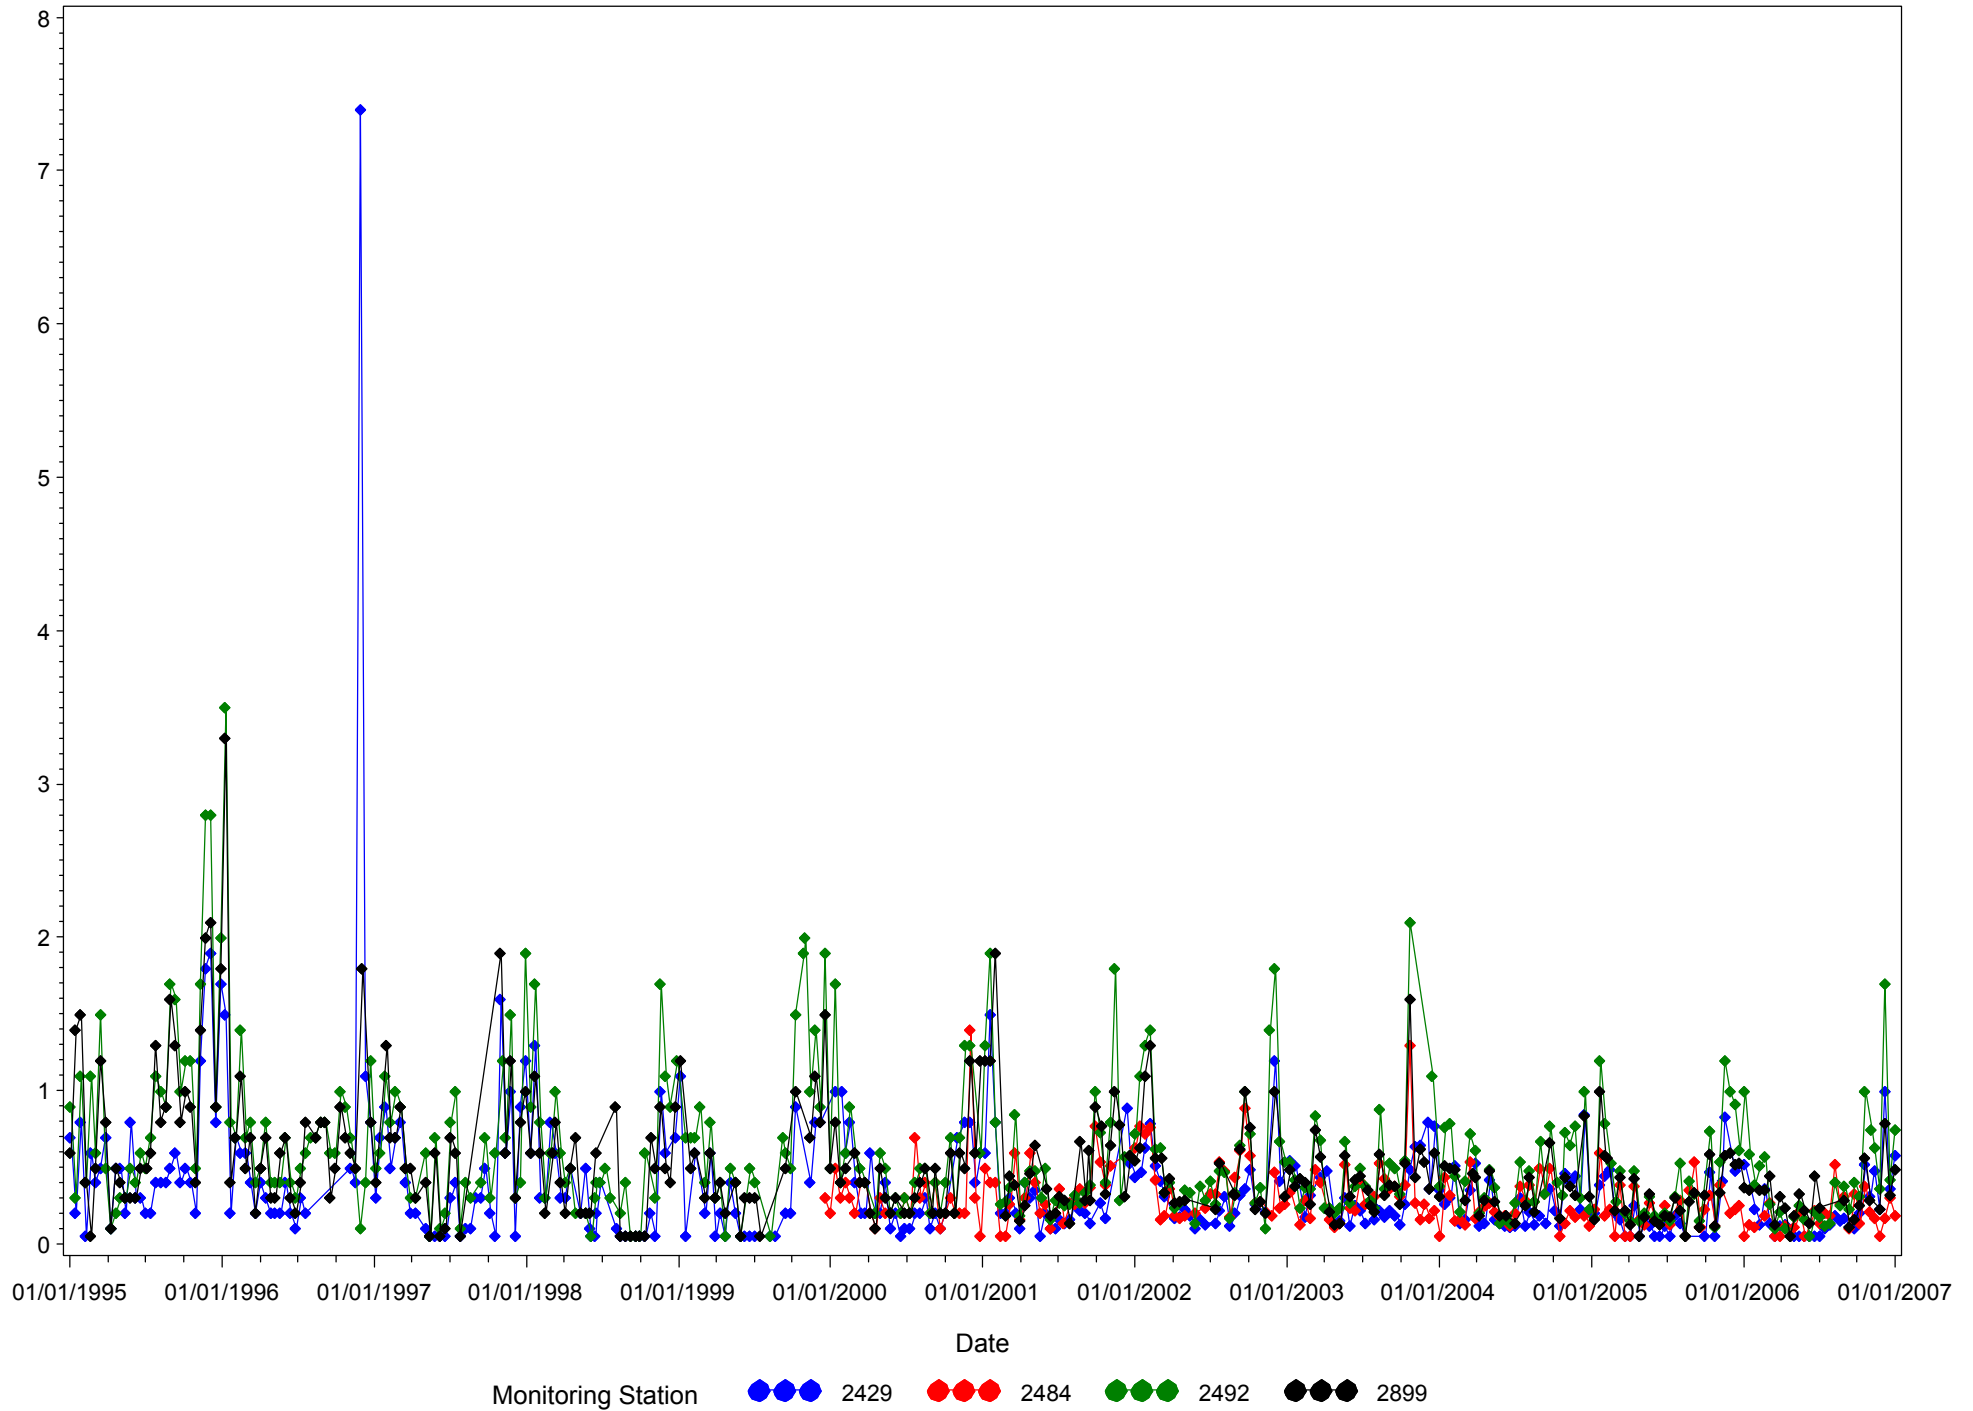

# Average PB Exposure by Monitoring Station

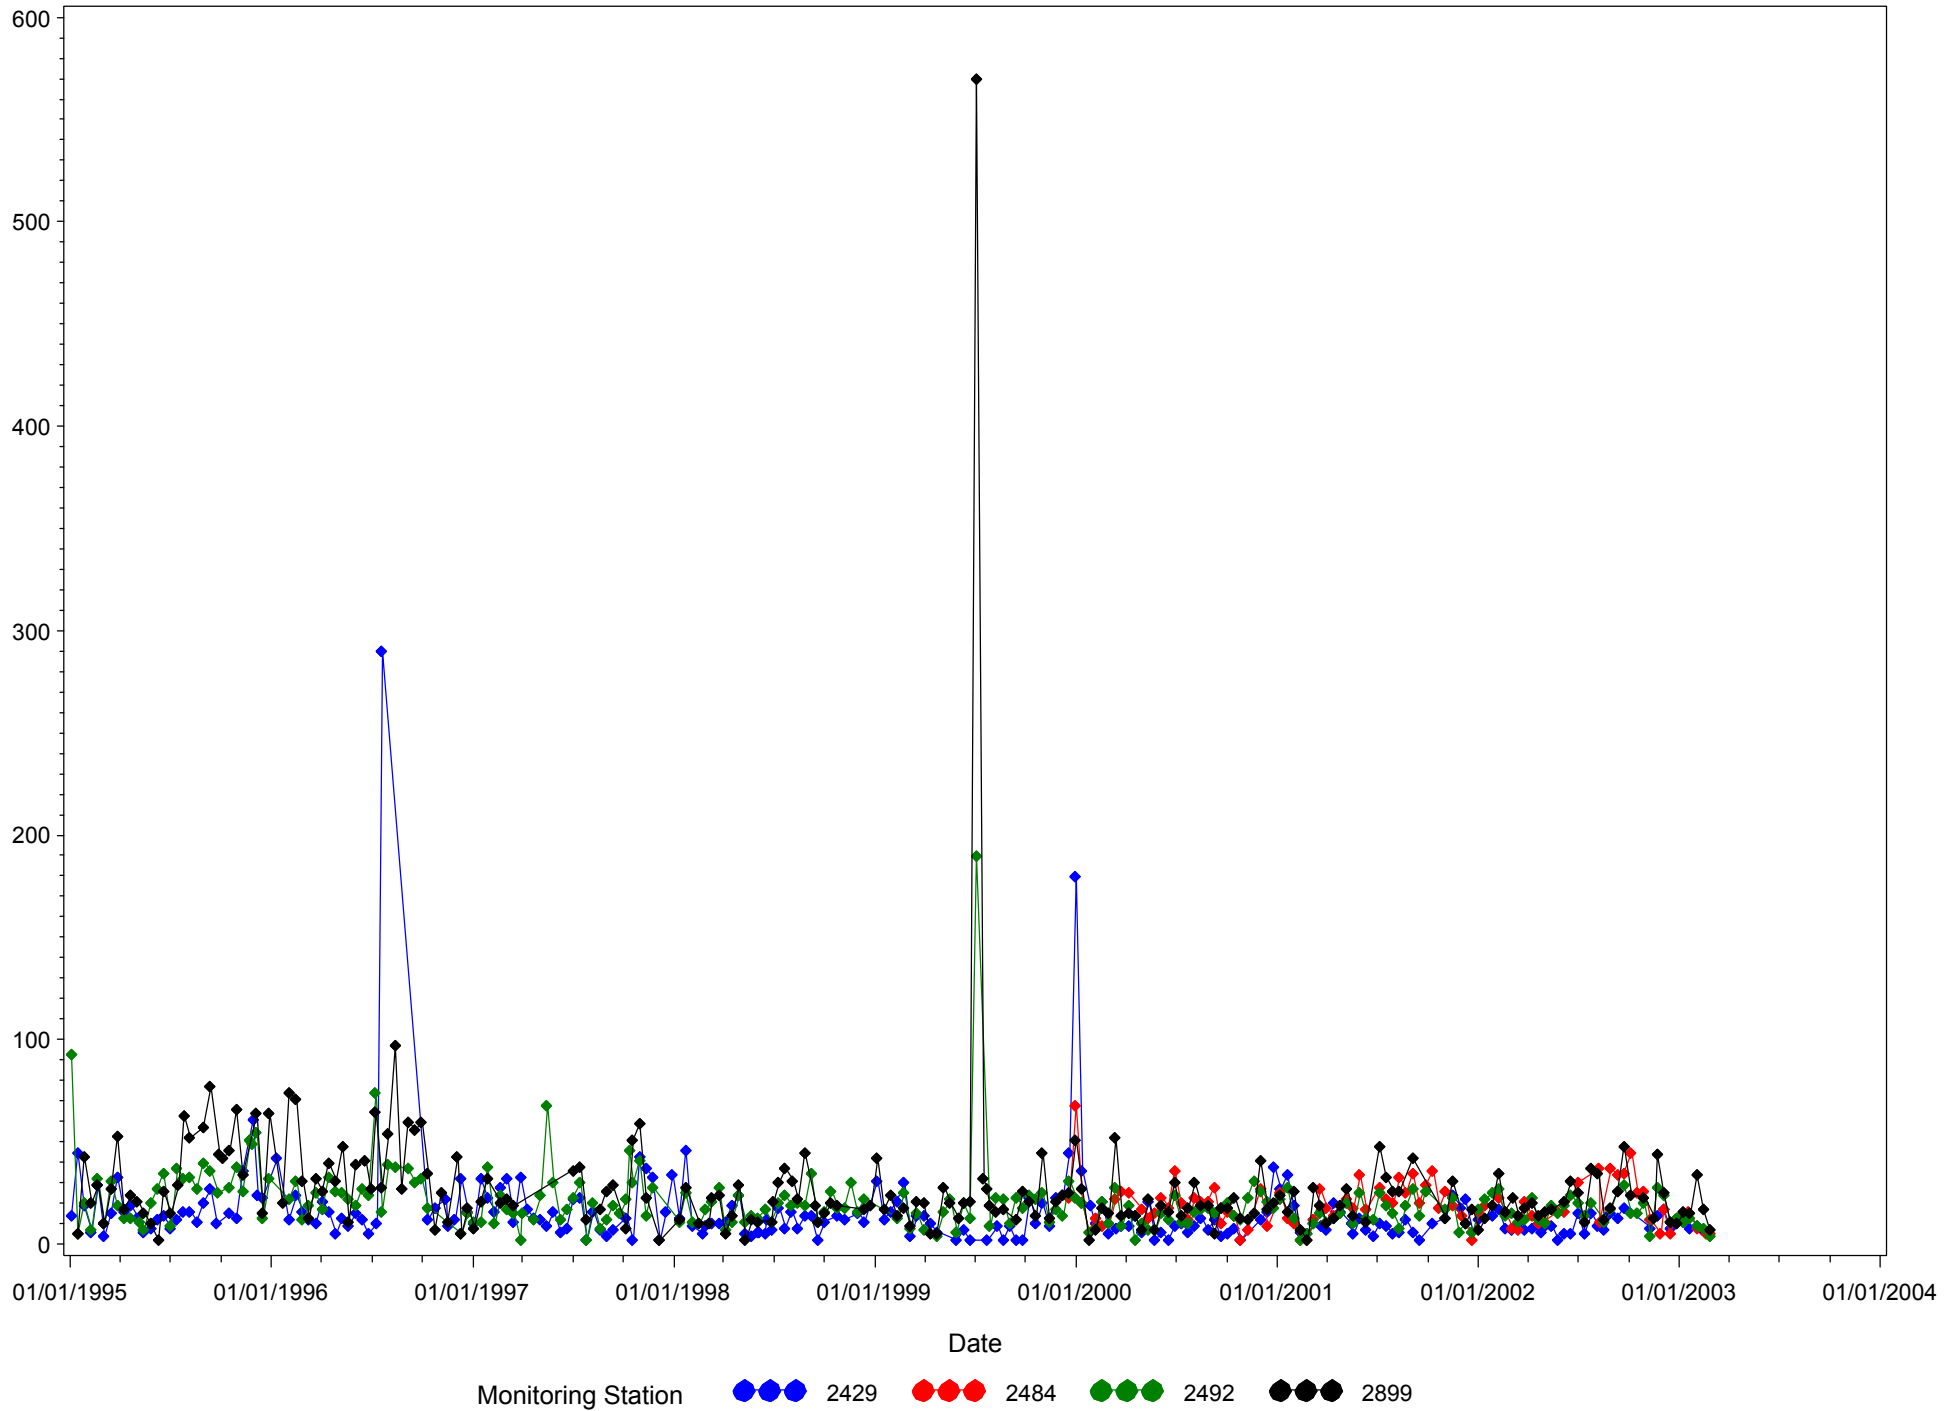

# Average PDCB Exposure by Monitoring Station

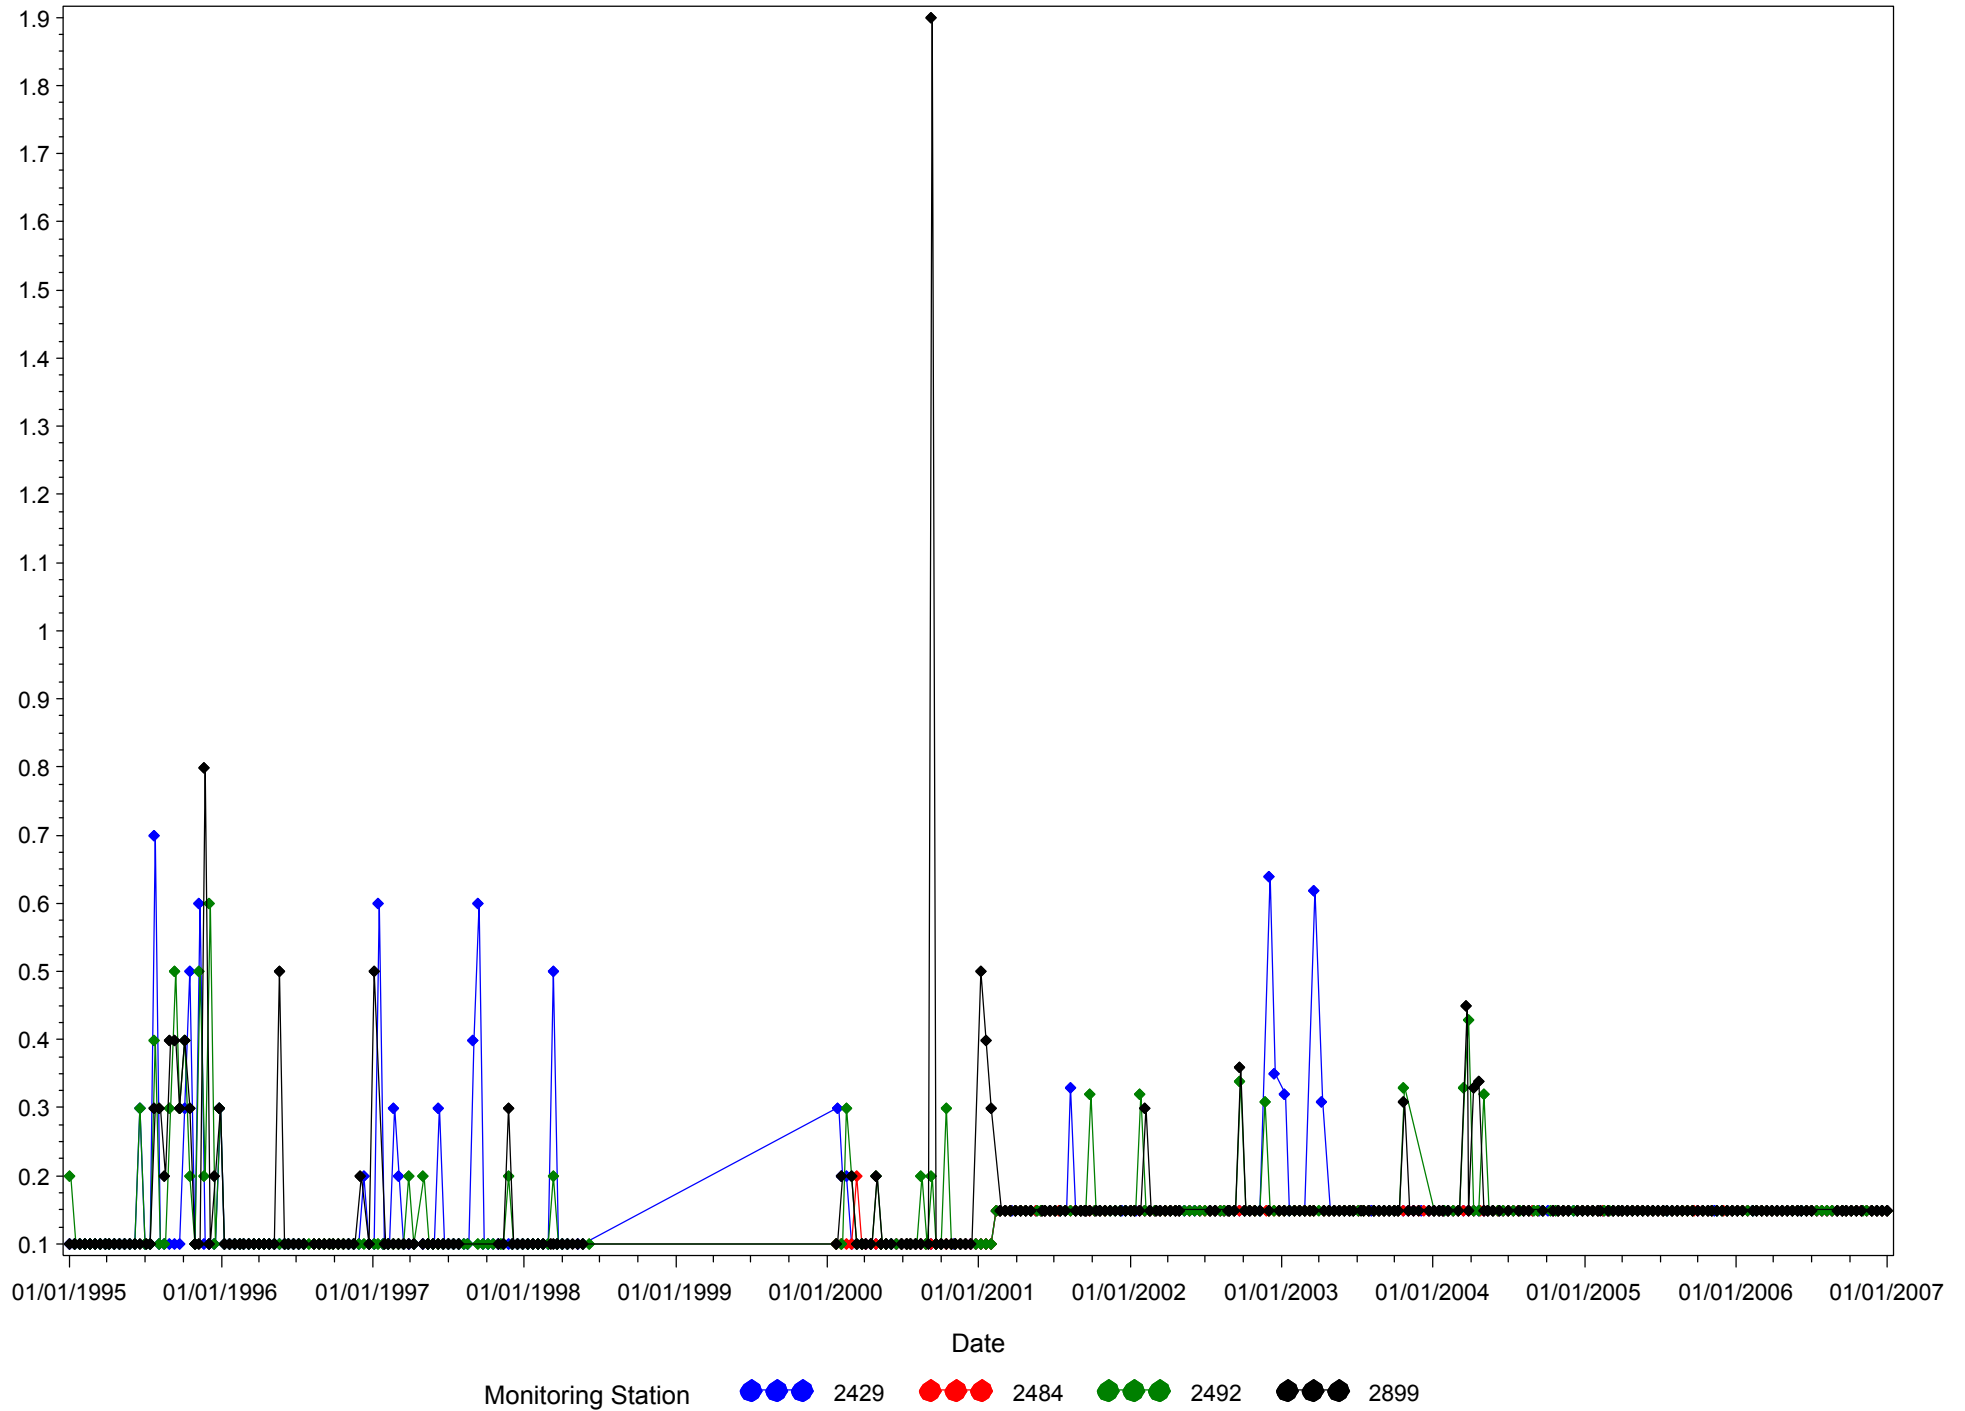

# Average PAH Exposure by Monitoring Station

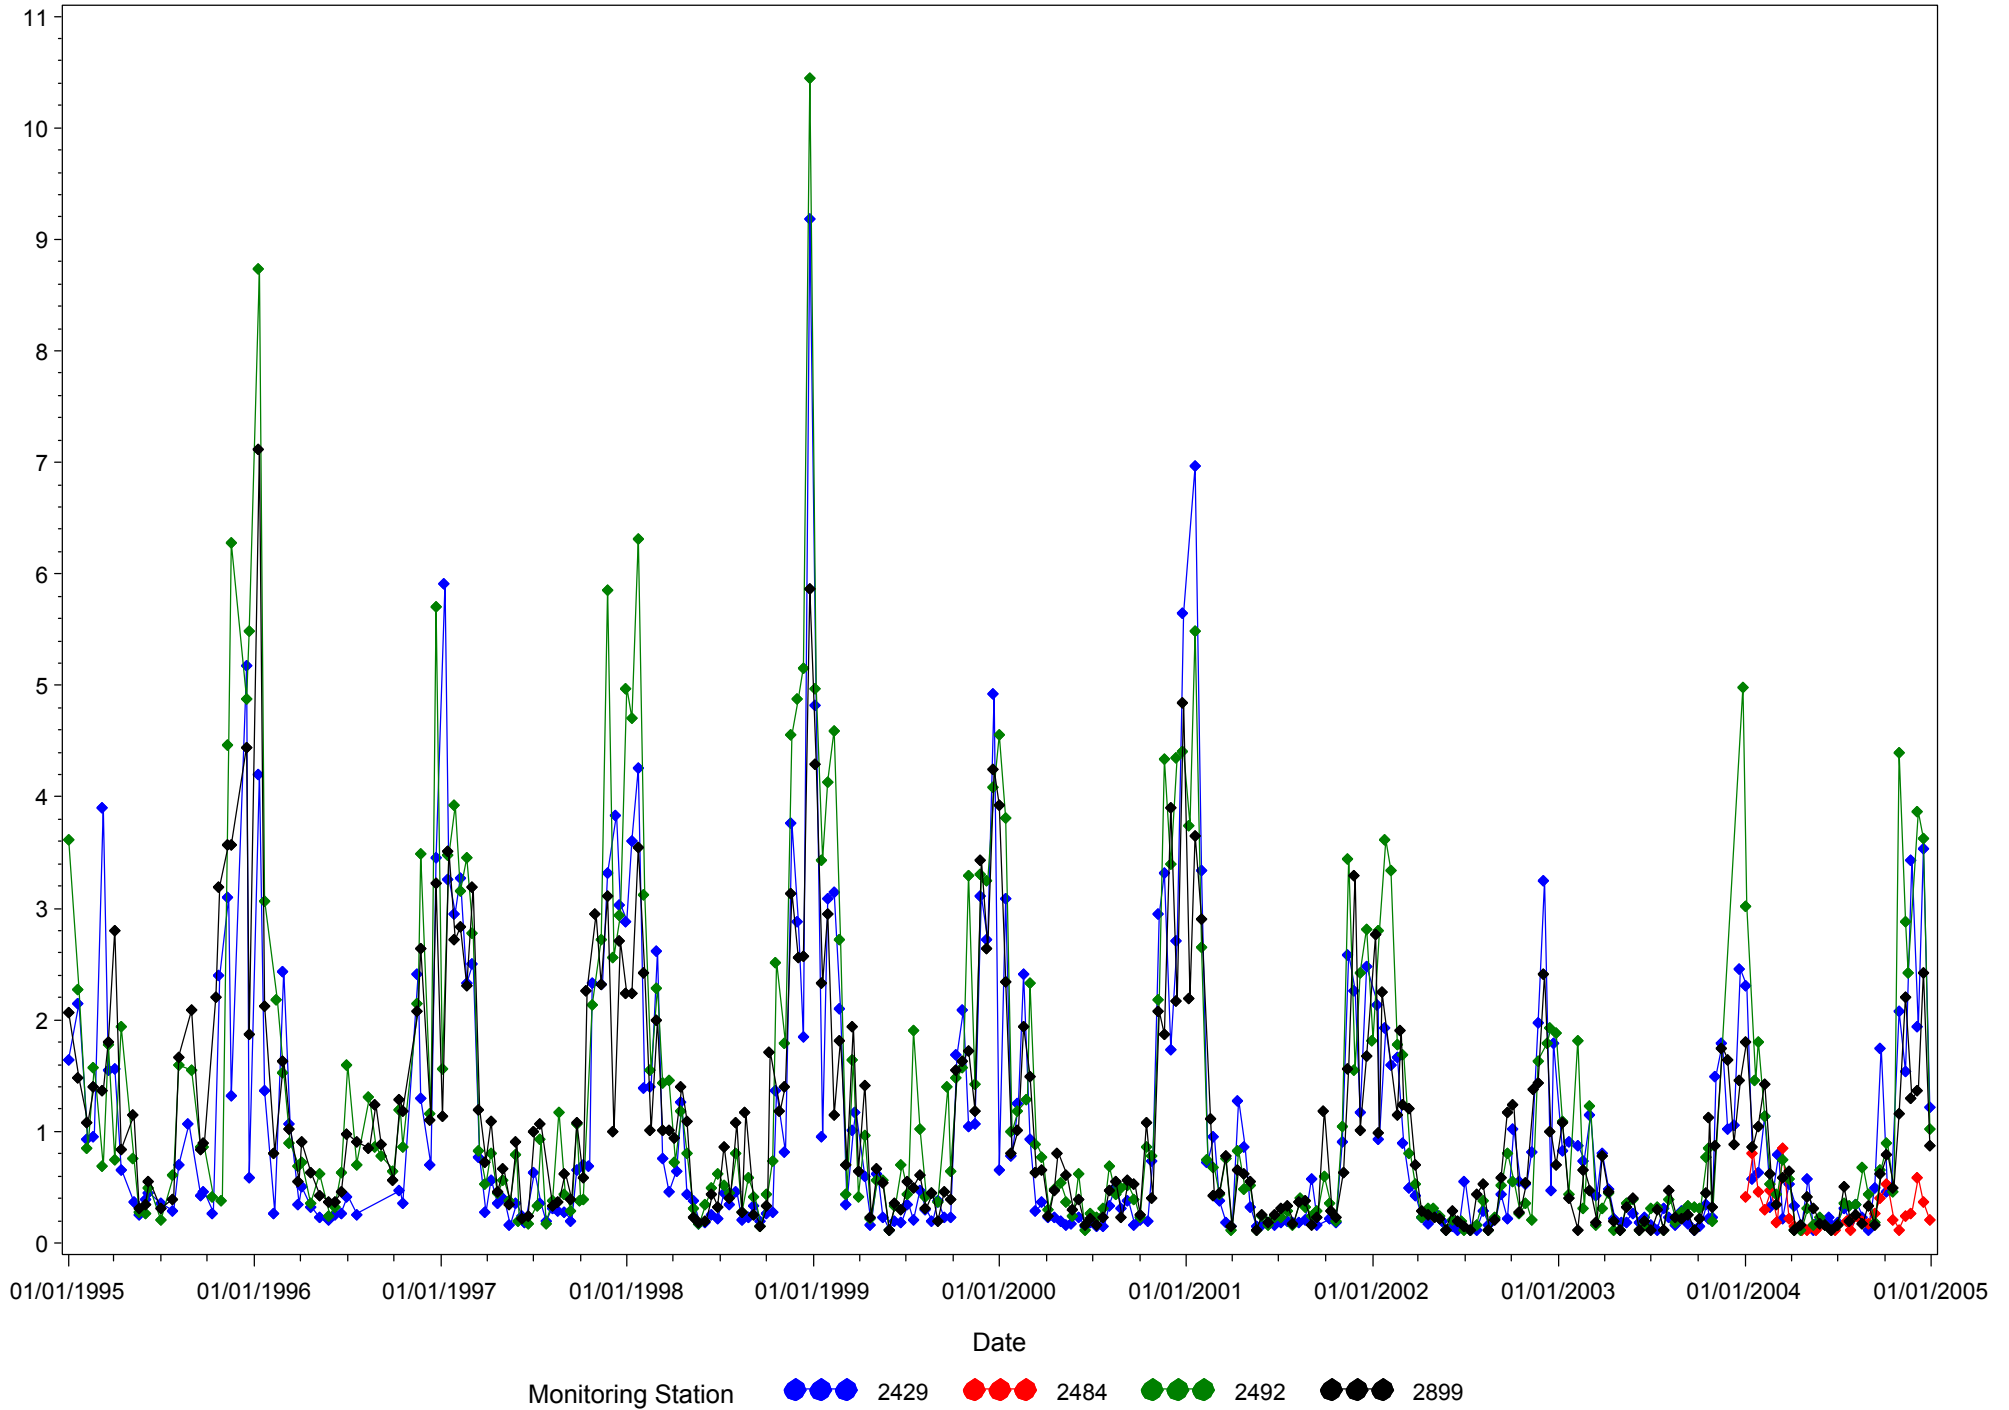

# Average PERC Exposure by Monitoring Station

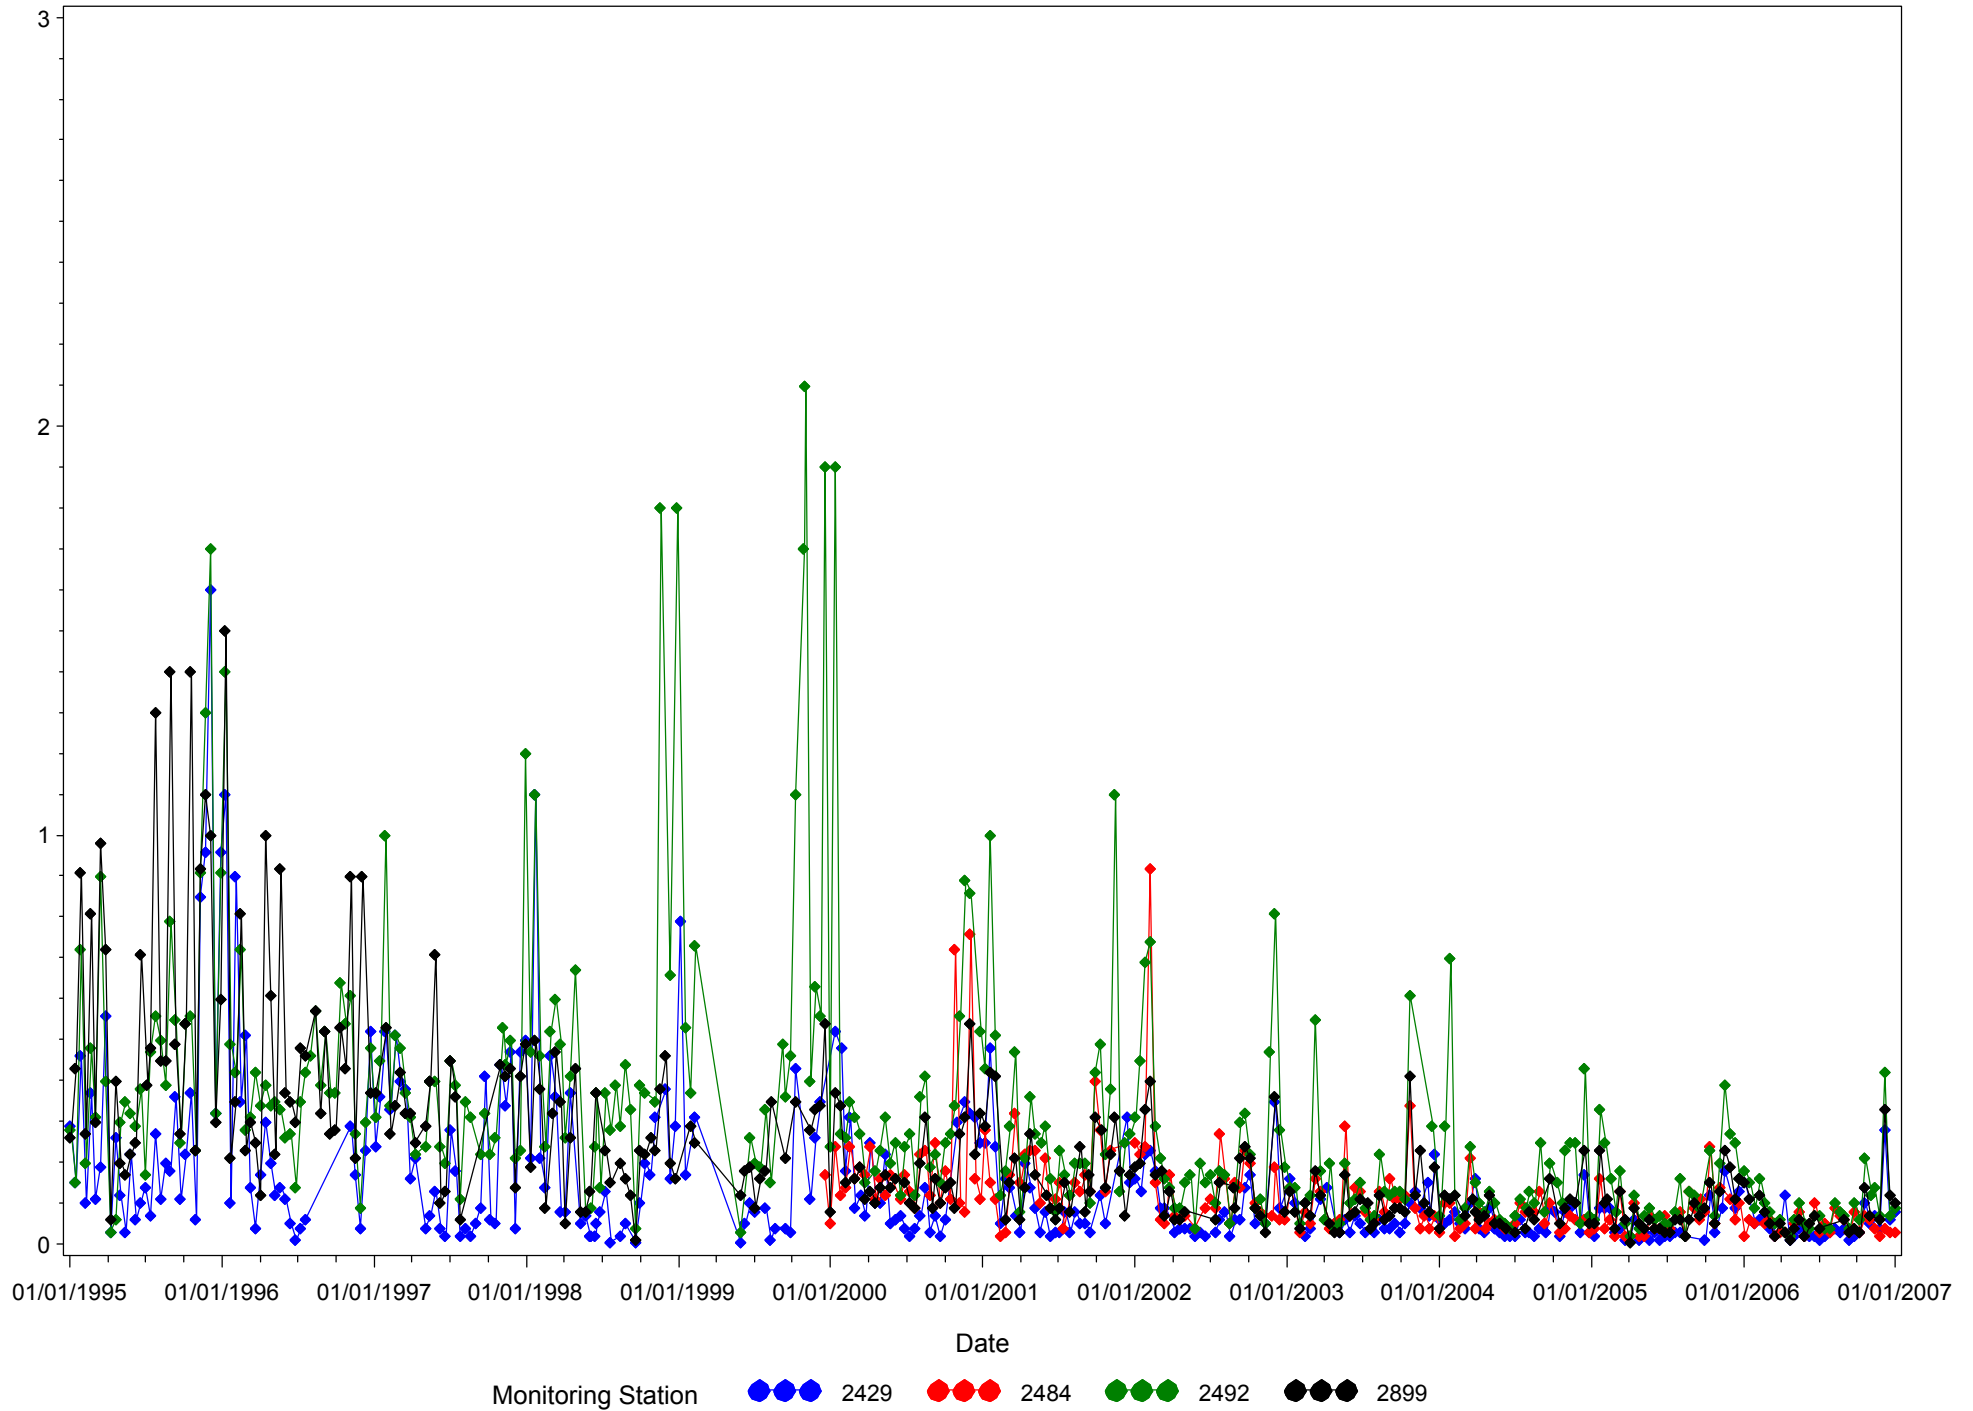

# Average SE Exposure by Monitoring Station

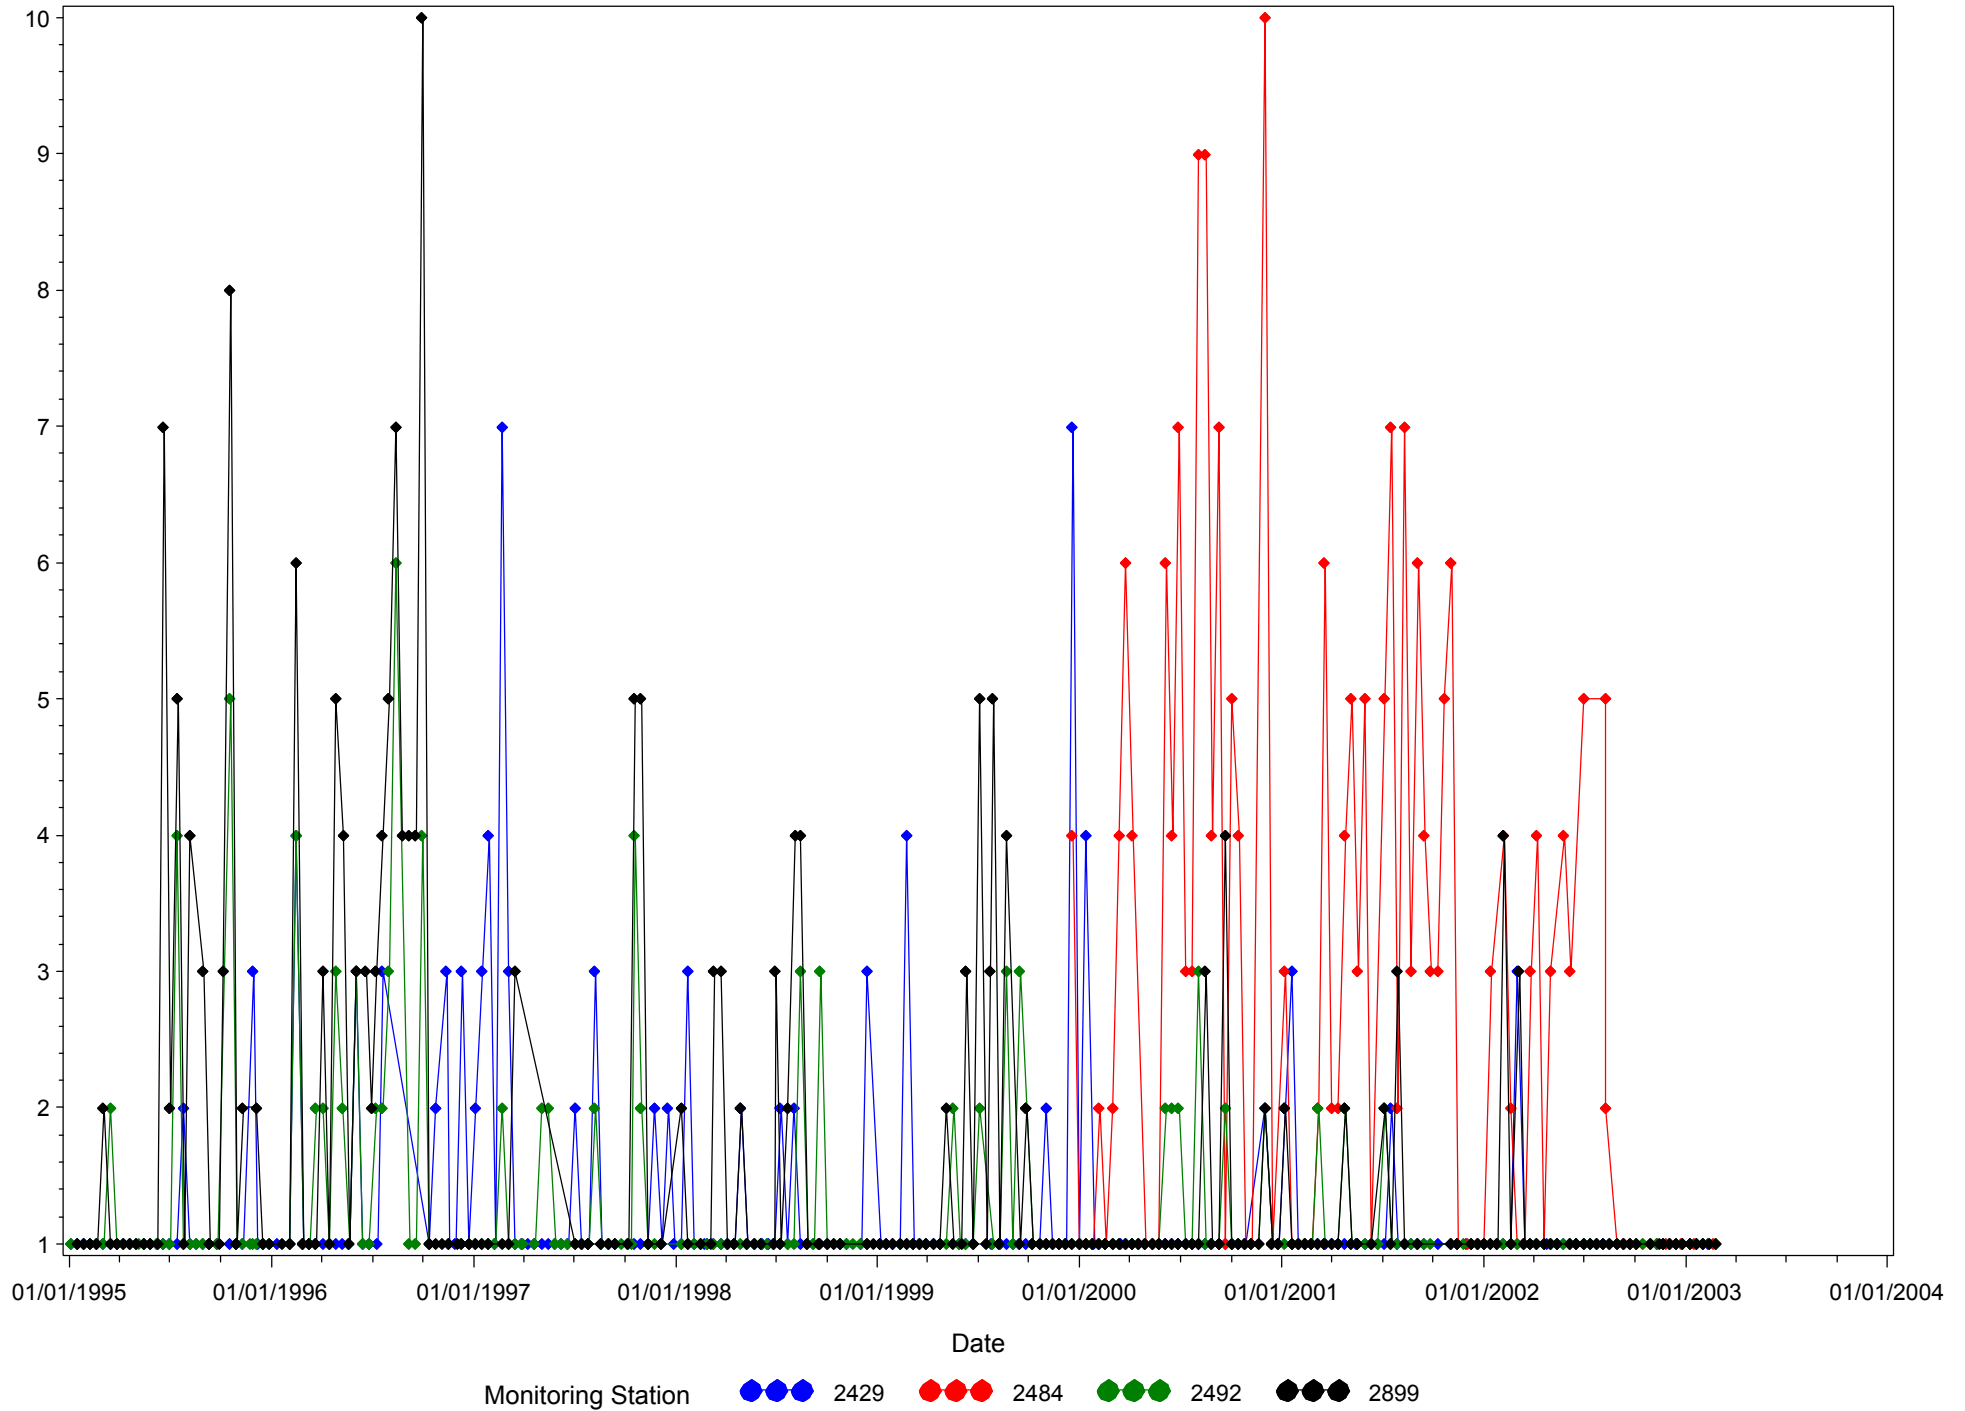

# Average TCE Exposure by Monitoring Station

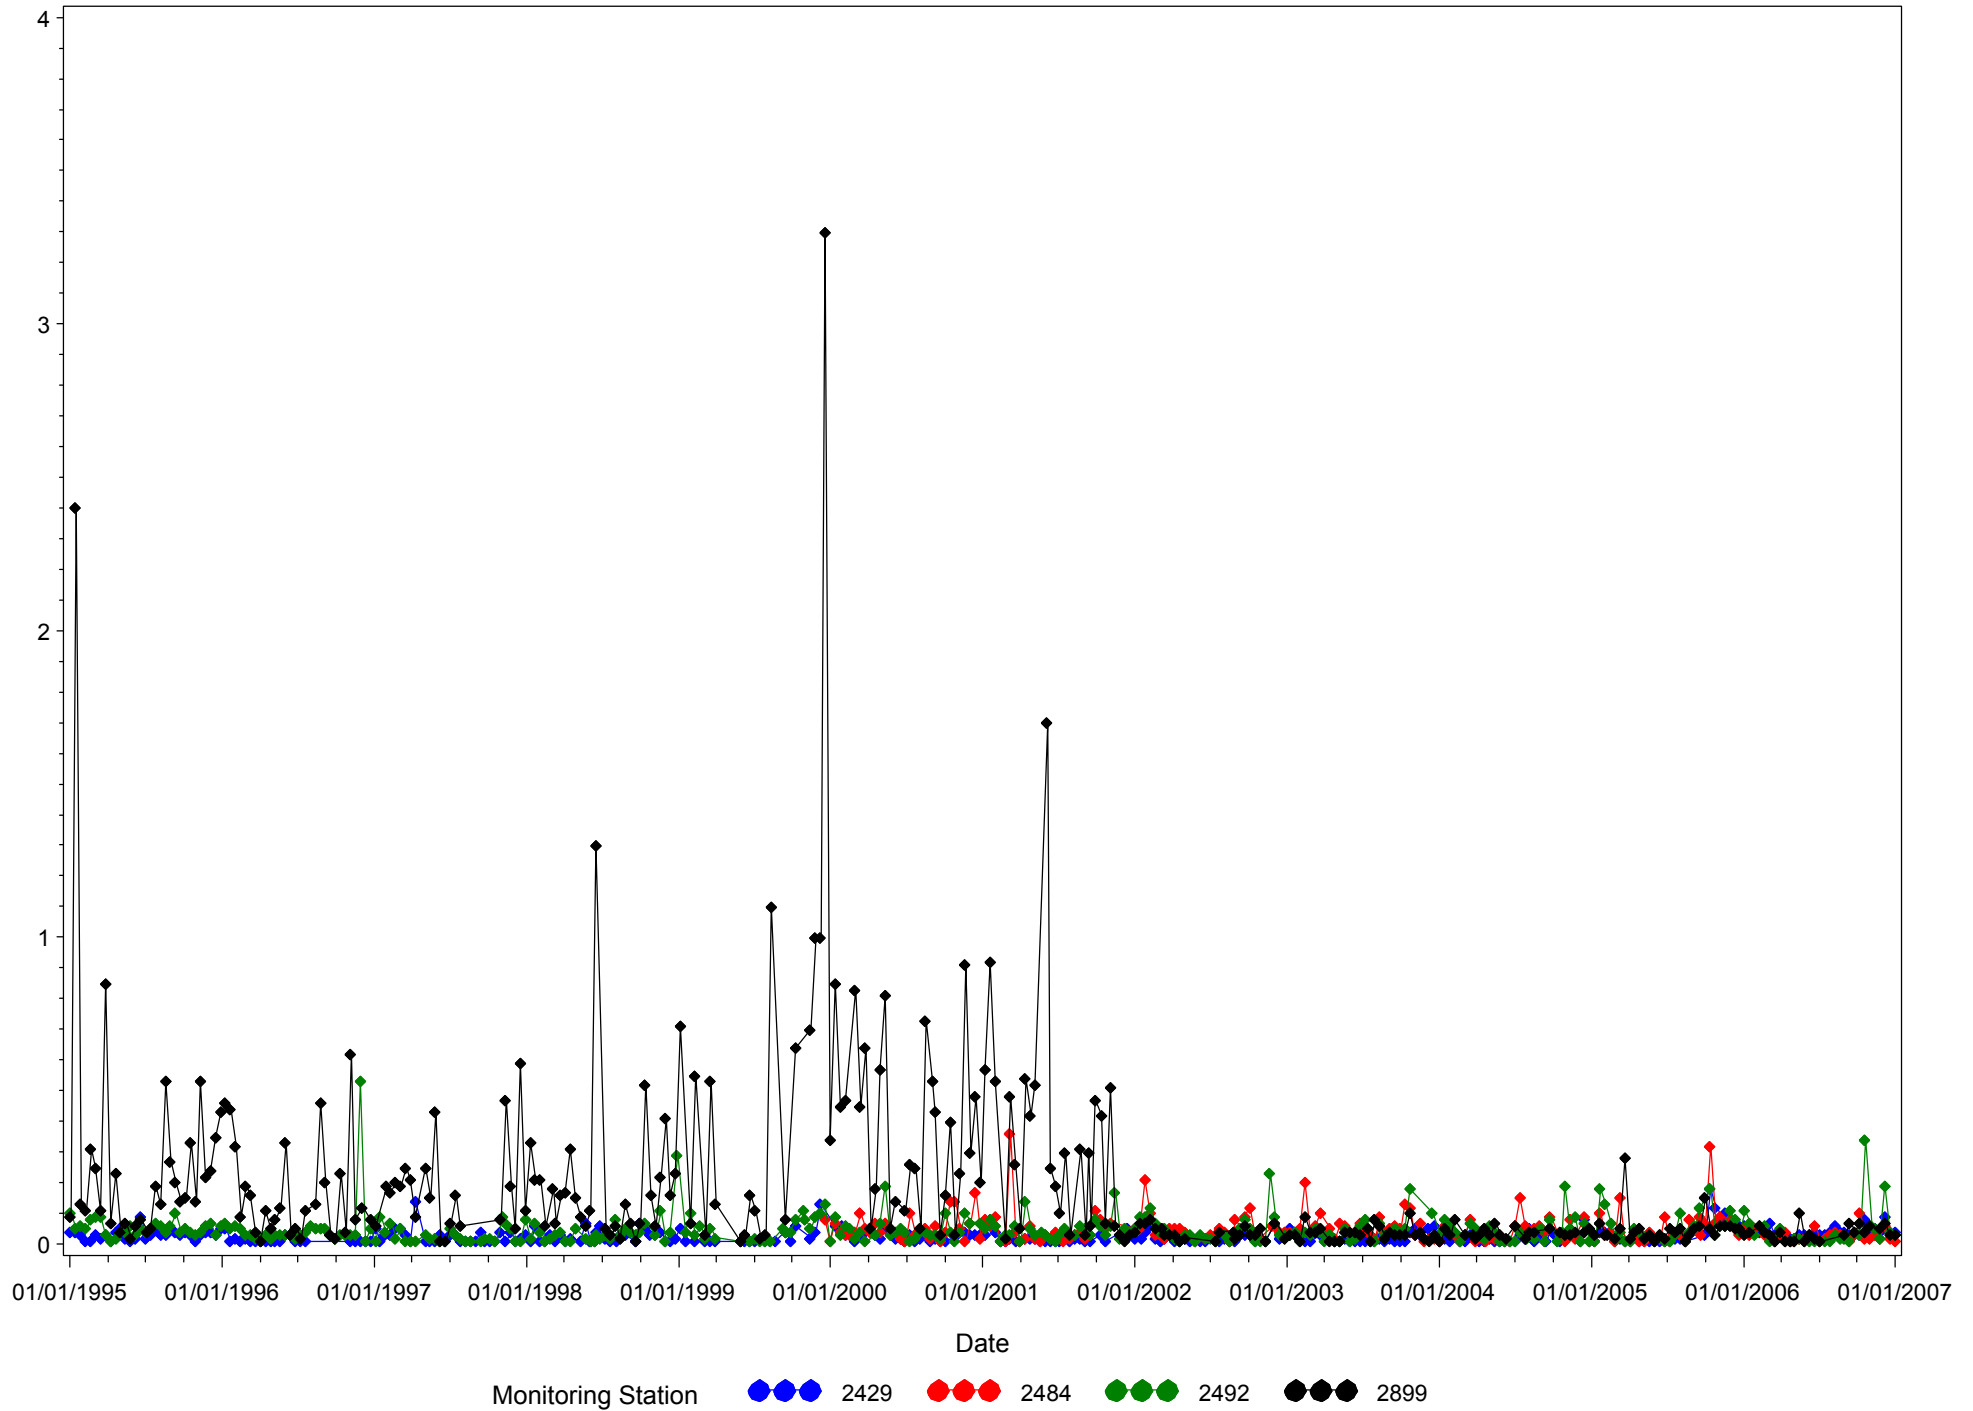



# Average TOLU Exposure by Monitoring Station

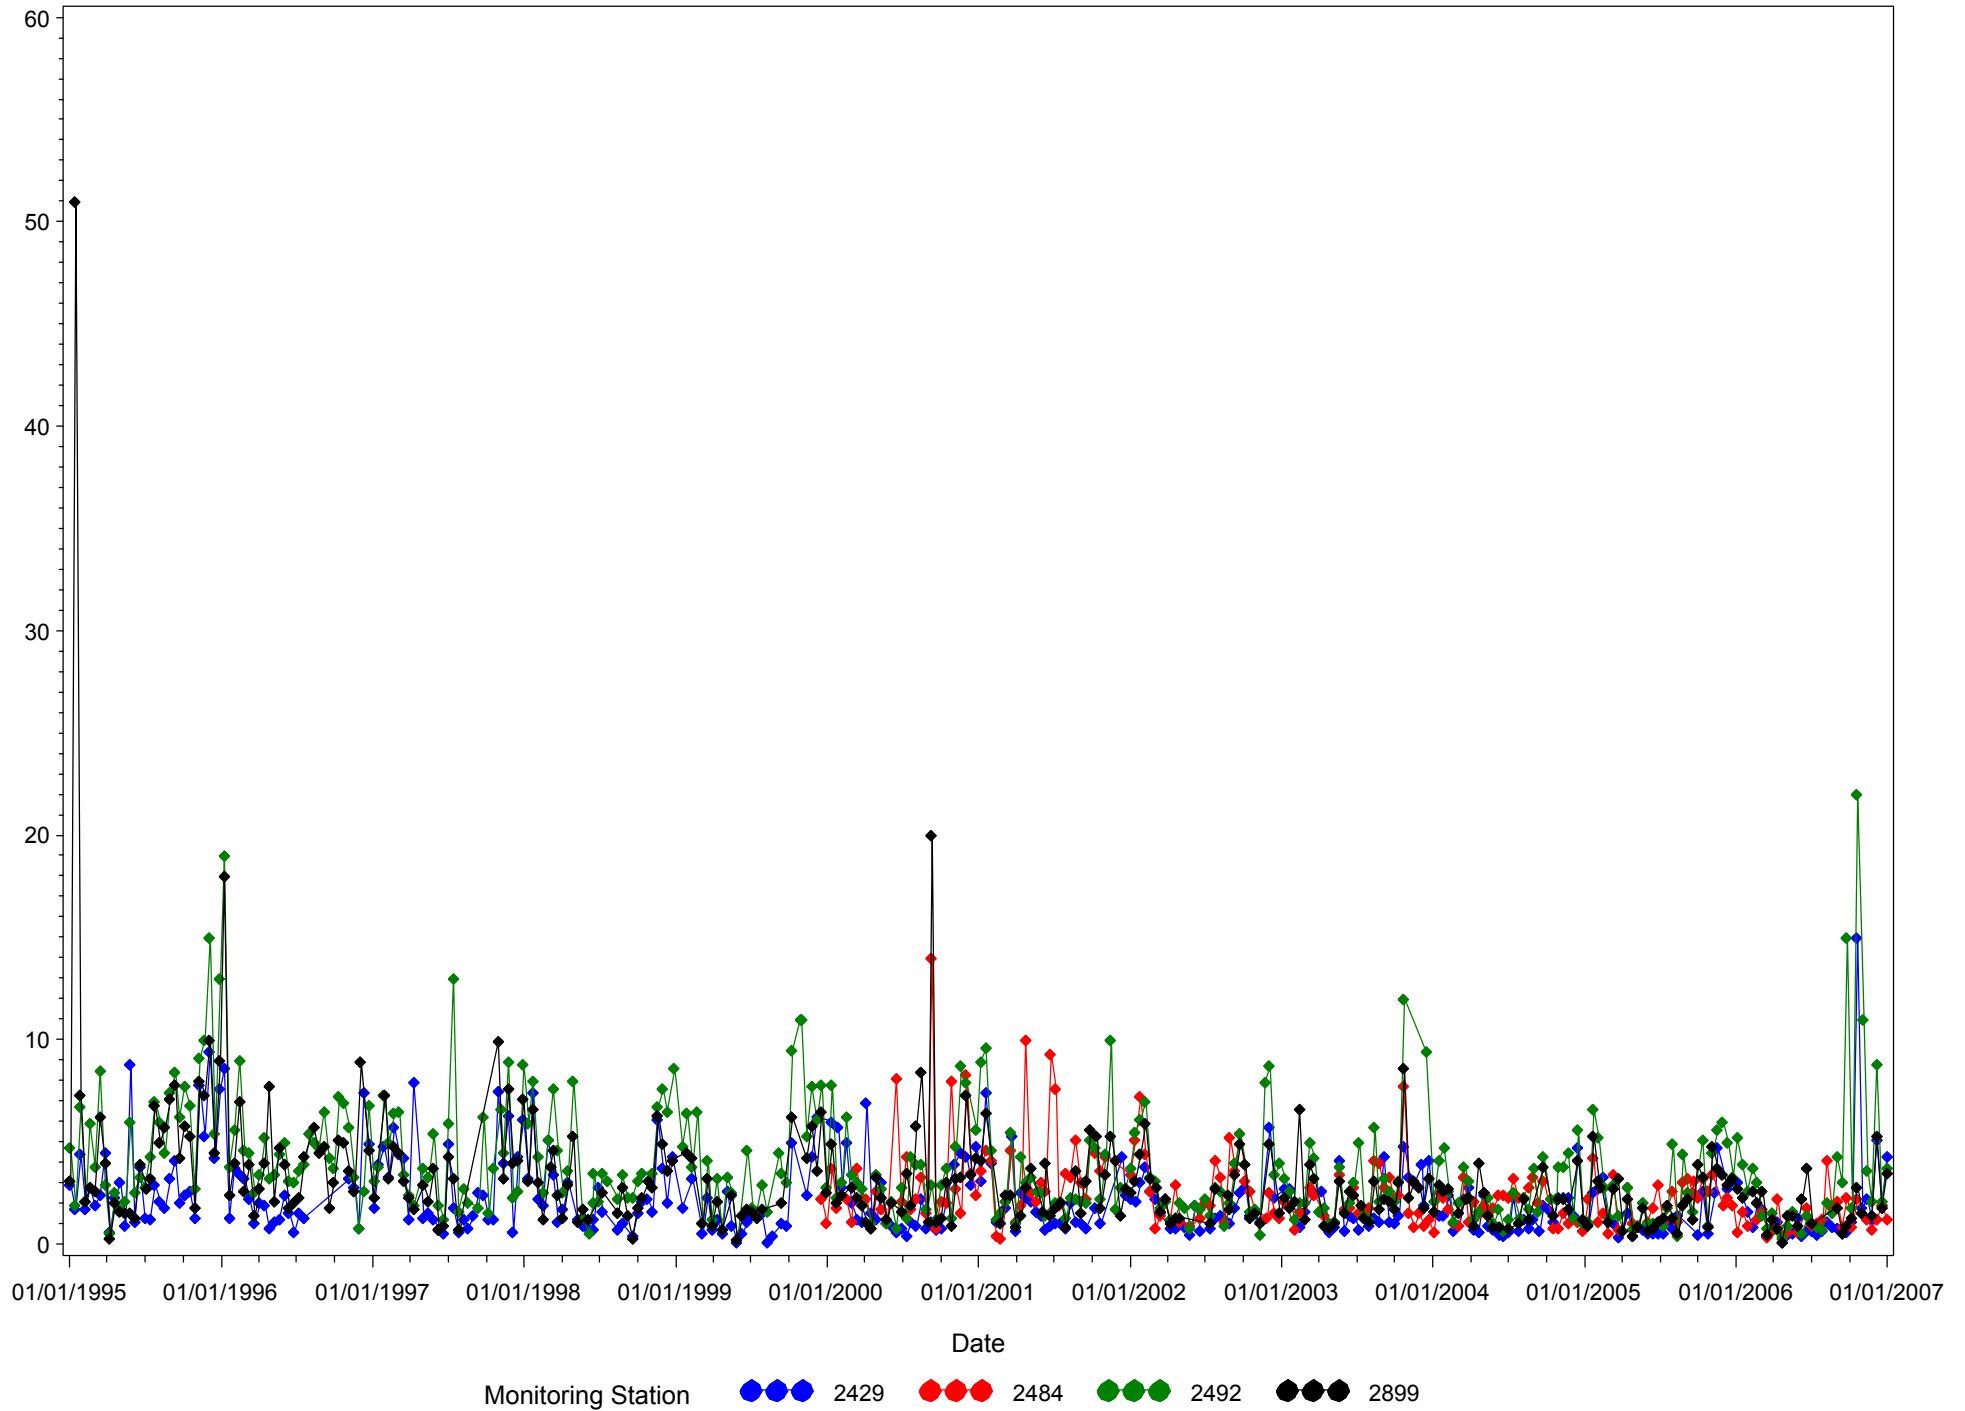

## Average V Exposure by Monitoring Station

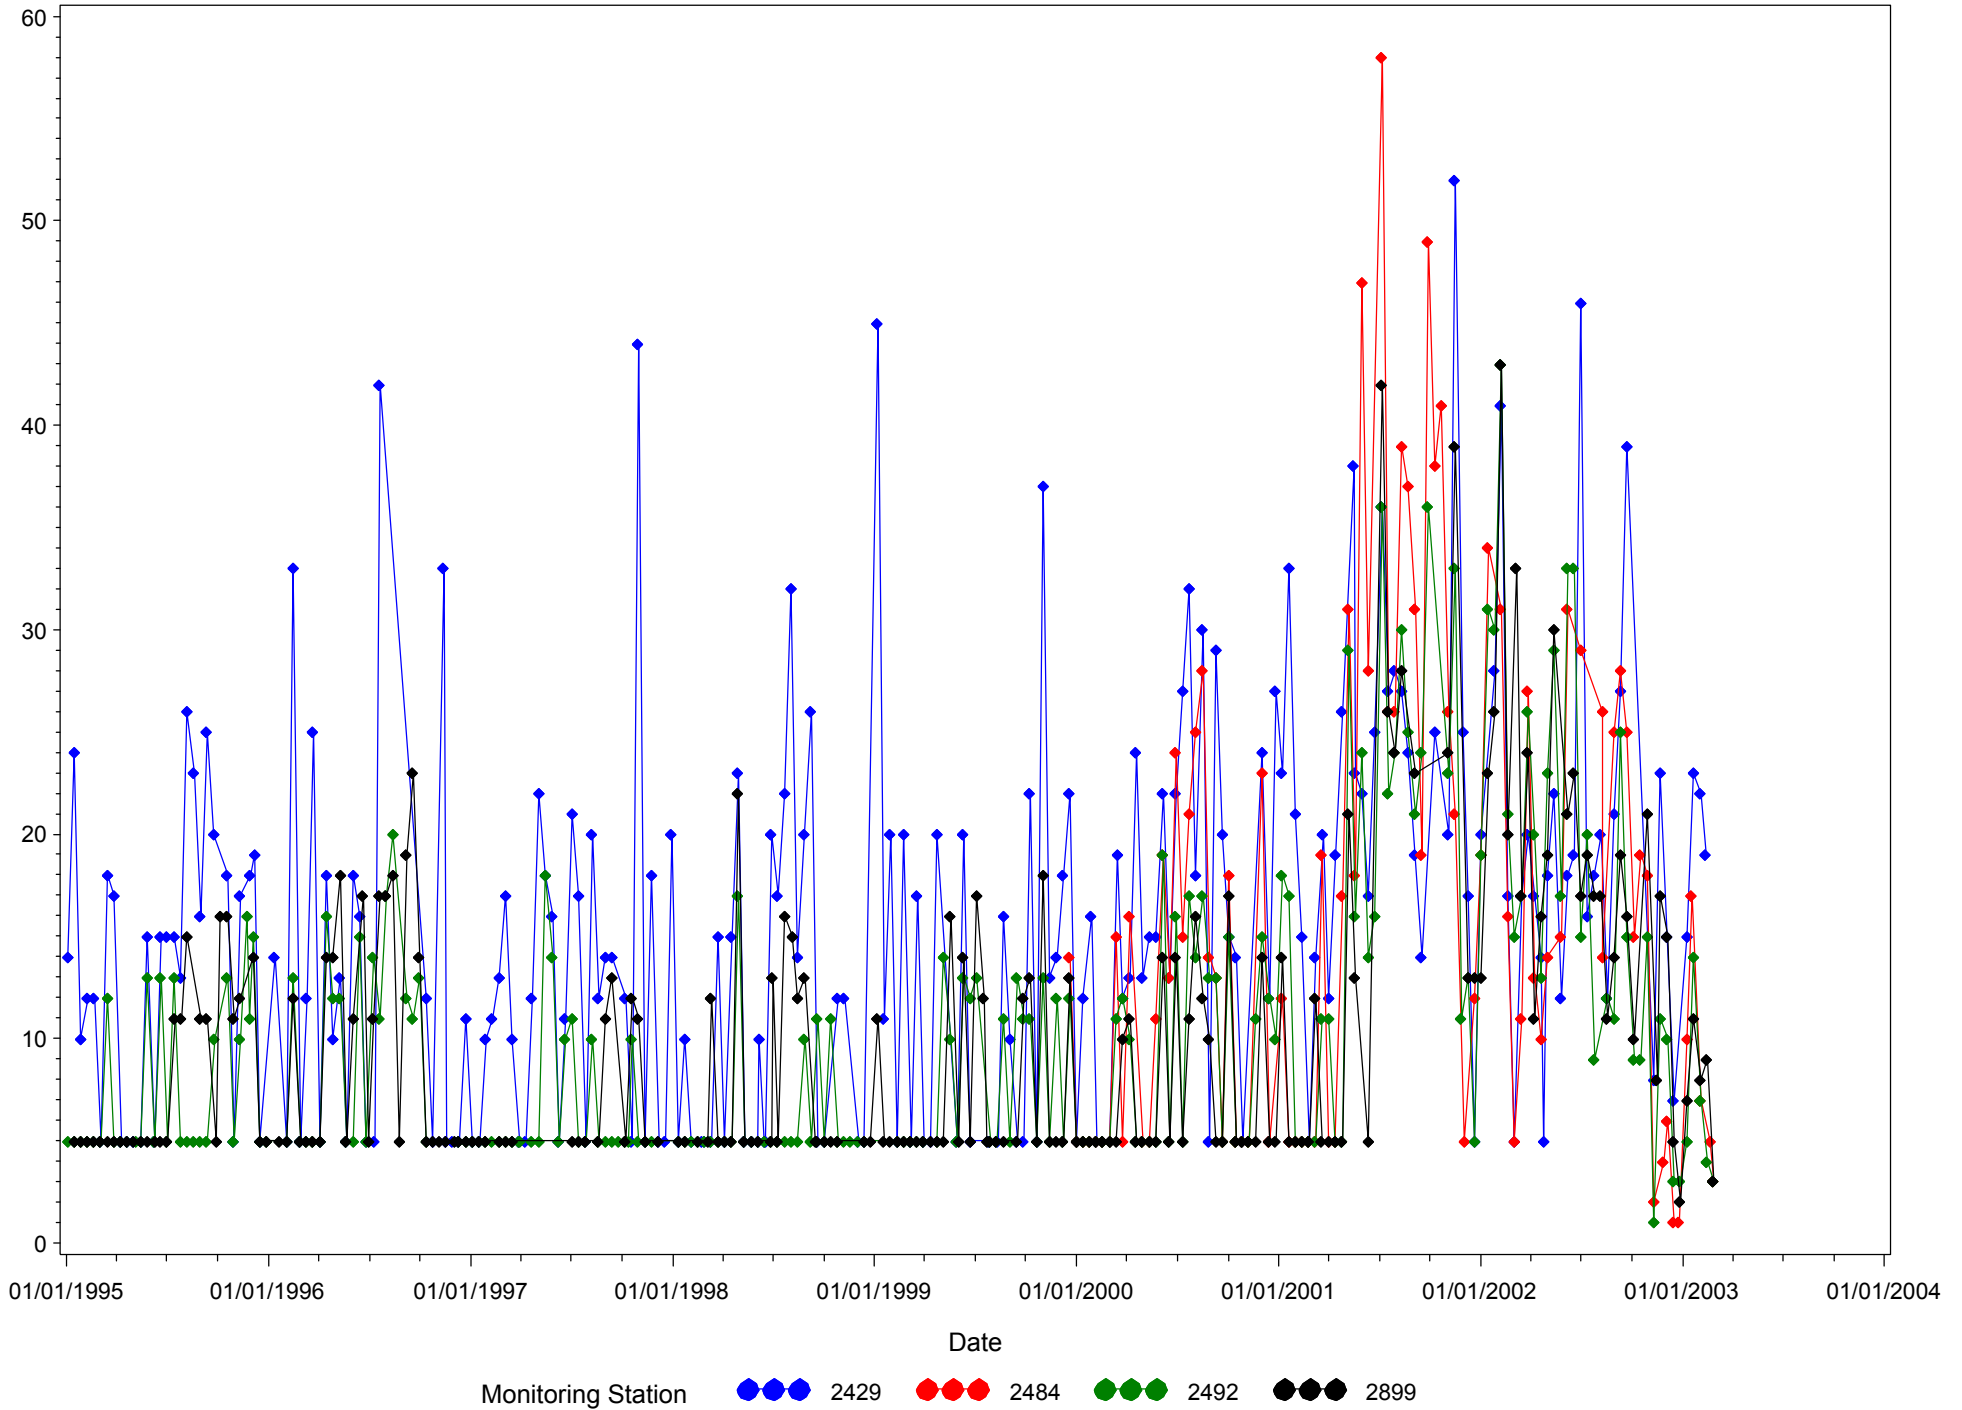

Supplement: NIHMS747120-supplement-Supplemental_Digital_Content.pdf [file NIHMS747120-supplement-Supplemental_Digital_Content.pdf]
